# Supplementary material for: Growth and survival relationships of 71 tree species with nitrogen and sulfur deposition across the conterminous U.S
Source: PubMed Central journal article supplement (PMC6193662; doi:10.1371/journal.pone.0205296), 2018-10-18

Fig S1. Tree growth and survival association curves with nitrogen and sulfur deposition by species. Each curve represents the annual growth (top graphs) or 10 year survival (bottom graphs) associations with nitrogen (N; left panels) or sulfur (S, right panels) deposition across the conterminous United States. Sample sizes and Pearson's correlation coefficient between N and S deposition for growth and survival analyses are given above the upper and lower panel respectively. Shaded areas represent the 2 factor support interval for the response curves.

# Pacific silver fir

*Abies amabilis*

## N deposition

## S deposition

growth: sample size= 5680 , N & S corr.= 0.63 , VIF\_N= 1.73 , VIF\_S= 4.39

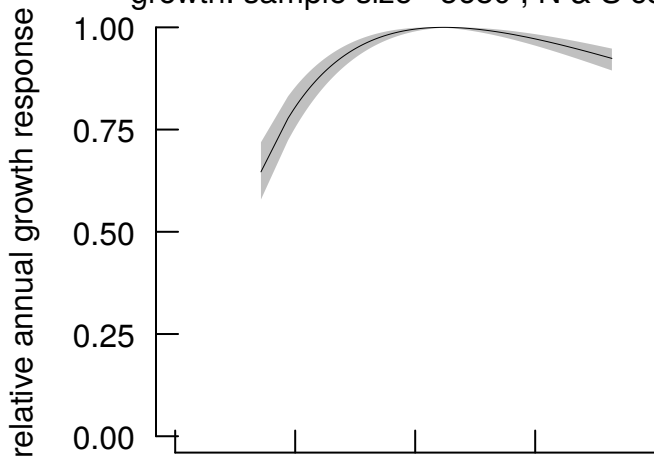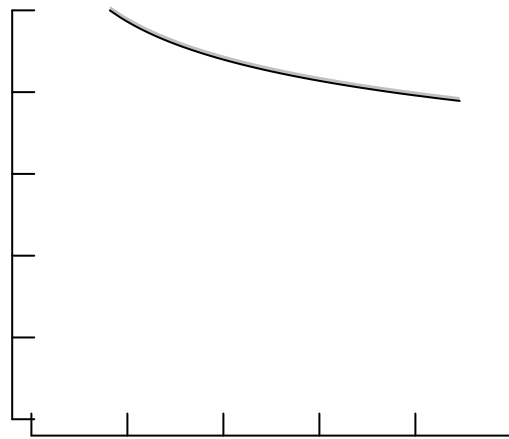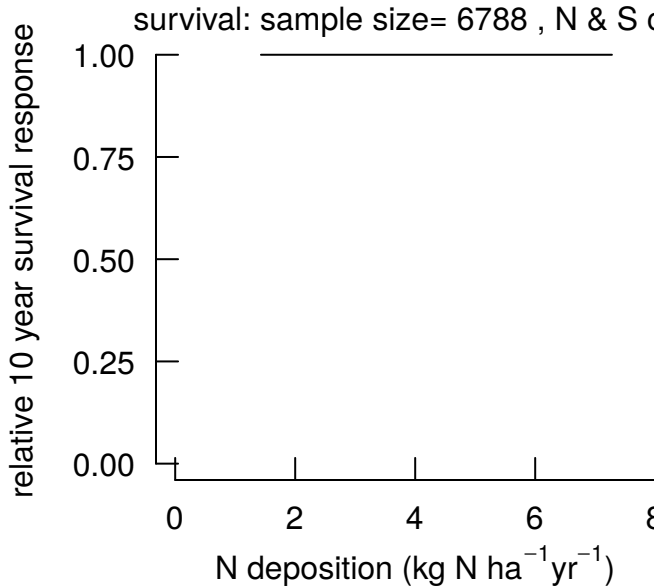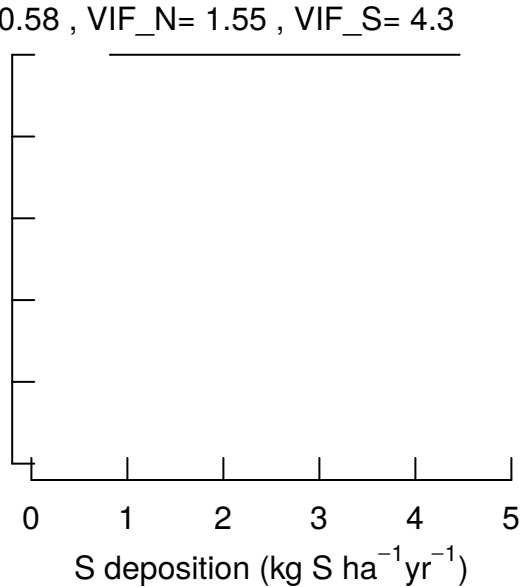

survival: sample size= 6788 , N & S corr.= 0.58 , VIF\_N= 1.55 , VIF\_S= 4.3

**balsam fir**  
*Abies balsamea*

**N deposition**

**S deposition**

growth: sample size= 29334 , N & S corr.= 0.48 , VIF\_N= 2.33 , VIF\_S= 3.23

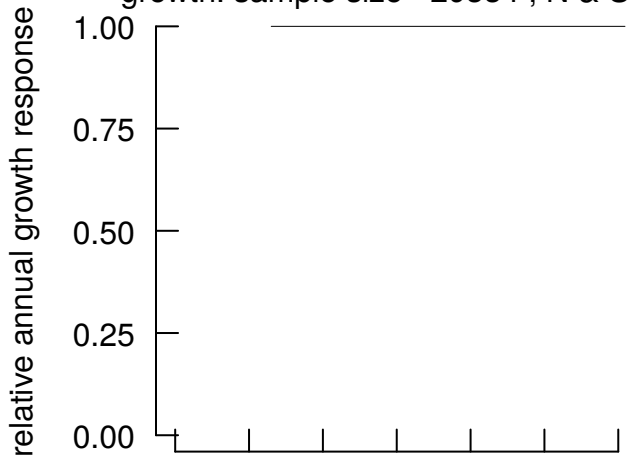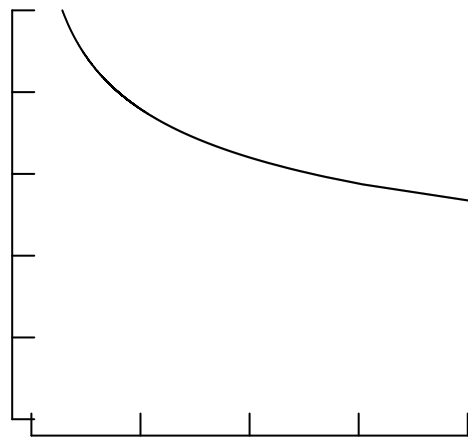

survival: sample size= 34311 , N & S corr.= 0.47 , VIF\_N= 2.29 , VIF\_S= 3.25

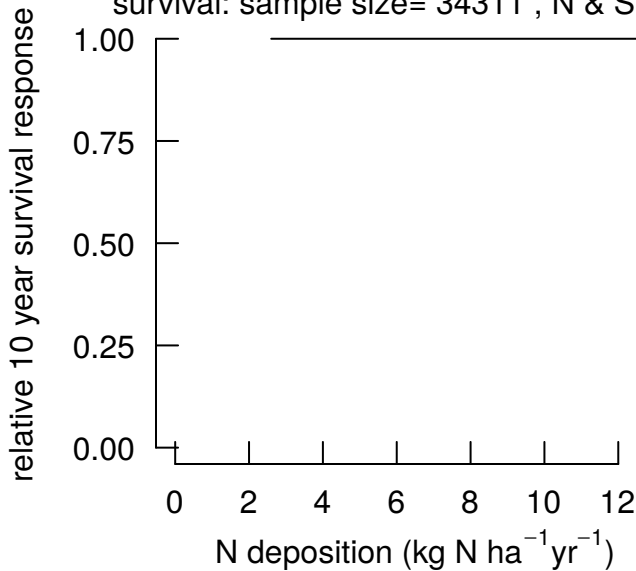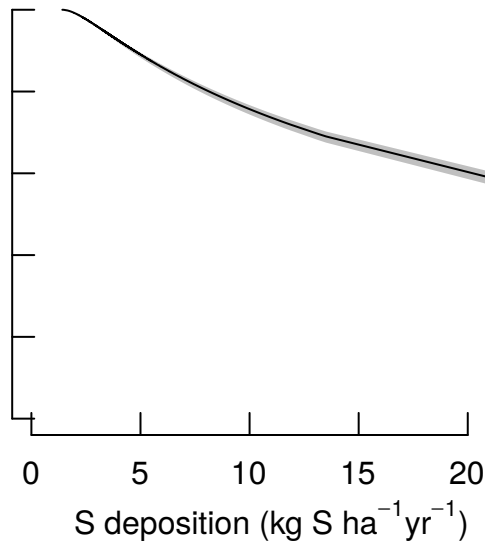

**white fir**  
*Abies concolor*

**N deposition**

**S deposition**

growth: sample size= 9507 , N & S corr.= 0.78 , VIF\_N= 3.04 , VIF\_S= 2.71

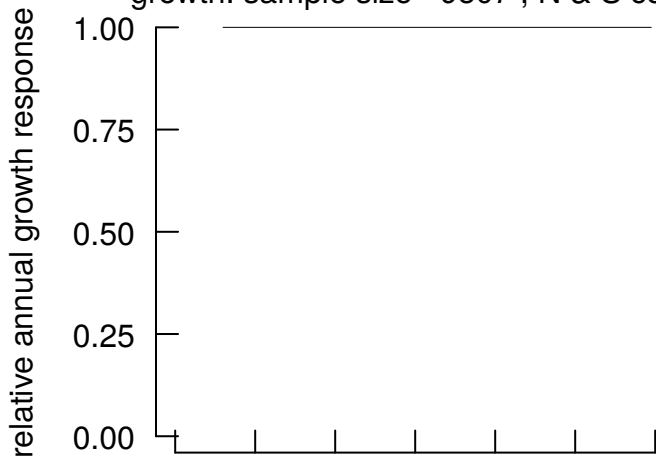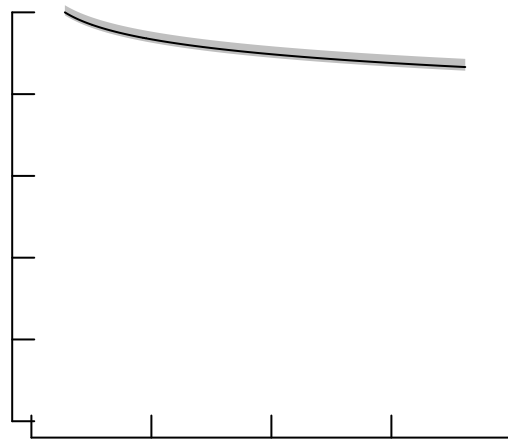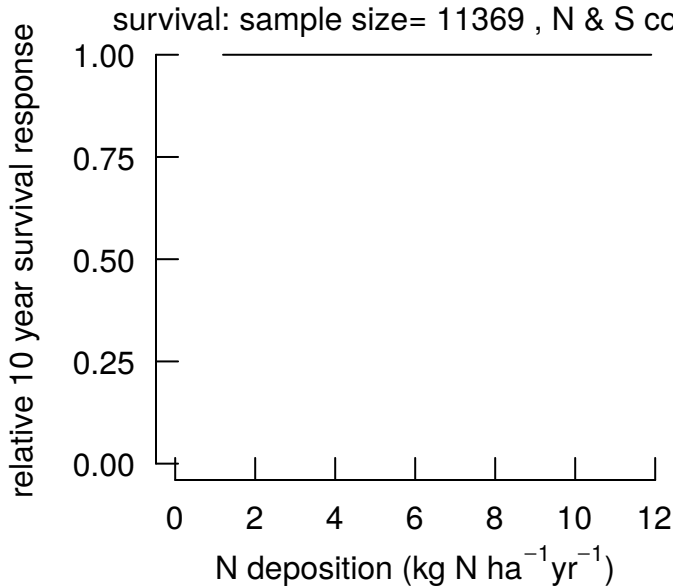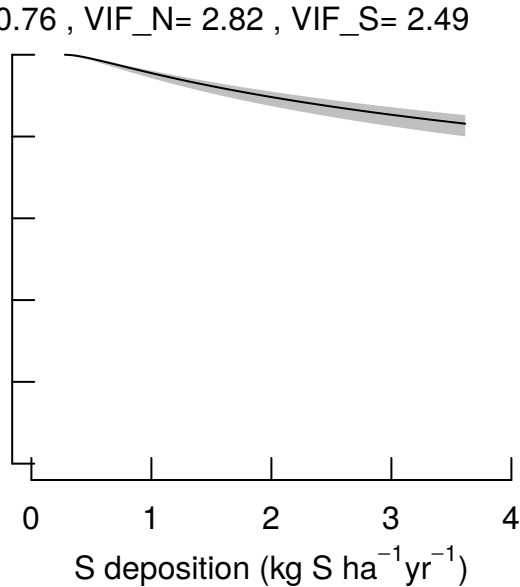

survival: sample size= 11369 , N & S corr.= 0.76 , VIF\_N= 2.82 , VIF\_S= 2.49

**grand fir**  
*Abies grandis*

**N deposition**

**S deposition**

growth: sample size= 6746 , N & S corr.= 0.86 , VIF\_N= 3.88 , VIF\_S= 6.6

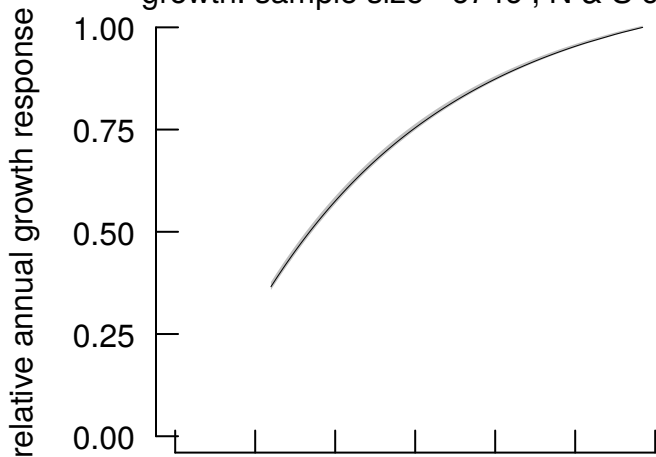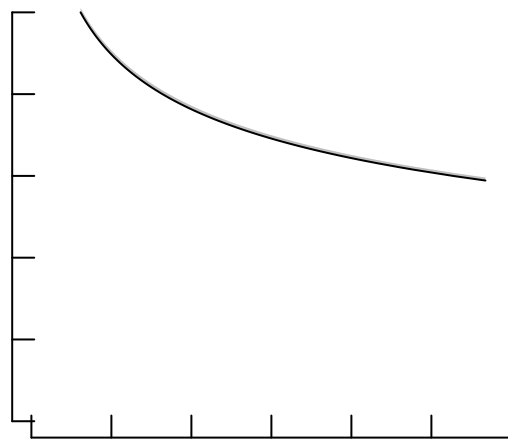

survival: sample size= 7857 , N & S corr.= 0.84 , VIF\_N= 3.5 , VIF\_S= 6.35

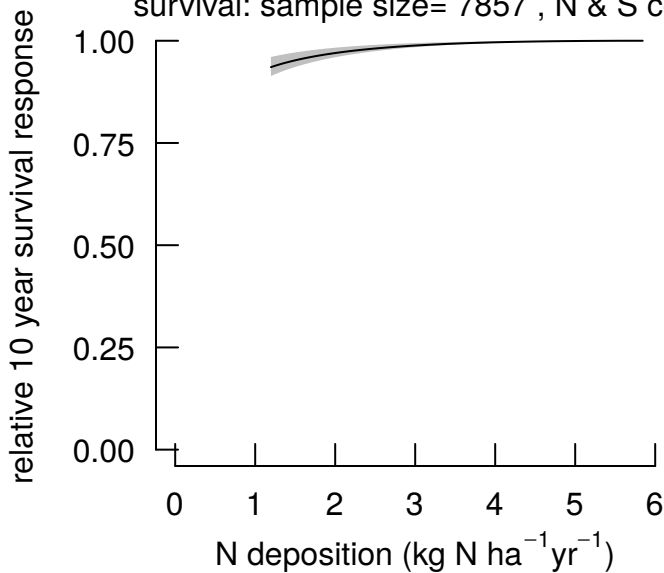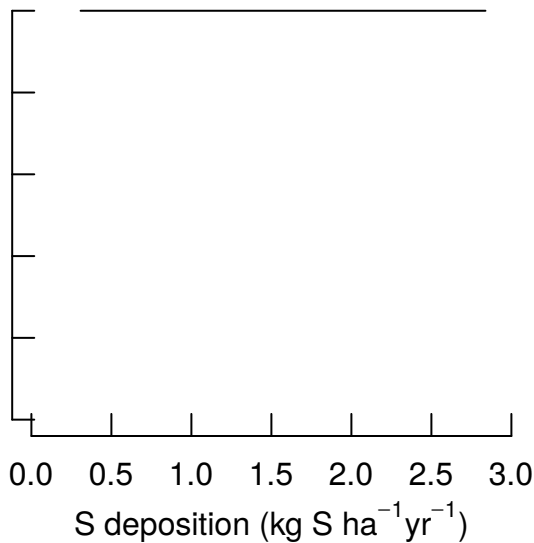

**subalpine fir**  
*Abies lasiocarpa*

**N deposition**

**S deposition**

growth: sample size= 9293 , N & S corr.= 0.74 , VIF\_N= 2.74 , VIF\_S= 3

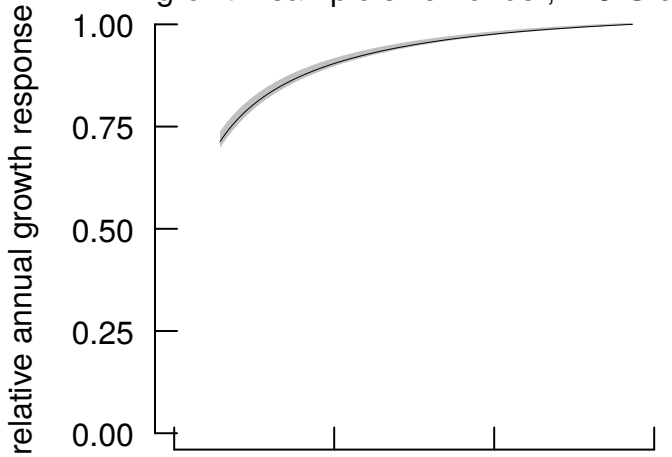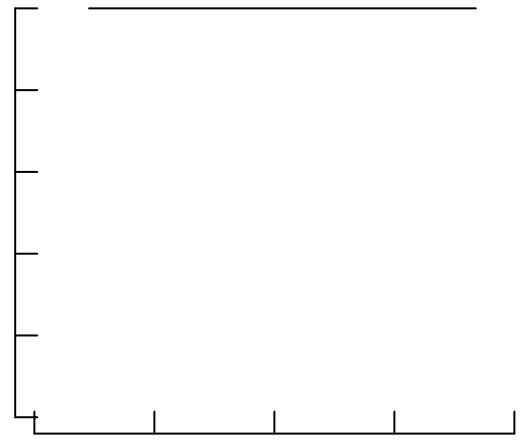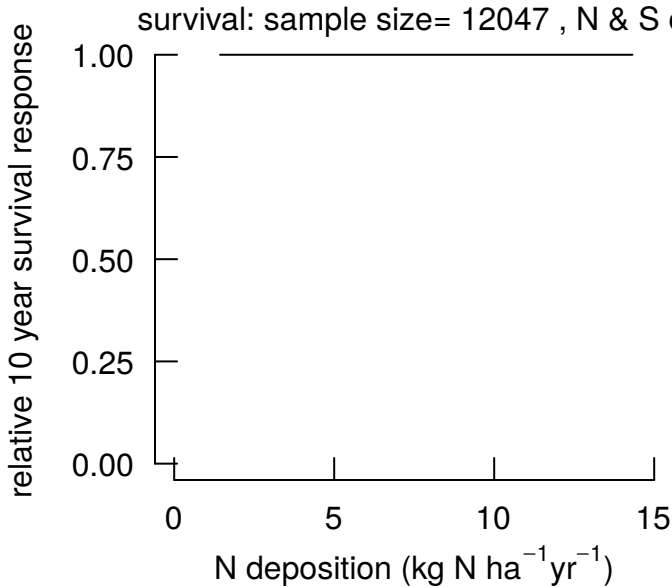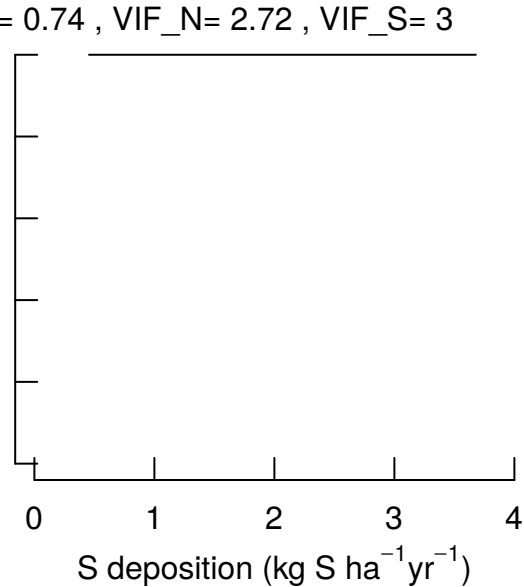

survival: sample size= 12047 , N & S corr.= 0.74 , VIF\_N= 2.72 , VIF\_S= 3

**western juniper**  
*Juniperus occidentalis*

**N deposition**

**S deposition**

growth: sample size= 2023 , N & S corr.= 0.93 , VIF\_N= 8 , VIF\_S= 12.21

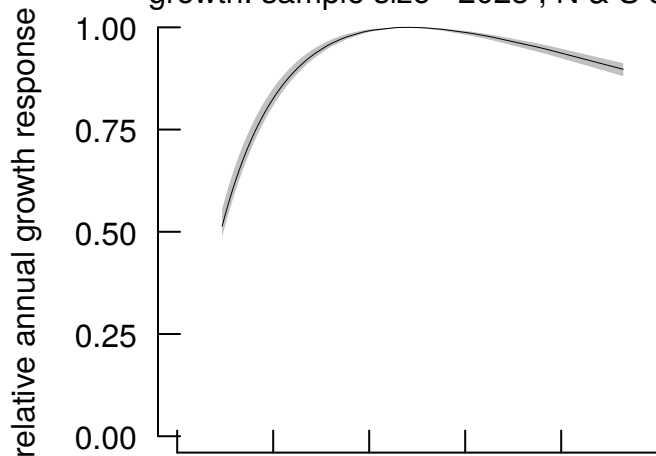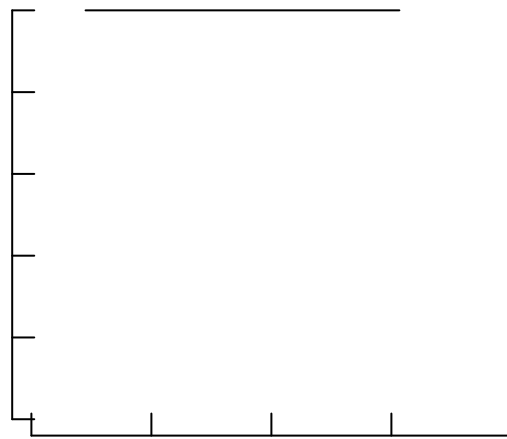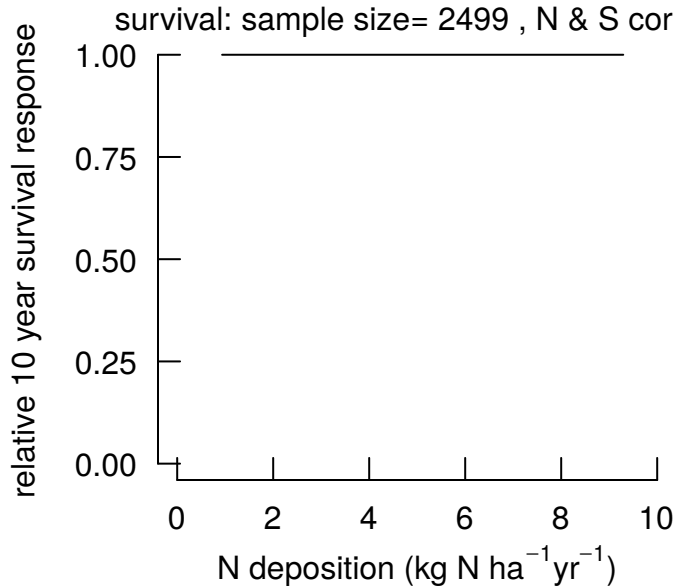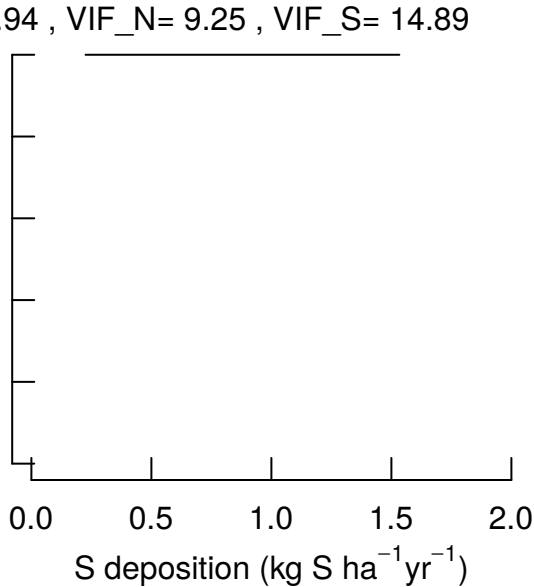

survival: sample size= 2499 , N & S corr.= 0.94 , VIF\_N= 9.25 , VIF\_S= 14.89

**Utah juniper**  
*Juniperus osteosperma*

**N deposition**

**S deposition**

growth: sample size= 11084 , N & S corr.= 0.71 , VIF\_N= 2.35 , VIF\_S= 2.1

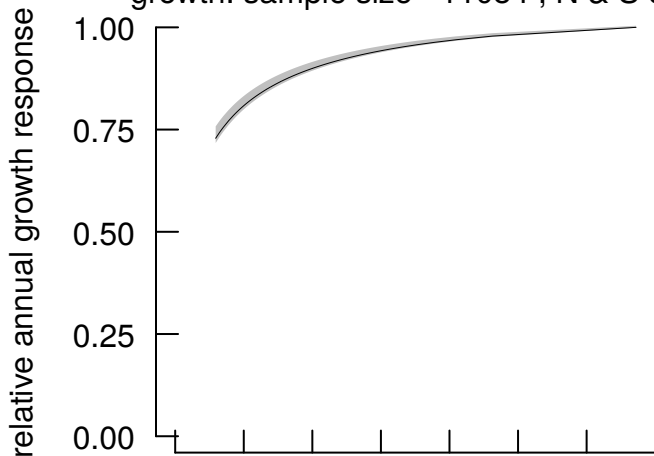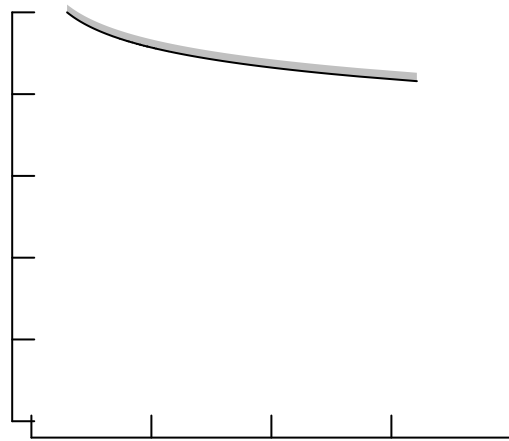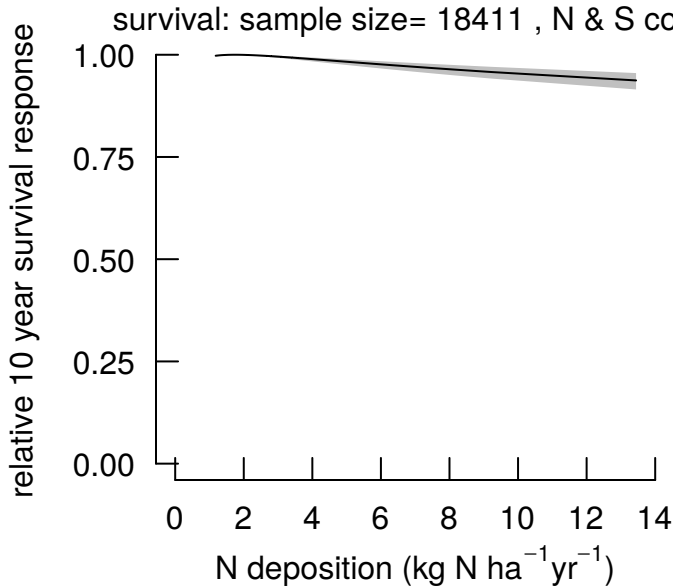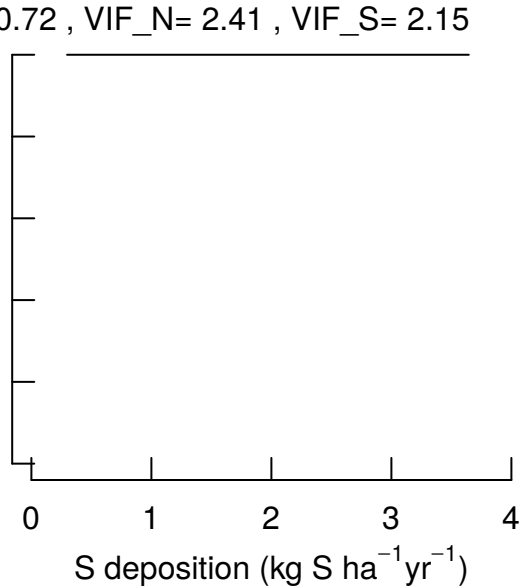



**eastern redcedar**  
*Juniperus virginiana*

**N deposition**

**S deposition**

growth: sample size= 14382 , N & S corr.= 0.3 , VIF\_N= 1.27 , VIF\_S= 1.4

relative annual growth response

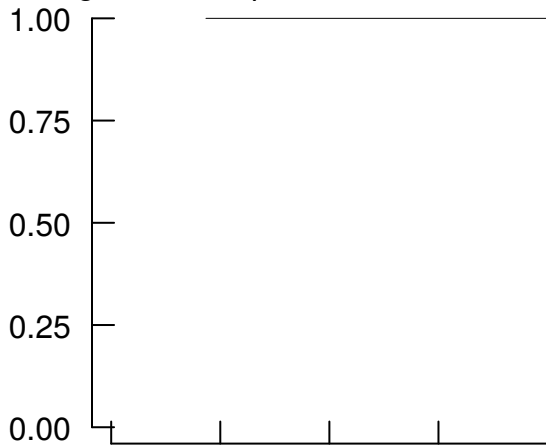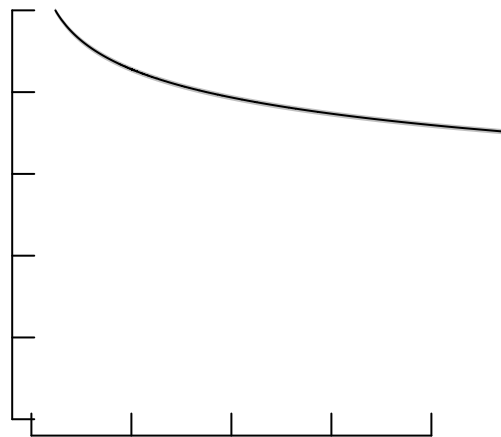

relative 10 year survival response

survival: sample size= 17111 , N & S corr.= 0.3 , VIF\_N= 1.27 , VIF\_S= 1.39

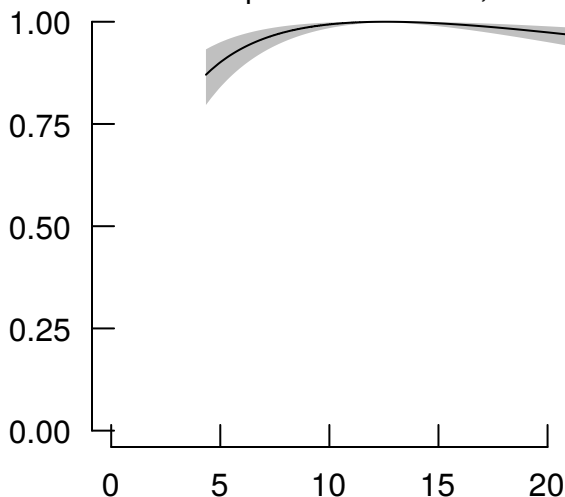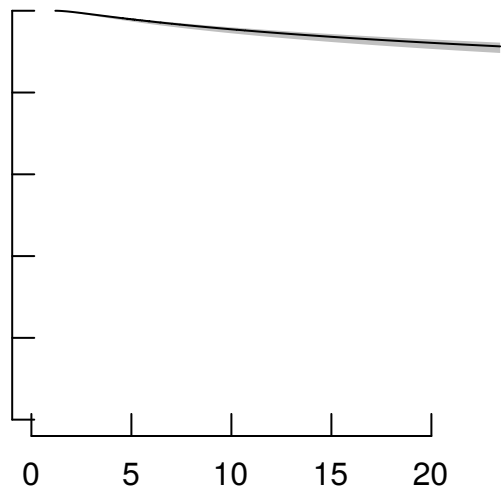

N deposition (kg N ha<sup>-1</sup> yr<sup>-1</sup>)

S deposition (kg S ha<sup>-1</sup> yr<sup>-1</sup>)

# oneseed juniper

*Juniperus monosperma*

## N deposition

## S deposition

growth: sample size= 2047 , N & S corr.= 0.78 , VIF\_N= 4.18 , VIF\_S= 3.4

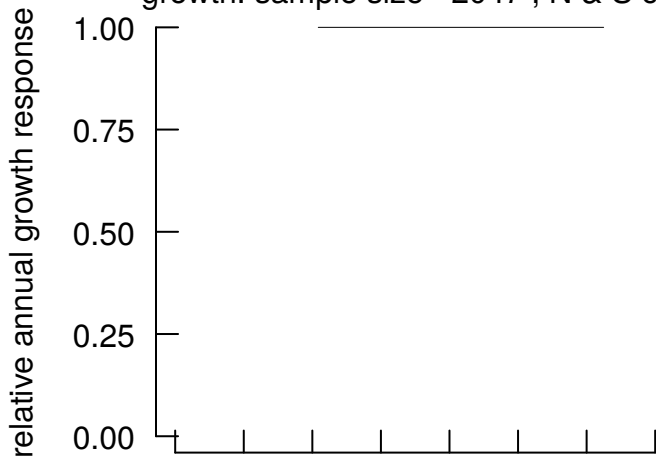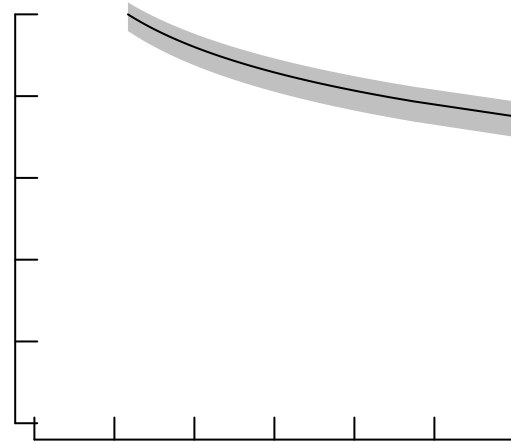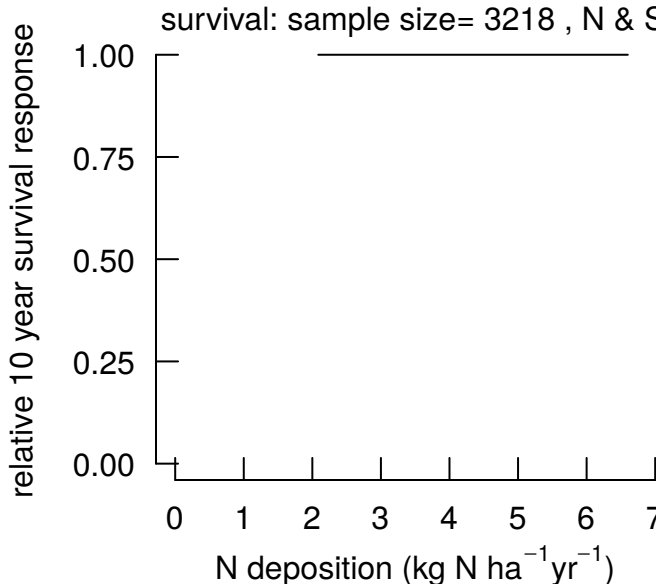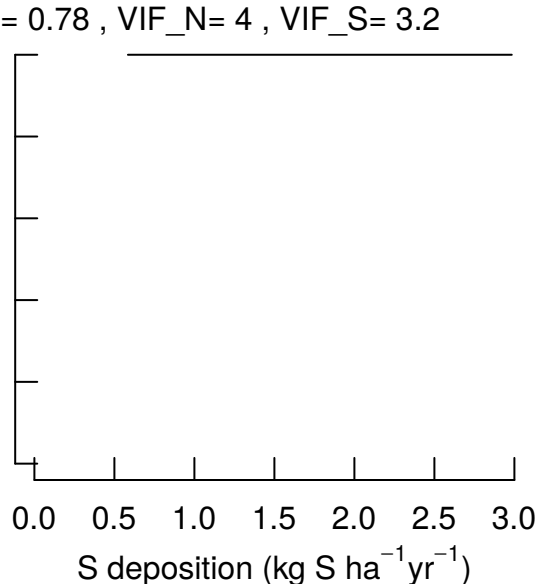

survival: sample size= 3218 , N & S corr.= 0.78 , VIF\_N= 4 , VIF\_S= 3.2

**tamarack (native)**

*Larix laricina*

**N deposition**

**S deposition**

growth: sample size= 8612 , N & S corr.= 0.66 , VIF\_N= 2.72 , VIF\_S= 3.75

relative annual growth response

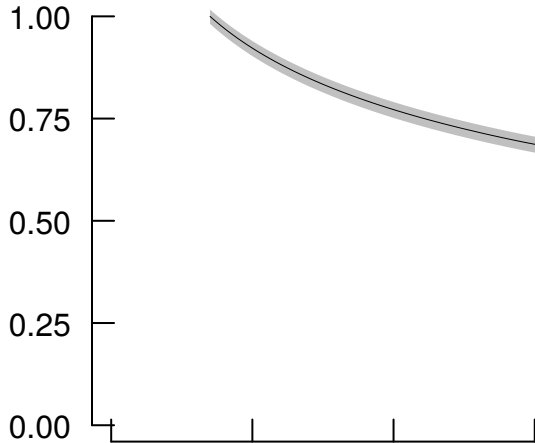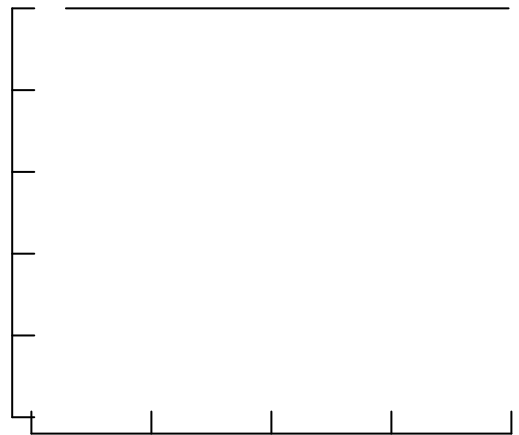

relative 10 year survival response

survival: sample size= 10208 , N & S corr.= 0.66 , VIF\_N= 2.82 , VIF\_S= 3.83

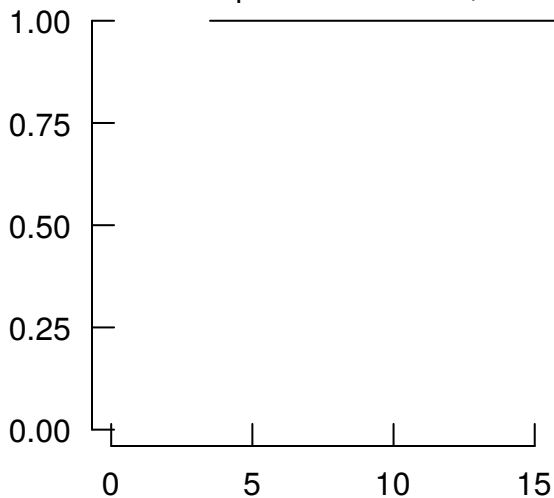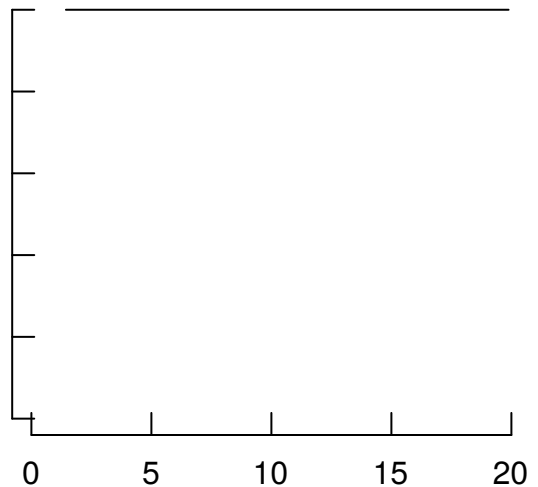

N deposition (kg N ha<sup>-1</sup> yr<sup>-1</sup>)

S deposition (kg S ha<sup>-1</sup> yr<sup>-1</sup>)

**western larch**  
*Larix occidentalis*

**N deposition**

**S deposition**

growth: sample size= 2321 , N & S corr.= 0.9 , VIF\_N= 6.21 , VIF\_S= 6.21

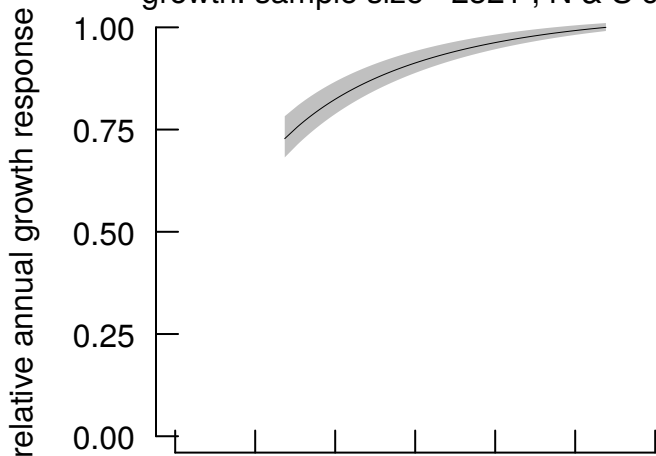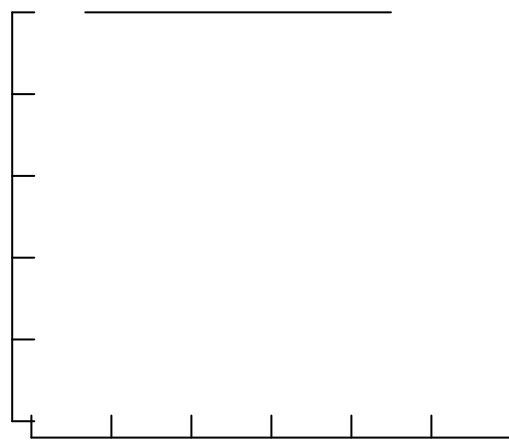

survival: sample size= 2856 , N & S corr.= 0.9 , VIF\_N= 5.89 , VIF\_S= 5.93

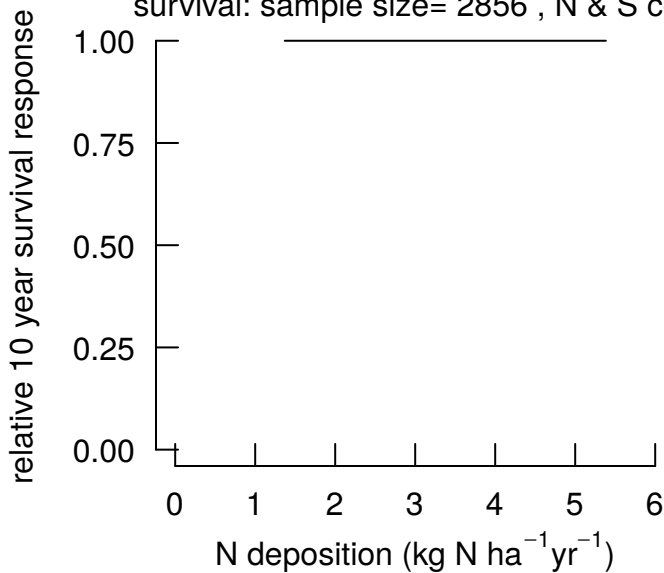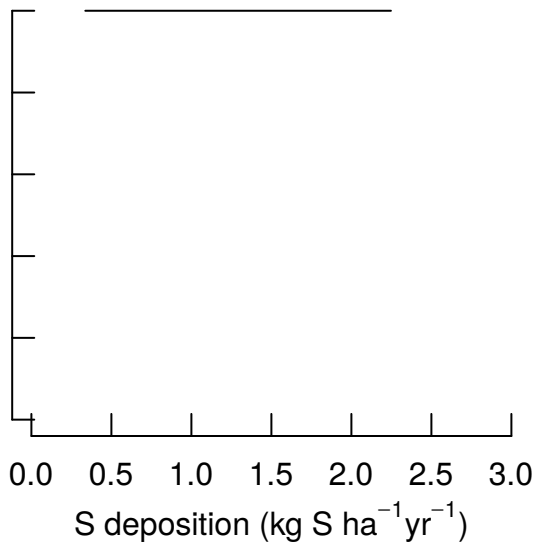

**incense-cedar**  
*Calocedrus decurrens*

**N deposition**

**S deposition**

growth: sample size= 3004 , N & S corr.= 0.83 , VIF\_N= 7.49 , VIF\_S= 10.29

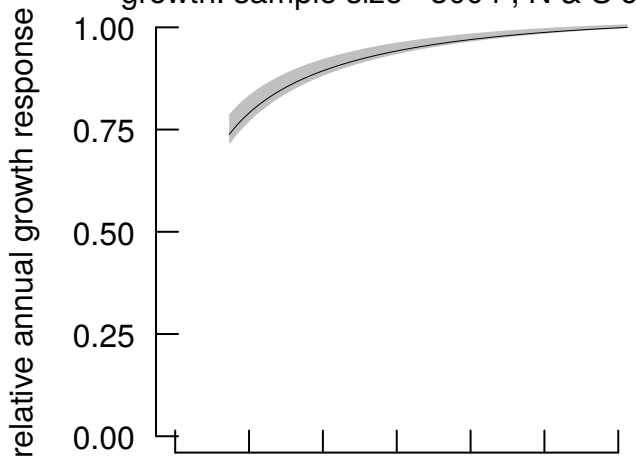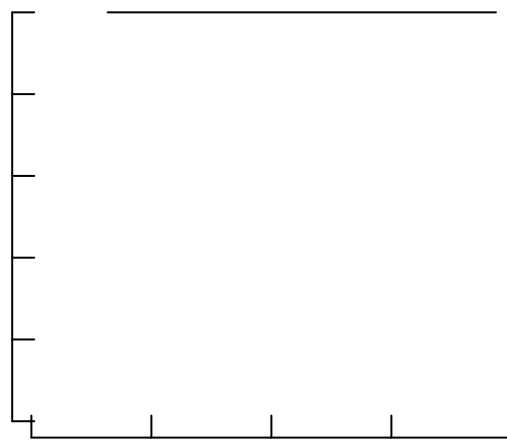

survival: sample size= 3646 , N & S corr.= 0.82 , VIF\_N= 7.28 , VIF\_S= 10.08

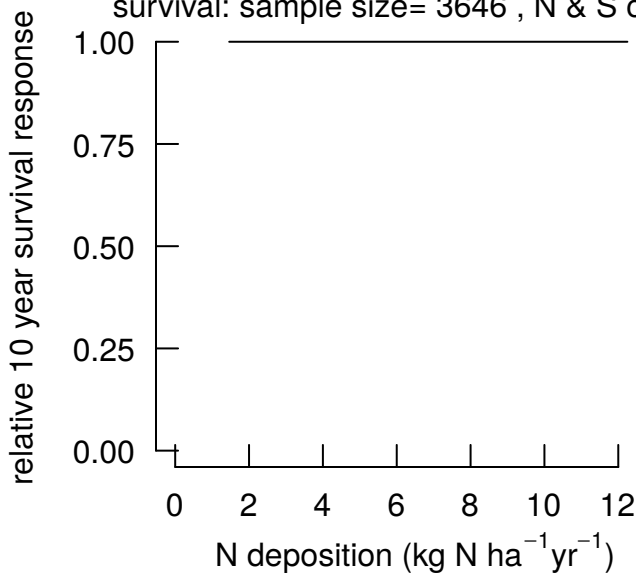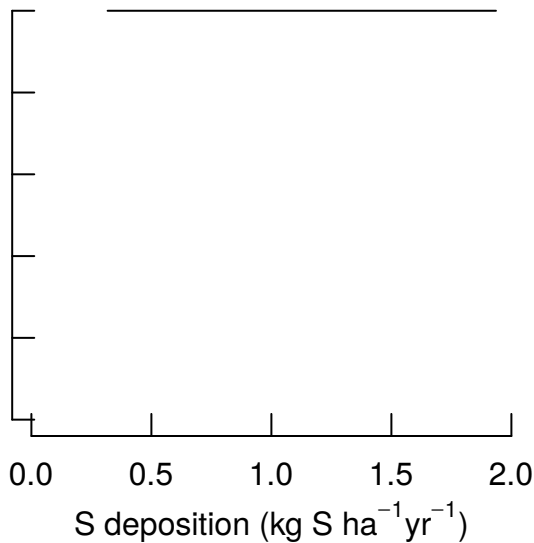

# Engelmann spruce

*Picea engelmannii*

## N deposition

## S deposition

growth: sample size= 8670 , N & S corr.= 0.84 , VIF\_N= 3.38 , VIF\_S= 3.54

relative annual growth response

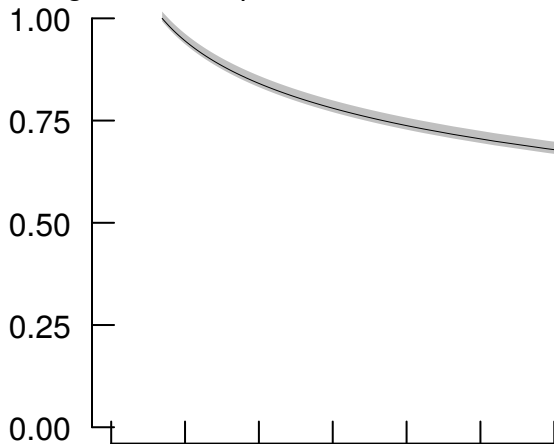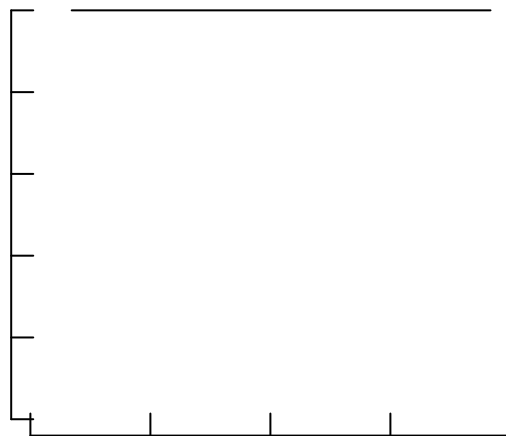

relative 10 year survival response

survival: sample size= 11779 , N & S corr.= 0.83 , VIF\_N= 3.29 , VIF\_S= 3.42

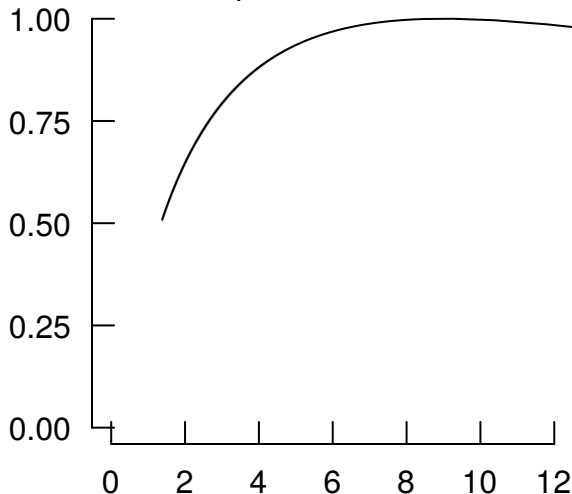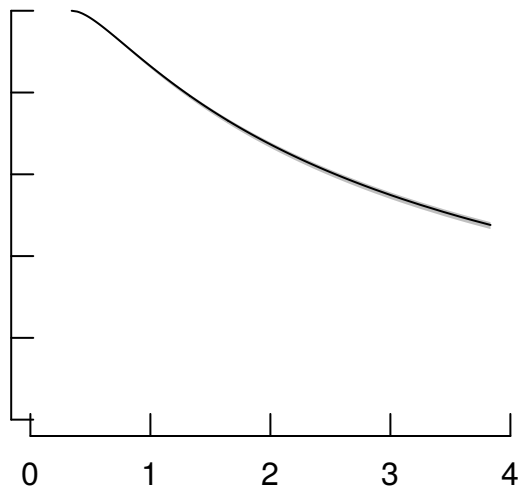

N deposition (kg N ha<sup>-1</sup> yr<sup>-1</sup>)

S deposition (kg S ha<sup>-1</sup> yr<sup>-1</sup>)

# white spruce

*Picea glauca*

## N deposition

## S deposition

growth: sample size= 5935 , N & S corr.= 0.43 , VIF\_N= 1.99 , VIF\_S= 1.81

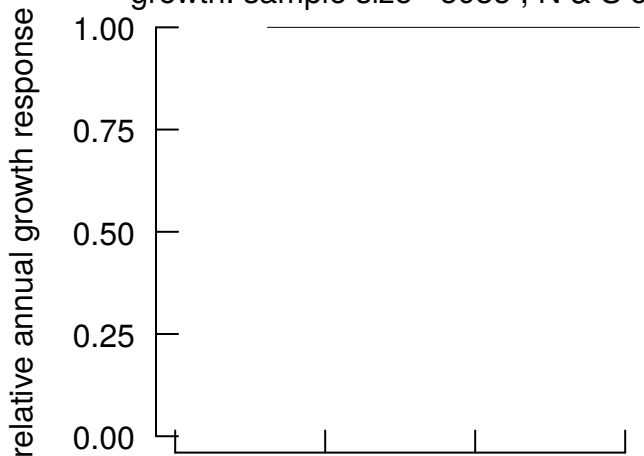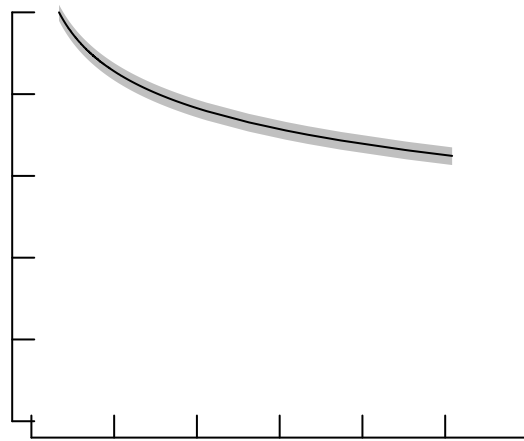

survival: sample size= 6661 , N & S corr.= 0.43 , VIF\_N= 1.97 , VIF\_S= 1.78

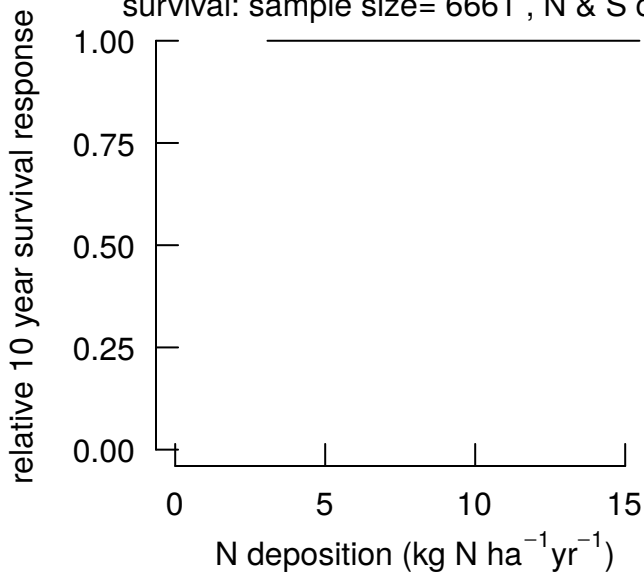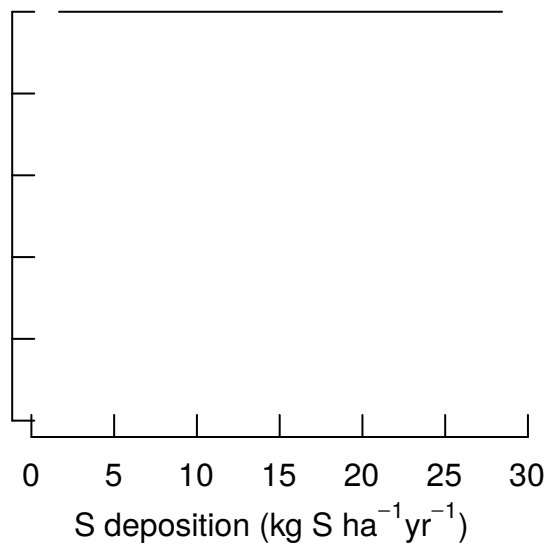

# black spruce

*Picea mariana*

## N deposition

## S deposition

growth: sample size= 13309 , N & S corr.= 0.55 , VIF\_N= 2.73 , VIF\_S= 4.01

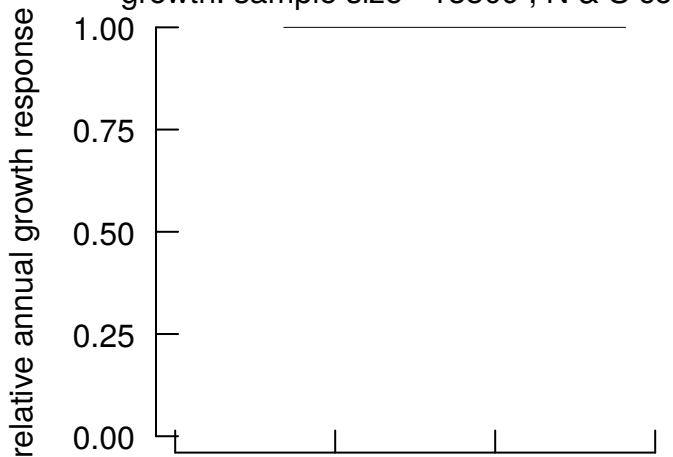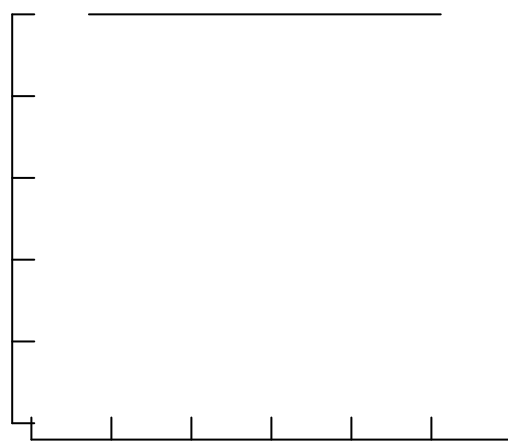

survival: sample size= 15736 , N & S corr.= 0.56 , VIF\_N= 2.79 , VIF\_S= 4.12

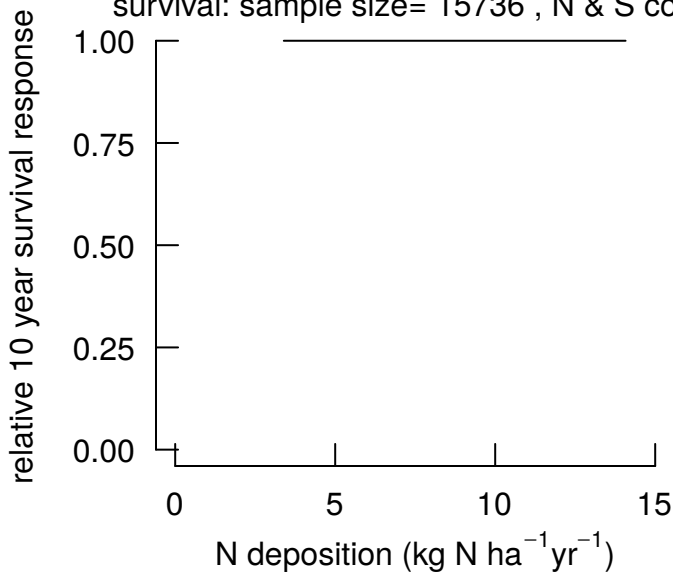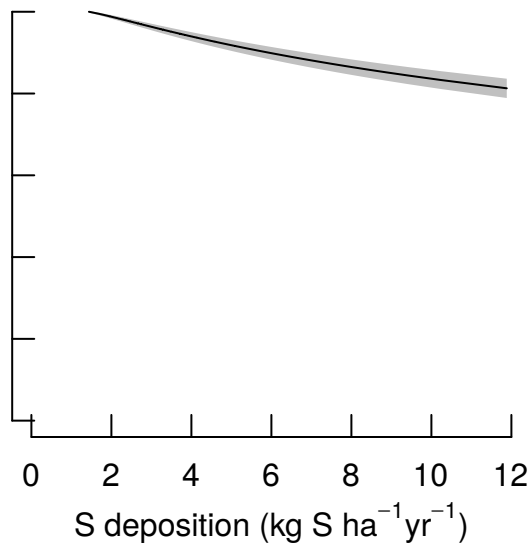



**red spruce**  
*Picea rubens*

**N deposition**

**S deposition**

growth: sample size= 12001 , N & S corr.= 0.84 , VIF\_N= 3.77 , VIF\_S= 3.62

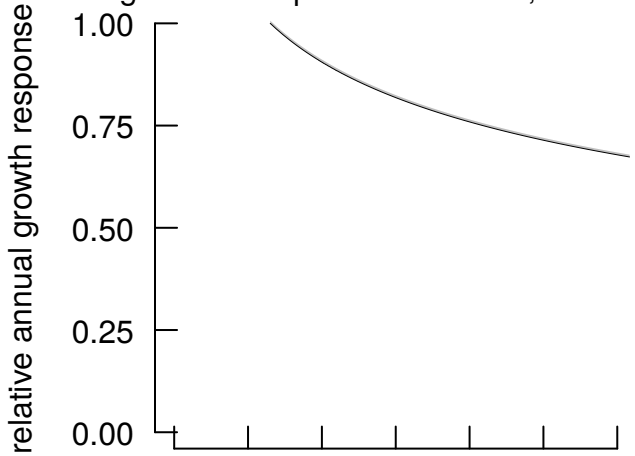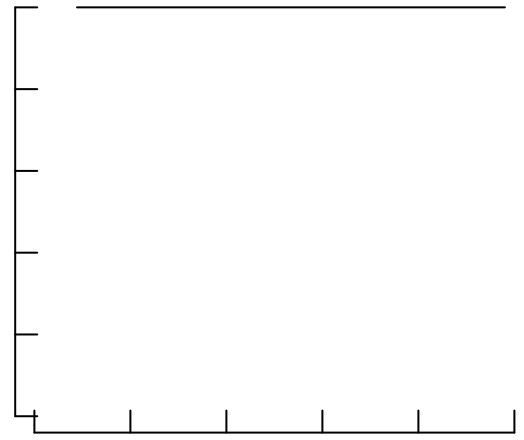

survival: sample size= 13511 , N & S corr.= 0.84 , VIF\_N= 3.86 , VIF\_S= 3.66

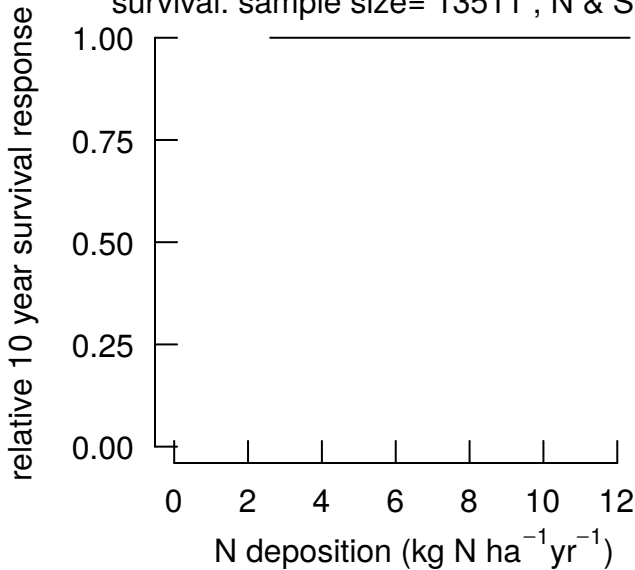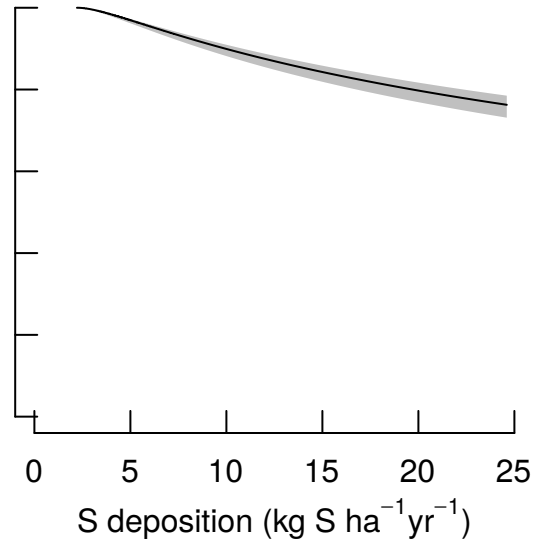

**jack pine**  
*Pinus banksiana*

**N deposition**

**S deposition**

growth: sample size= 5613 , N & S corr.= 0.61 , VIF\_N= 3.45 , VIF\_S= 2.51

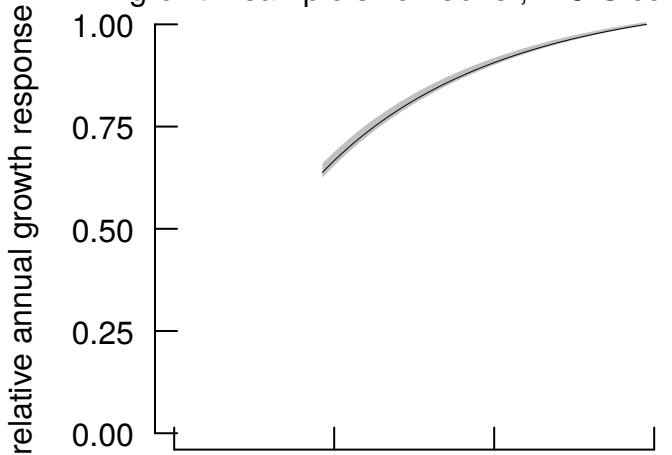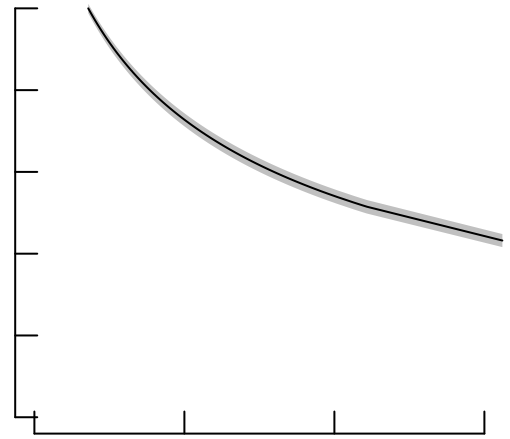

survival: sample size= 6916 , N & S corr.= 0.61 , VIF\_N= 3.43 , VIF\_S= 2.58

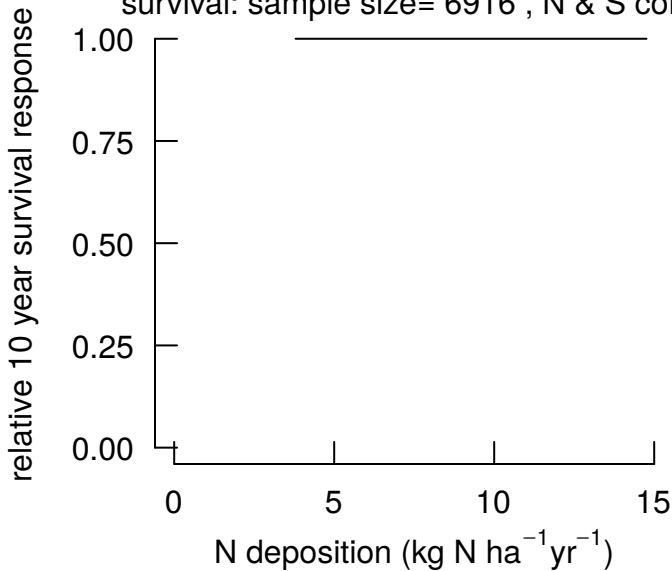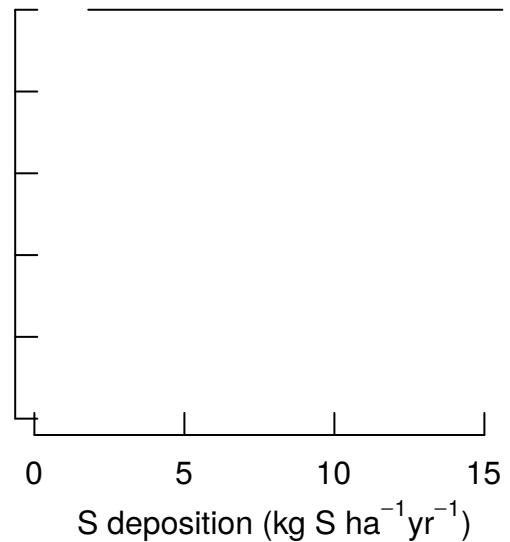

# common or two-needle pinyon

*Pinus edulis*

## N deposition

## S deposition

growth: sample size= 7570 , N & S corr.= 0.78 , VIF\_N= 3.16 , VIF\_S= 2.63

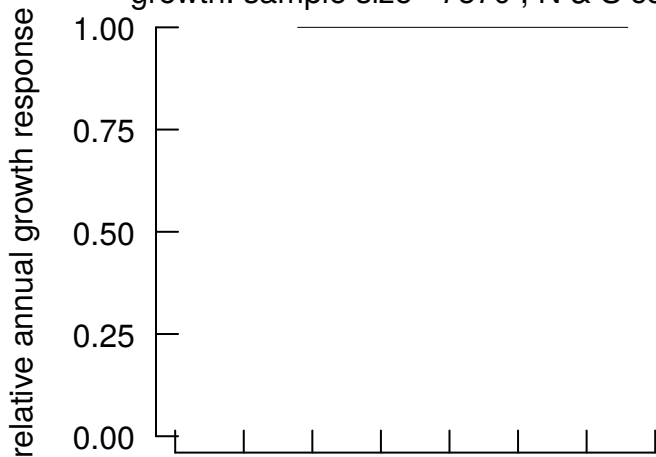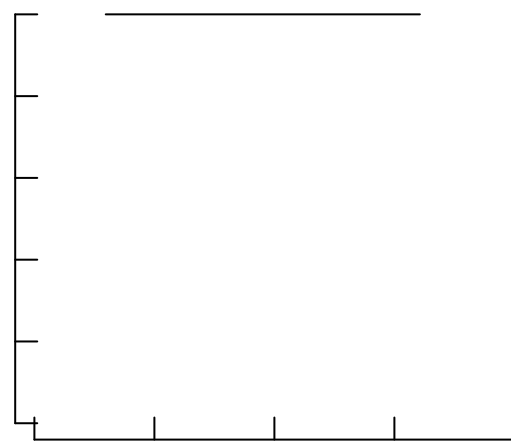

survival: sample size= 11270 , N & S corr.= 0.8 , VIF\_N= 3.33 , VIF\_S= 2.78

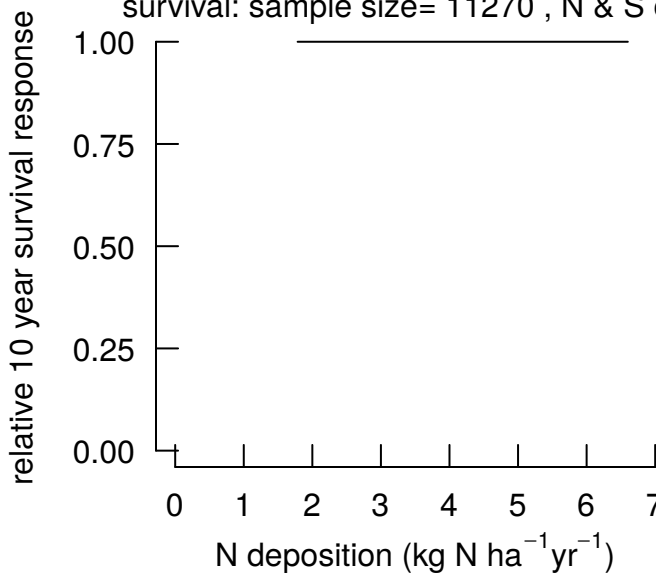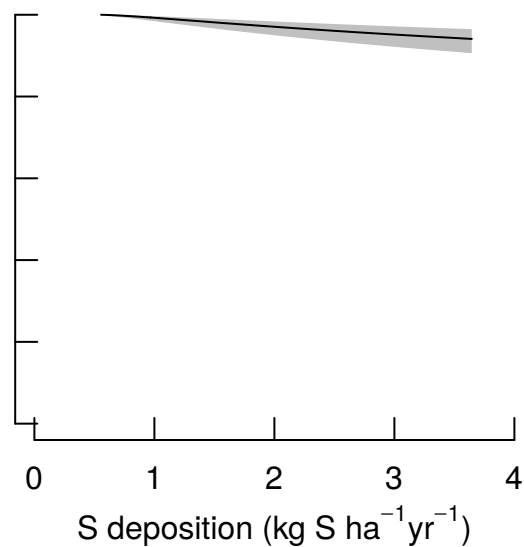

# lodgepole pine

*Pinus contorta*

## N deposition

## S deposition

growth: sample size= 17352 , N & S corr.= 0.76 , VIF\_N= 2.42 , VIF\_S= 3.22

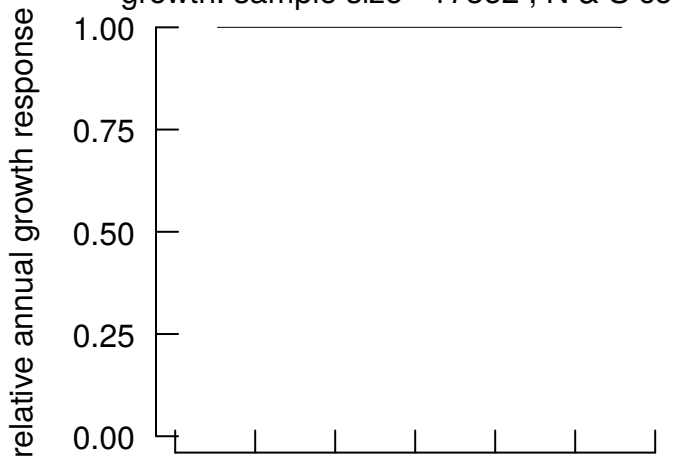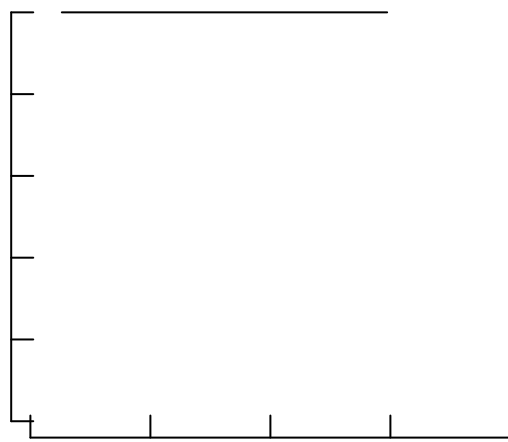

survival: sample size= 27788 , N & S corr.= 0.75 , VIF\_N= 2.38 , VIF\_S= 3.09

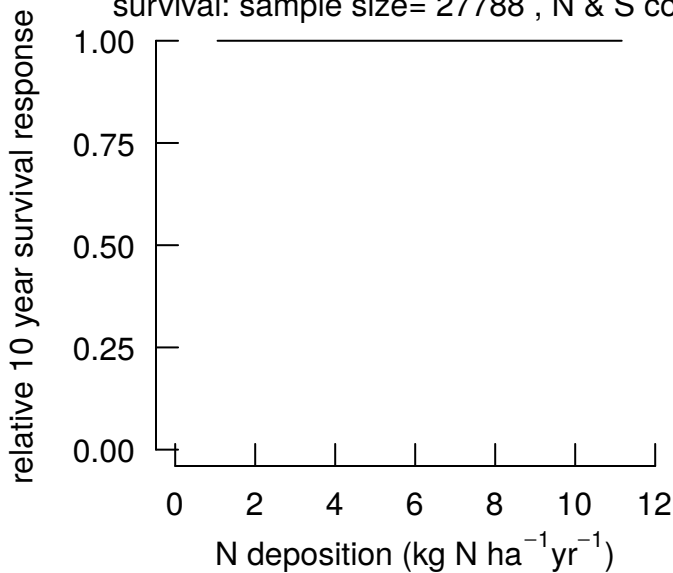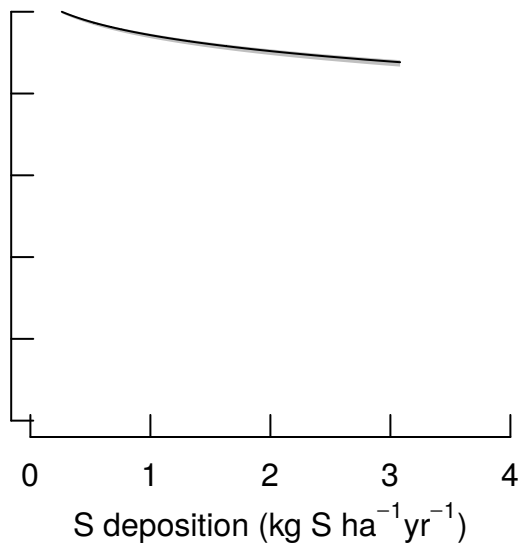

# shortleaf pine

*Pinus echinata*

## N deposition

## S deposition

growth: sample size= 13278 , N & S corr.= 0.16 , VIF\_N= 1.15 , VIF\_S= 1.04

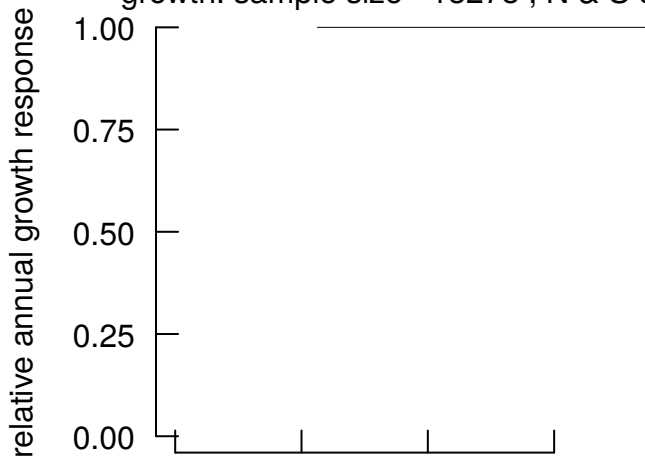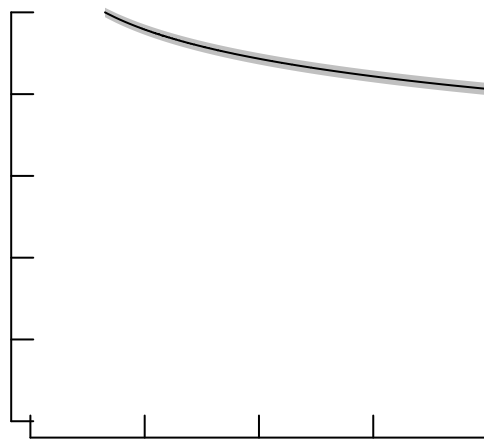

survival: sample size= 16915 , N & S corr.= 0.18 , VIF\_N= 1.16 , VIF\_S= 1.06

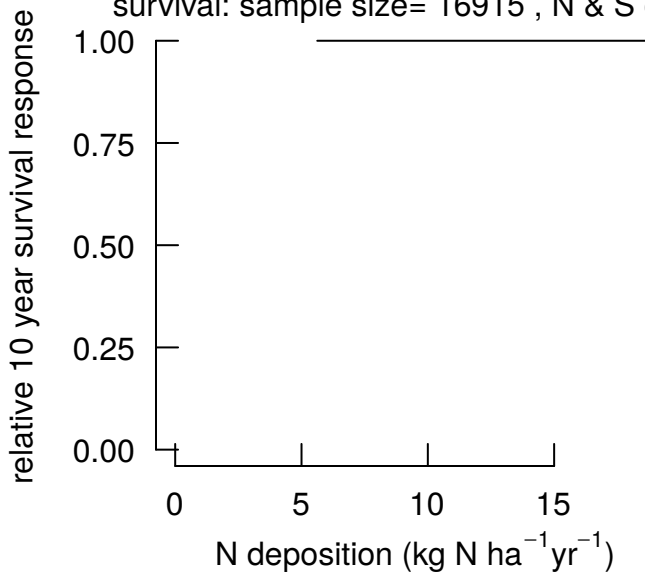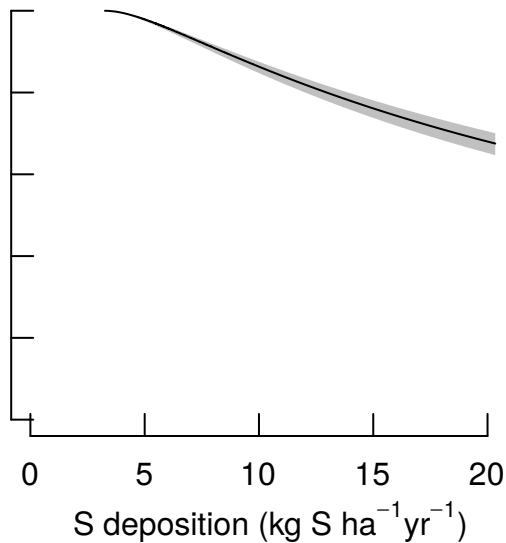

**slash pine**  
*Pinus elliottii*

**N deposition**

**S deposition**

growth: sample size= 9945 , N & S corr.= 0.46 , VIF\_N= 1.39 , VIF\_S= 1.83

relative annual growth response

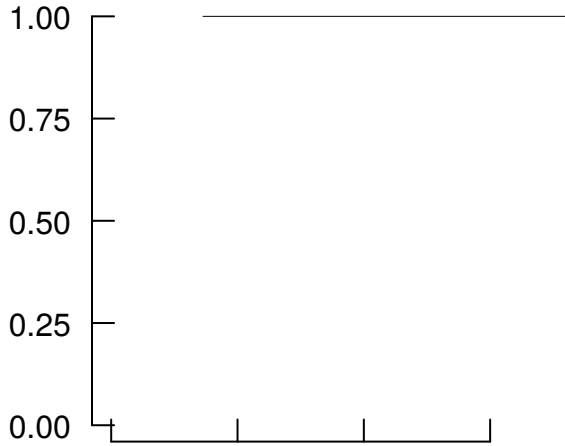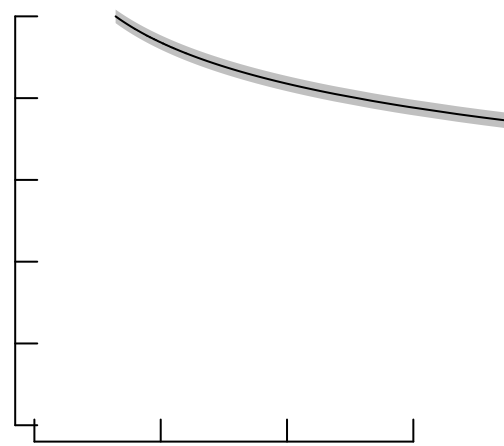

relative 10 year survival response

survival: sample size= 11857 , N & S corr.= 0.44 , VIF\_N= 1.35 , VIF\_S= 1.8

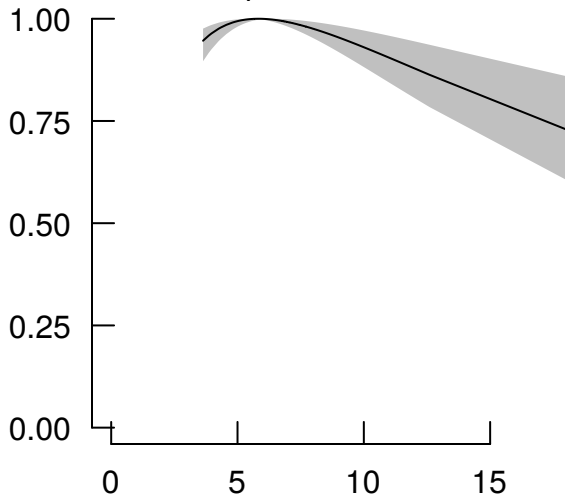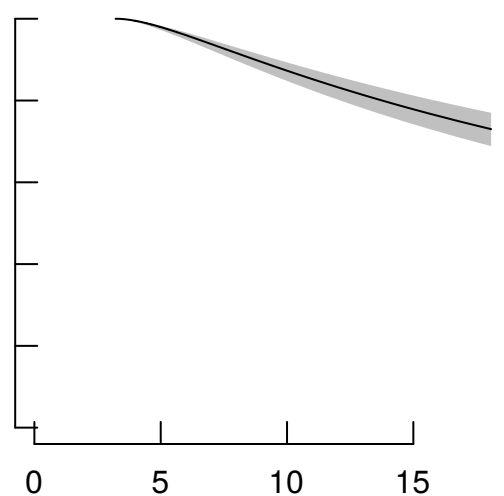

N deposition (kg N ha<sup>-1</sup>yr<sup>-1</sup>)

S deposition (kg S ha<sup>-1</sup>yr<sup>-1</sup>)

**longleaf pine**  
*Pinus palustris*

**N deposition**

**S deposition**

growth: sample size= 4635 , N & S corr.= 0.45 , VIF\_N= 1.79 , VIF\_S= 1.81

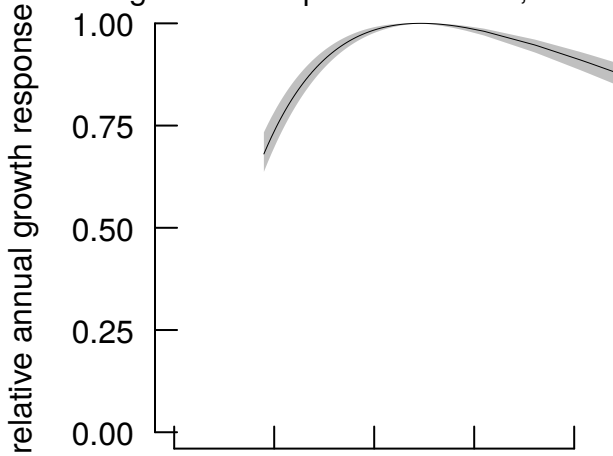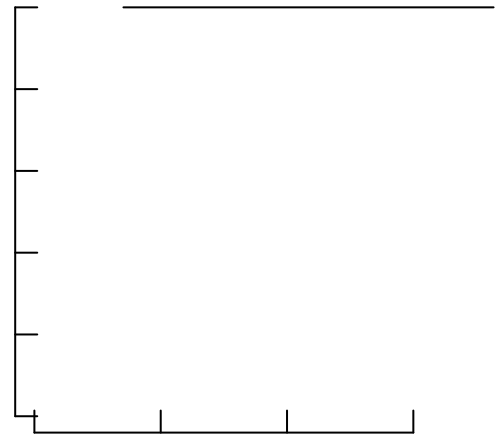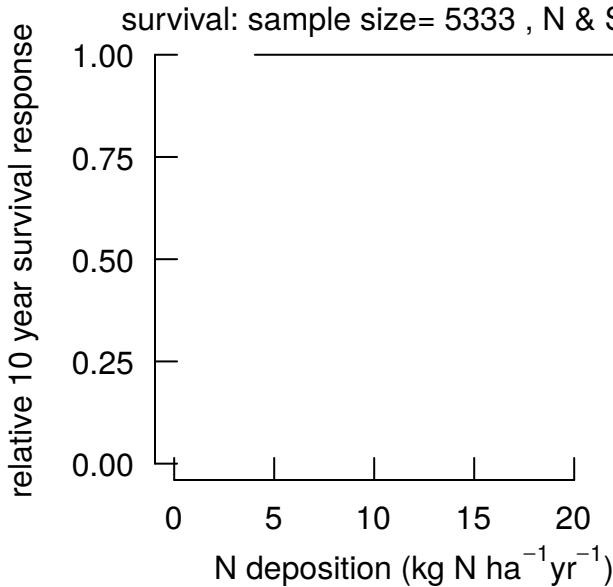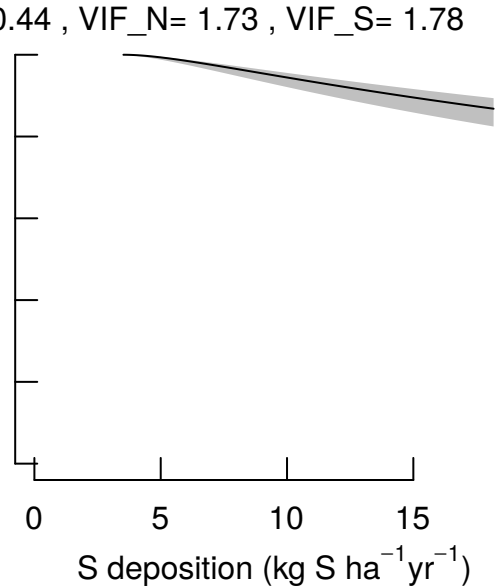

survival: sample size= 5333 , N & S corr.= 0.44 , VIF\_N= 1.73 , VIF\_S= 1.78

# ponderosa pine

*Pinus ponderosa*

## N deposition

## S deposition

growth: sample size= 24132 , N & S corr.= 0.9 , VIF\_N= 6.51 , VIF\_S= 5.89

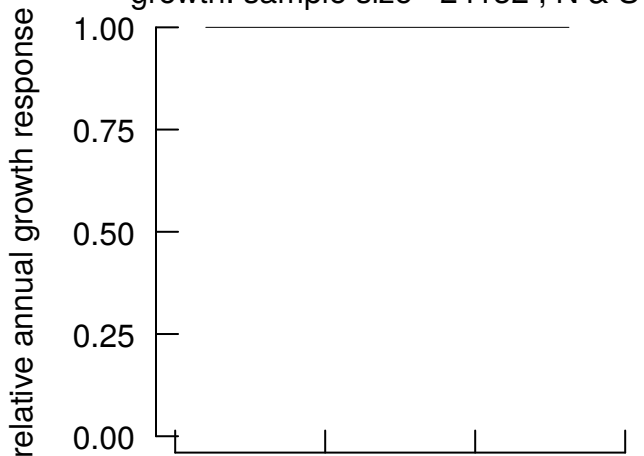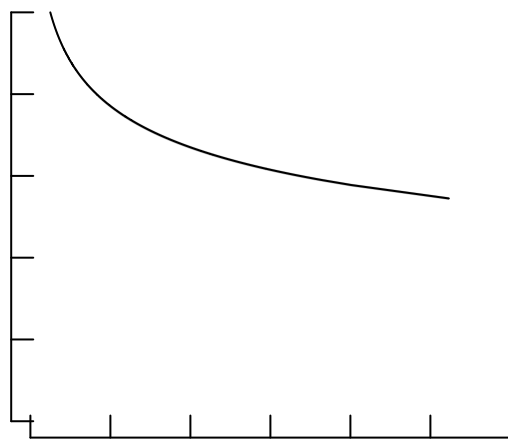

survival: sample size= 28972 , N & S corr.= 0.88 , VIF\_N= 5.83 , VIF\_S= 5.19

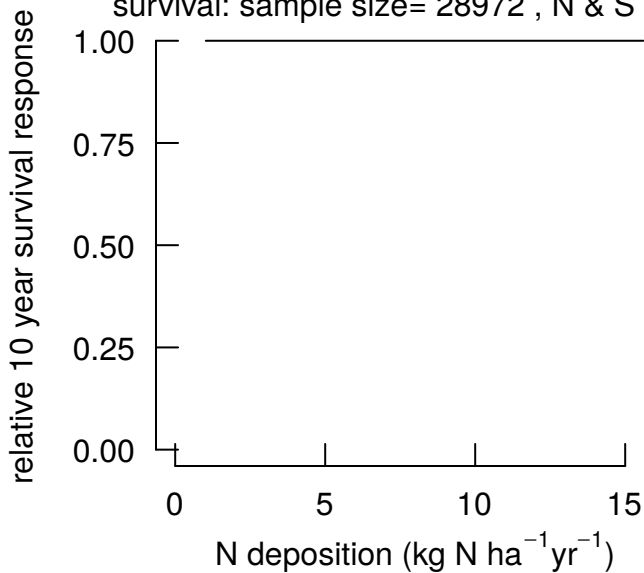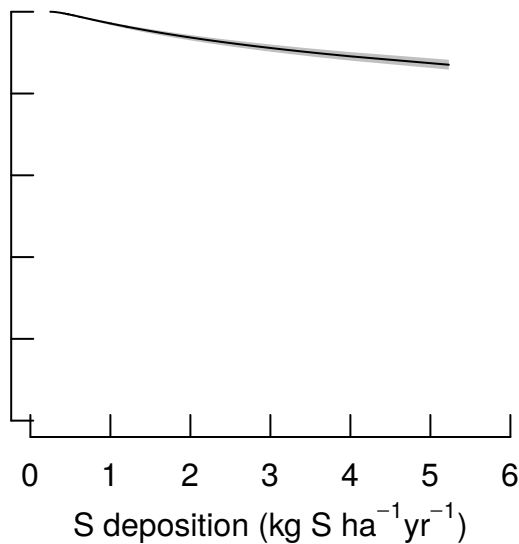



# red pine

*Pinus resinosa*

## N deposition

## S deposition

growth: sample size= 8917 , N & S corr.= 0.53 , VIF\_N= 2.4 , VIF\_S= 1.97

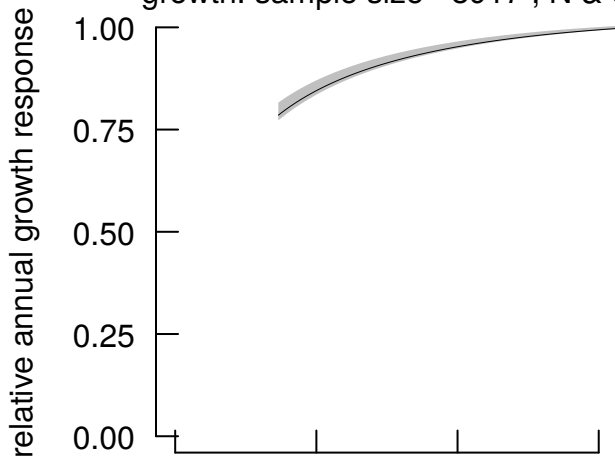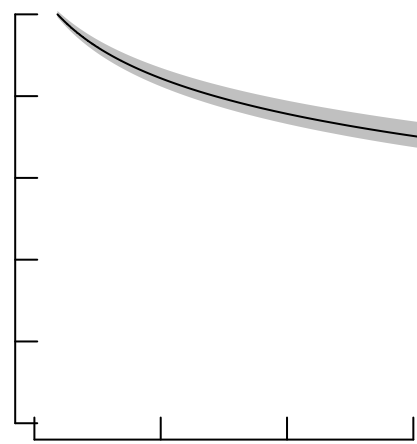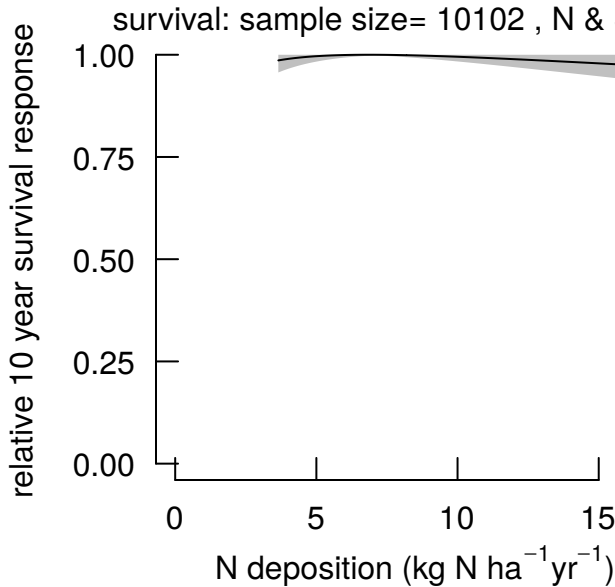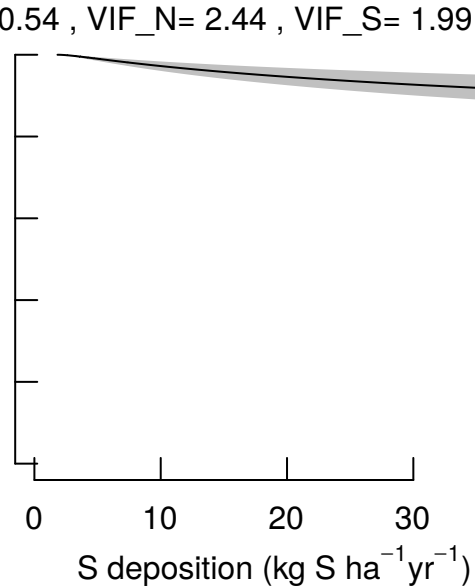

**pitch pine**  
*Pinus rigida*

**N deposition**

**S deposition**

growth: sample size= 2578 , N & S corr.= 0.66 , VIF\_N= 2.27 , VIF\_S= 2.21

relative annual growth response

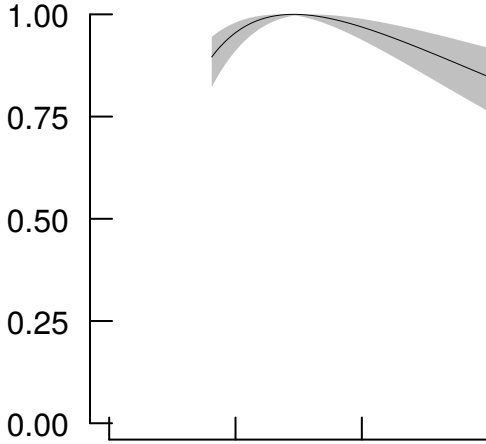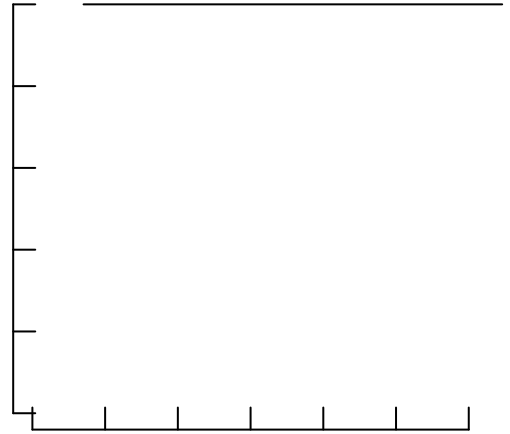

relative 10 year survival response

survival: sample size= 3149 , N & S corr.= 0.65 , VIF\_N= 2.16 , VIF\_S= 2.15

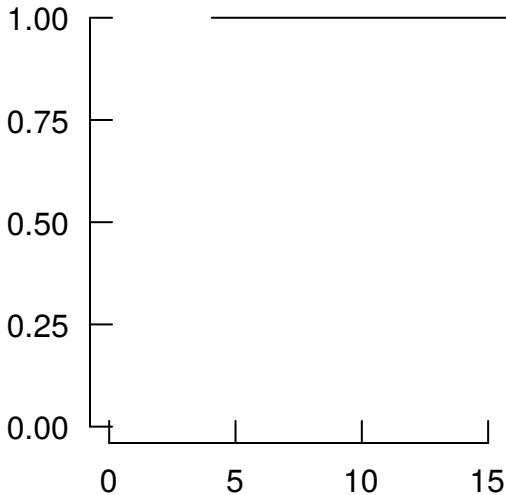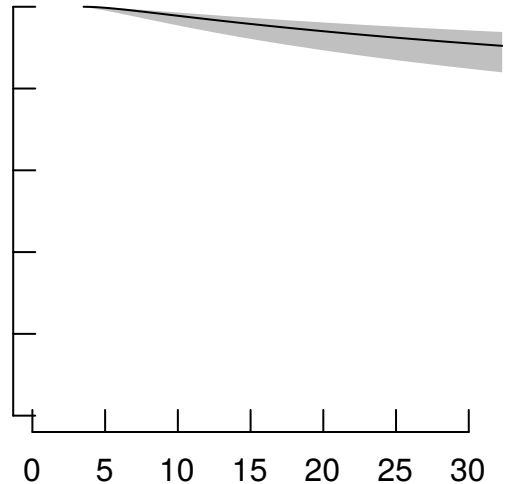

N deposition (kg N ha<sup>-1</sup> yr<sup>-1</sup>)

S deposition (kg S ha<sup>-1</sup> yr<sup>-1</sup>)

# eastern white pine

*Pinus strobus*

## N deposition

## S deposition

growth: sample size= 20474 , N & S corr.= 0.59 , VIF\_N= 2.17 , VIF\_S= 1.81

relative annual growth response

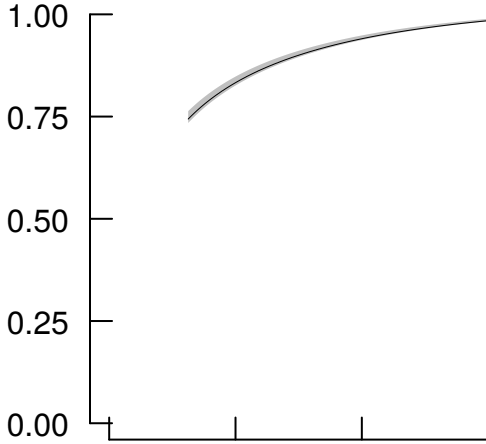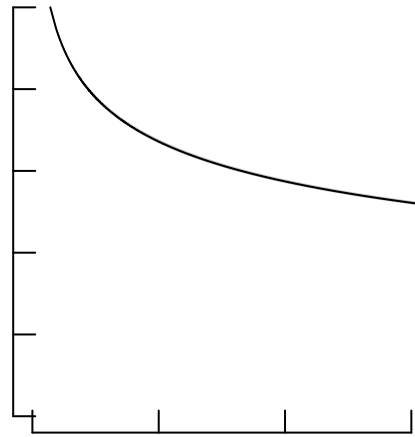

relative 10 year survival response

survival: sample size= 23371 , N & S corr.= 0.6 , VIF\_N= 2.15 , VIF\_S= 1.81

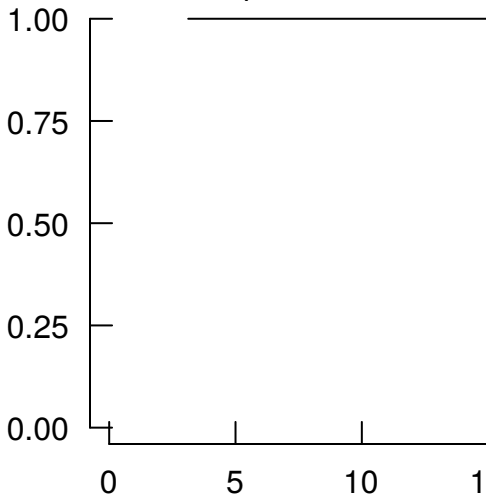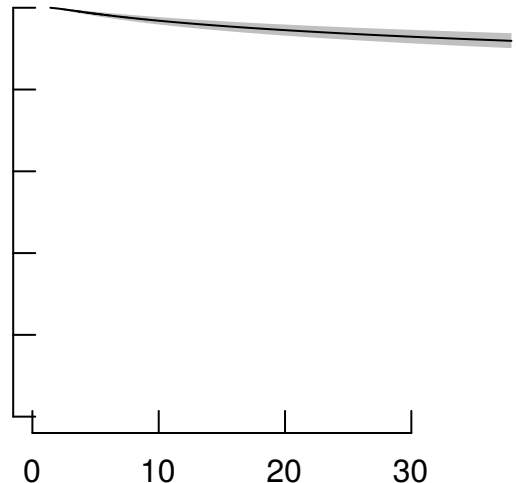

N deposition (kg N ha<sup>-1</sup>yr<sup>-1</sup>)

S deposition (kg S ha<sup>-1</sup>yr<sup>-1</sup>)

# loblolly pine

*Pinus taeda*

## N deposition

## S deposition

growth: sample size= 60374 , N & S corr.= 0.32 , VIF\_N= 1.2 , VIF\_S= 1.29

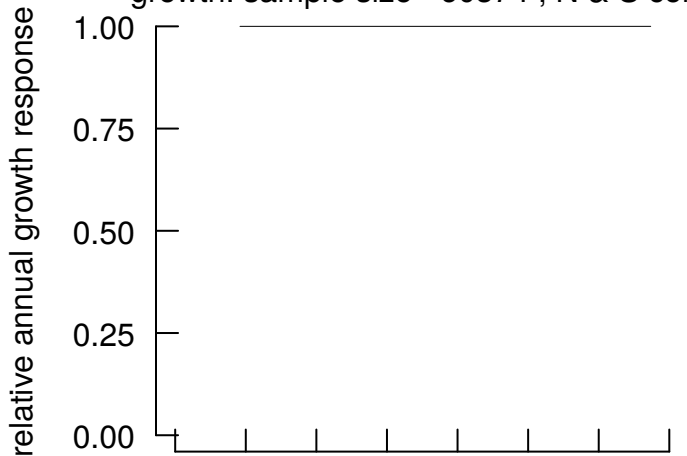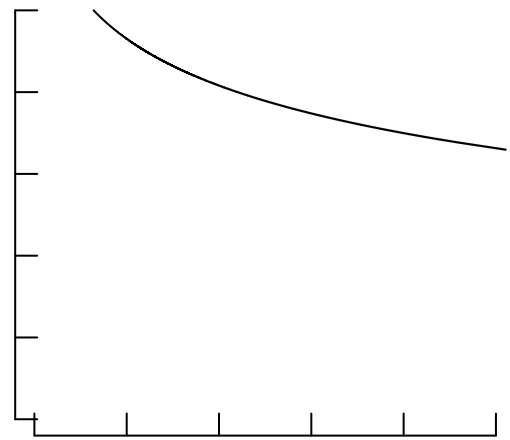

survival: sample size= 68996 , N & S corr.= 0.32 , VIF\_N= 1.2 , VIF\_S= 1.29

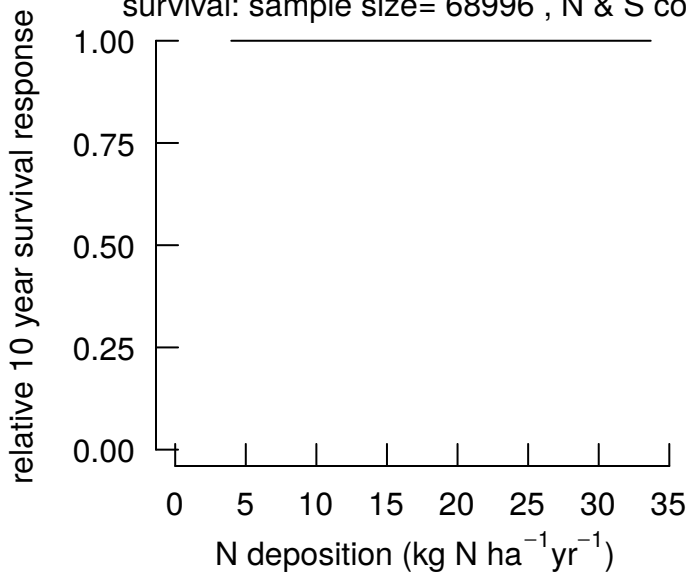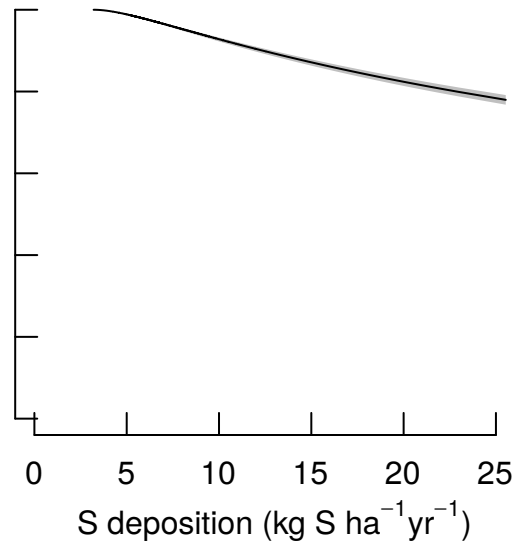

Virginia pine  
*Pinus virginiana*

**N deposition**

**S deposition**

growth: sample size= 6937 , N & S corr.= 0.44 , VIF\_N= 1.44 , VIF\_S= 1.64

relative annual growth response

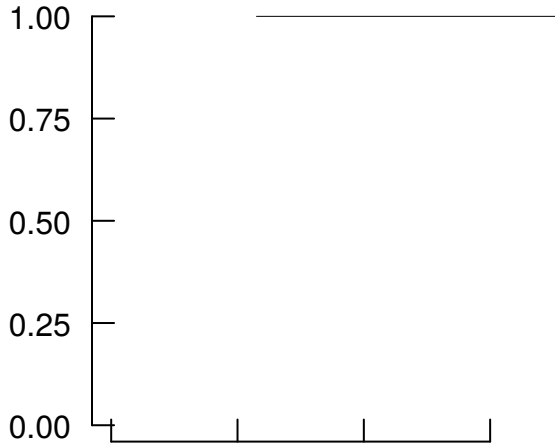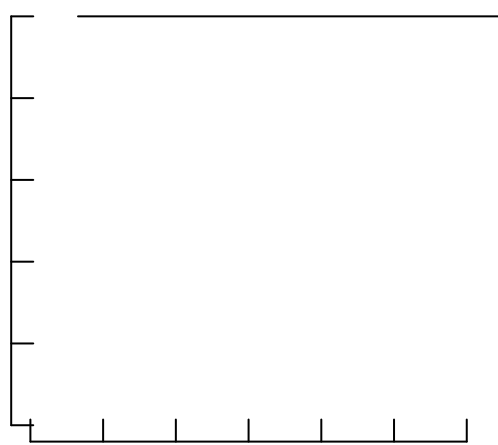

survival: sample size= 9236 , N & S corr.= 0.44 , VIF\_N= 1.44 , VIF\_S= 1.64

relative 10 year survival response

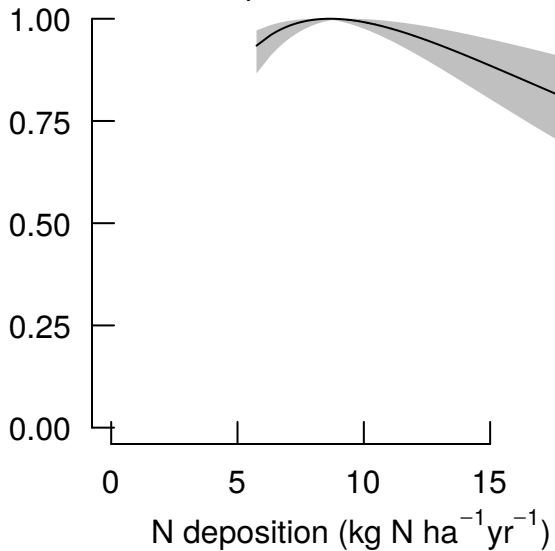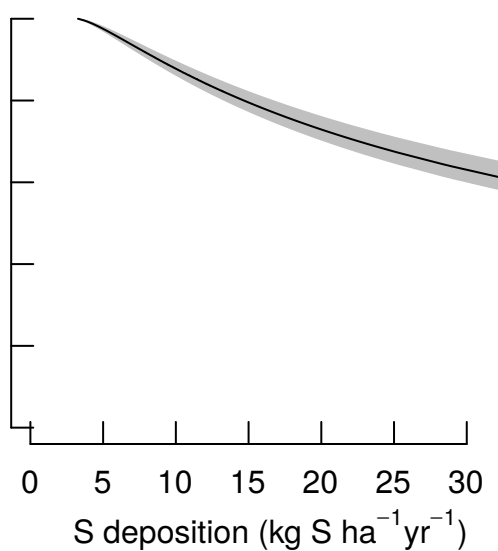

# singleleaf pinyon

*Pinus monophylla*

## N deposition

## S deposition

growth: sample size= 3579 , N & S corr.= 0.58 , VIF\_N= 1.77 , VIF\_S= 2.82

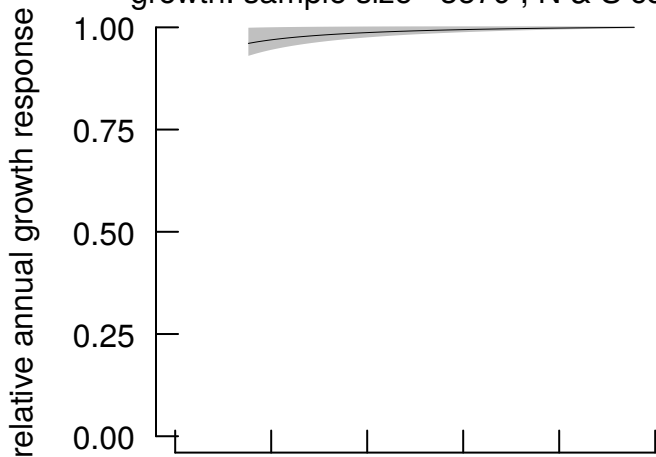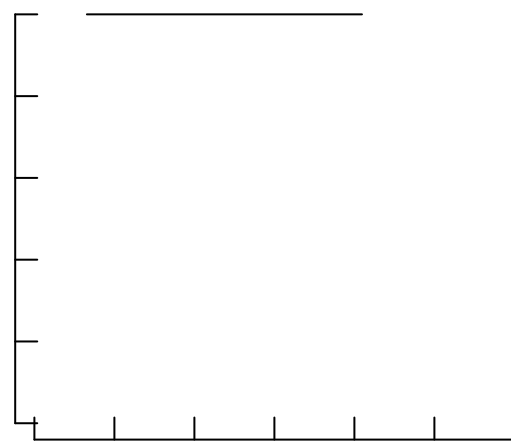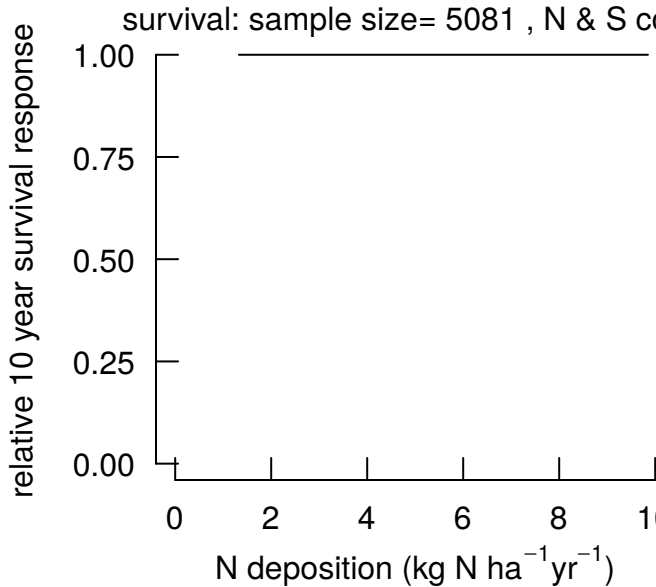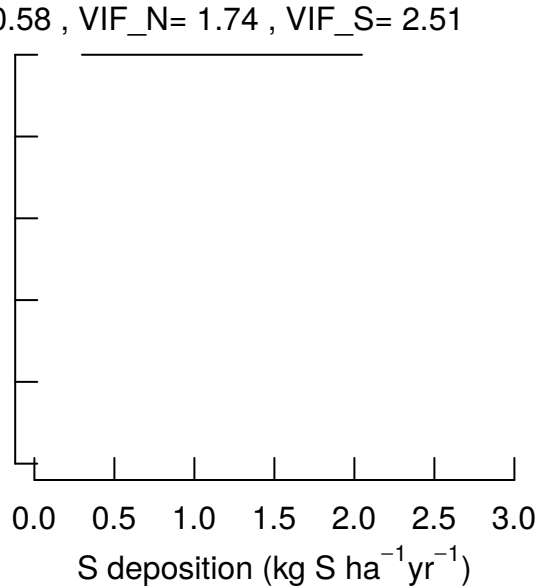

survival: sample size= 5081 , N & S corr.= 0.58 , VIF\_N= 1.74 , VIF\_S= 2.51

# Douglas-fir

*Pseudotsuga menziesii*

## N deposition

## S deposition

growth: sample size= 39373 , N & S corr.= 0.65 , VIF\_N= 1.93 , VIF\_S= 2.98

relative annual growth response

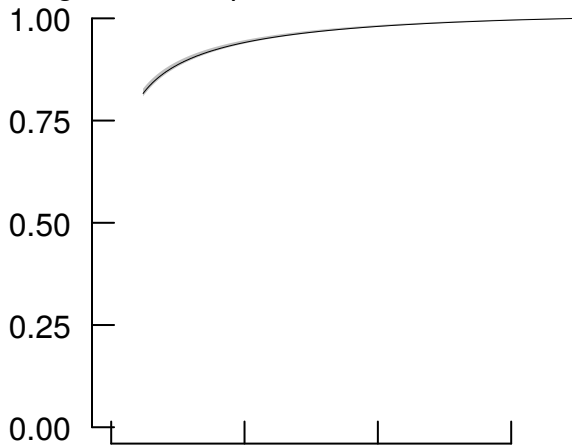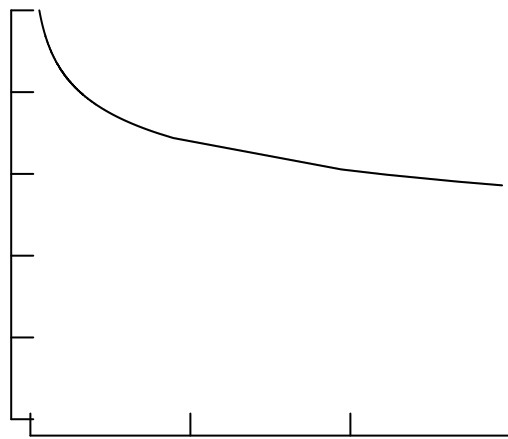

relative 10 year survival response

survival: sample size= 46496 , N & S corr.= 0.65 , VIF\_N= 1.91 , VIF\_S= 2.78

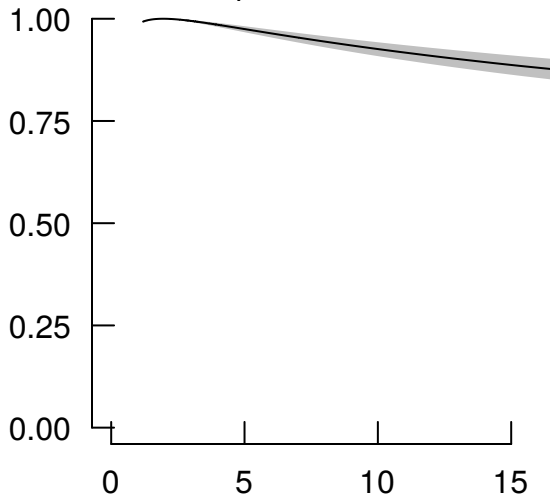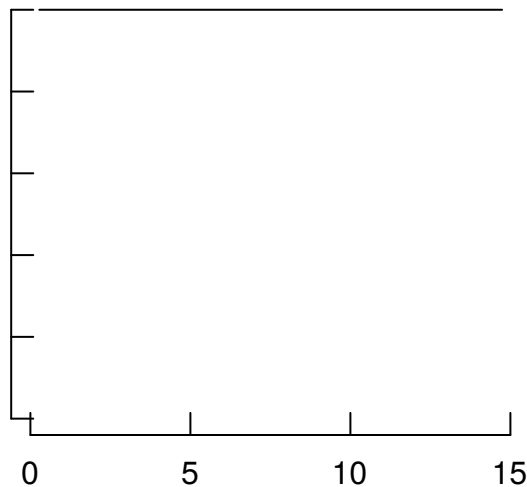

N deposition (kg N ha<sup>-1</sup> yr<sup>-1</sup>)

S deposition (kg S ha<sup>-1</sup> yr<sup>-1</sup>)

# baldcypress

*Taxodium distichum*

## N deposition

## S deposition

growth: sample size= 2892 , N & S corr.= 0.54 , VIF\_N= 1.41 , VIF\_S= 1.64

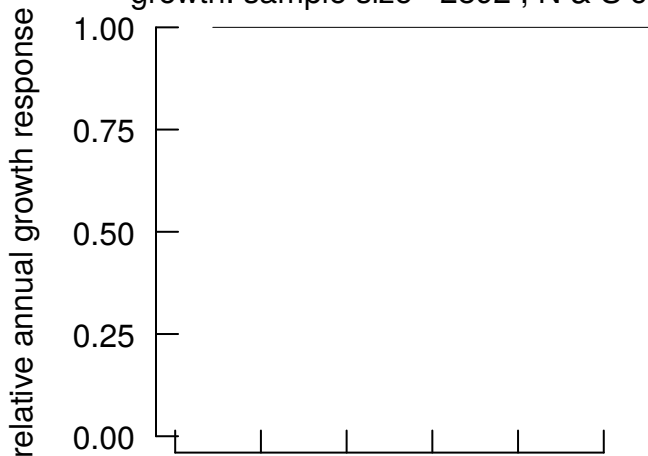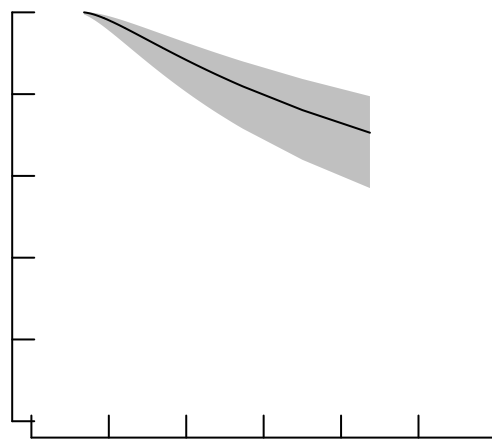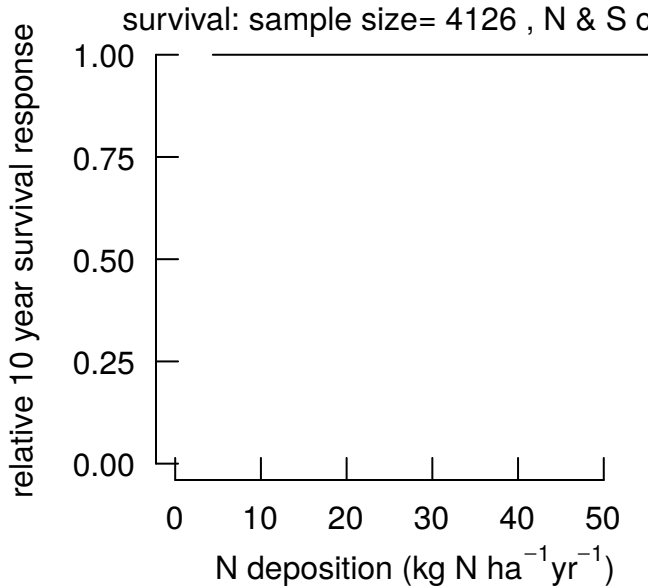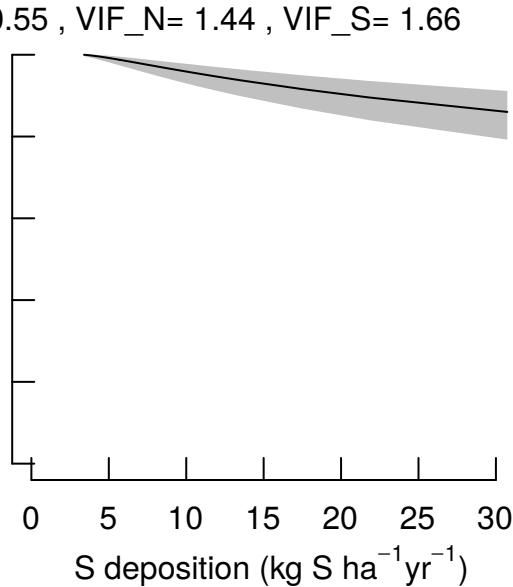

survival: sample size= 4126 , N & S corr.= 0.55 , VIF\_N= 1.44 , VIF\_S= 1.66



**pondcypress**

*Taxodium ascendens*

**N deposition**

**S deposition**

growth: sample size= 3459 , N & S corr.= 0.71 , VIF\_N= 2.06 , VIF\_S= 2.12

relative annual growth response

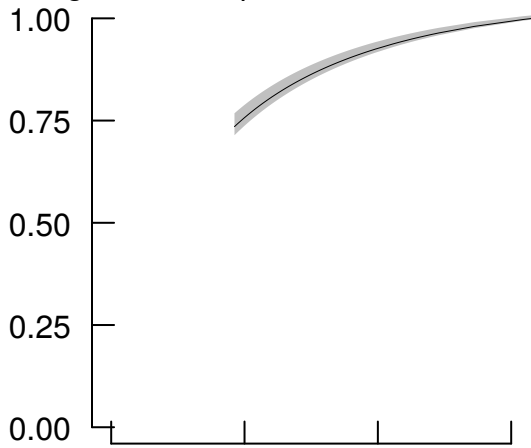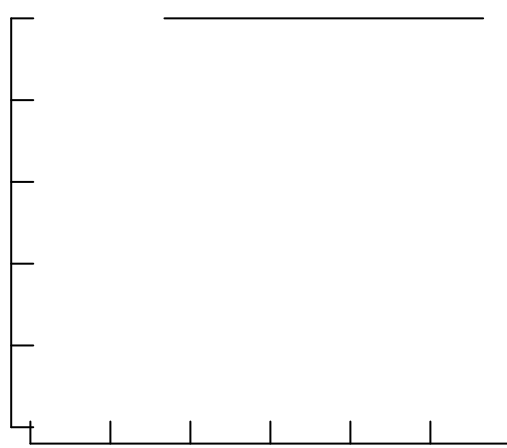

relative 10 year survival response

survival: sample size= 5064 , N & S corr.= 0.7 , VIF\_N= 2.06 , VIF\_S= 2.13

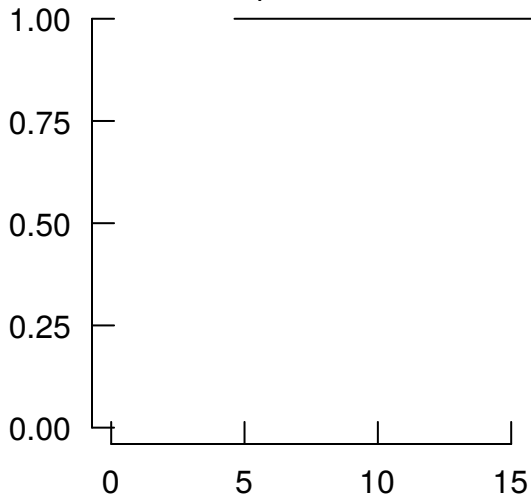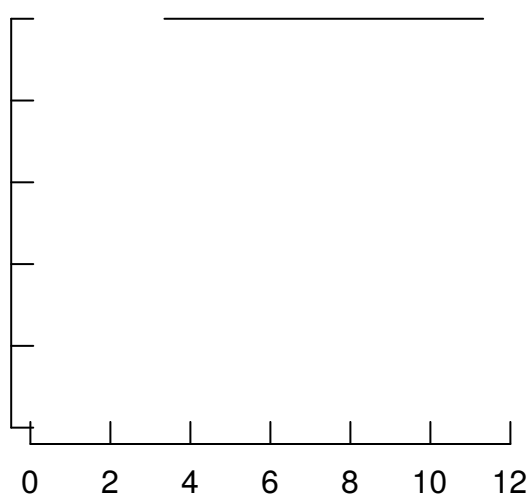

N deposition (kg N ha<sup>-1</sup> yr<sup>-1</sup>)

S deposition (kg S ha<sup>-1</sup> yr<sup>-1</sup>)

# northern white-cedar

*Thuja occidentalis*

## N deposition

## S deposition

growth: sample size= 33299 , N & S corr.= 0.61 , VIF\_N= 3 , VIF\_S= 3.43

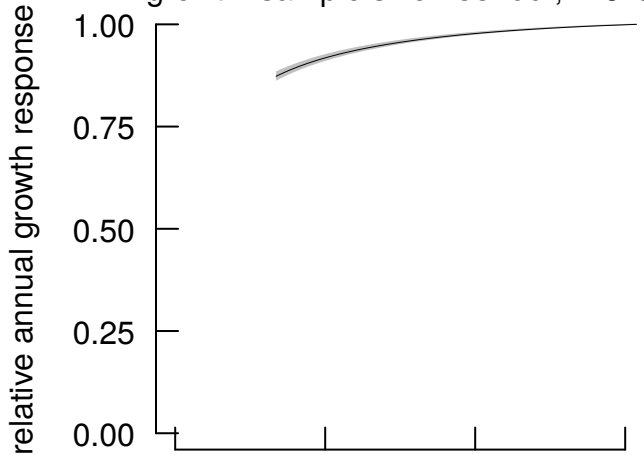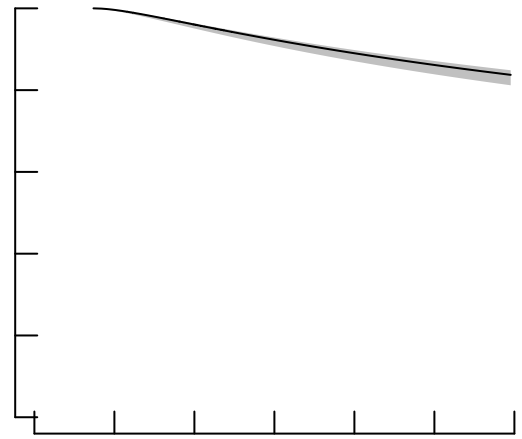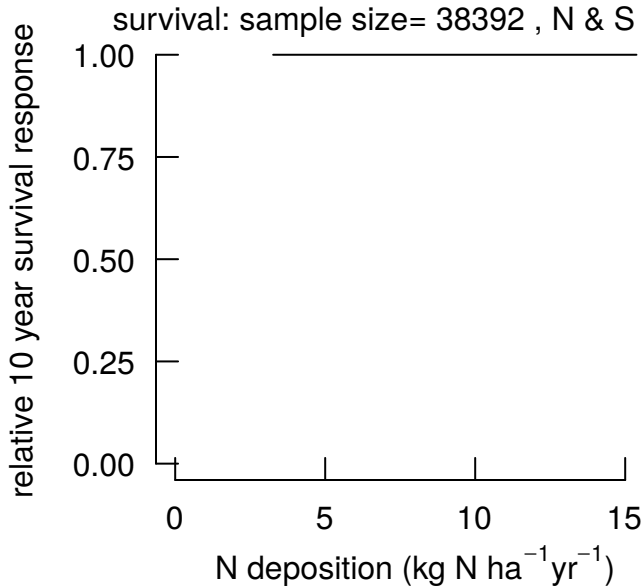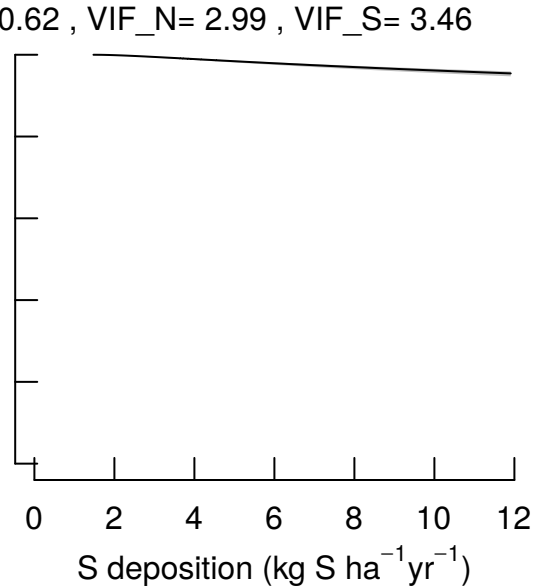

survival: sample size= 38392 , N & S corr.= 0.62 , VIF\_N= 2.99 , VIF\_S= 3.46

**western redcedar**

*Thuja plicata*

**N deposition**

**S deposition**

growth: sample size= 3442 , N & S corr.= 0.41 , VIF\_N= 1.24 , VIF\_S= 3.84

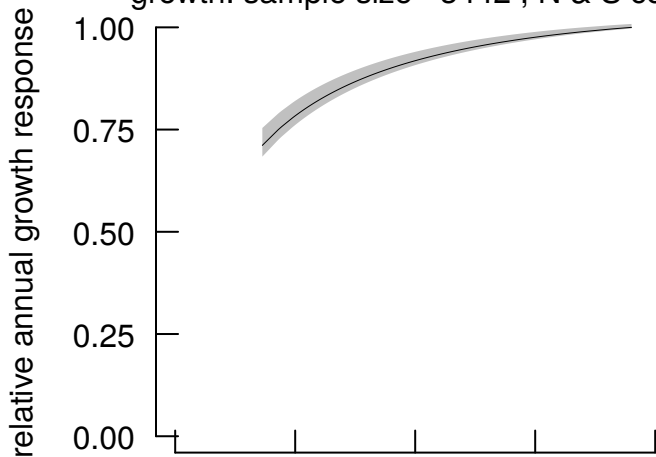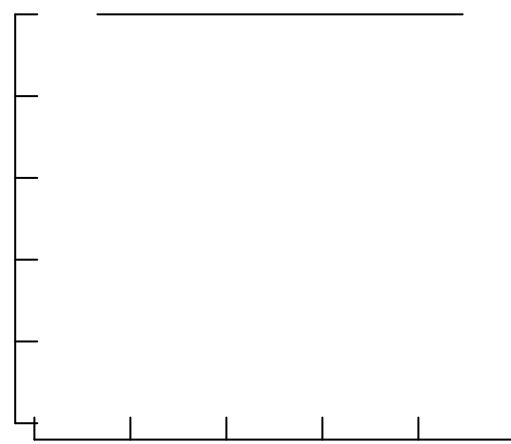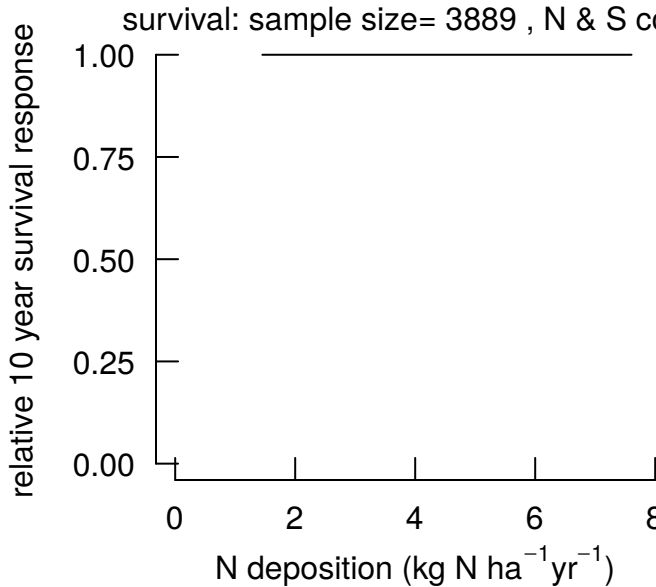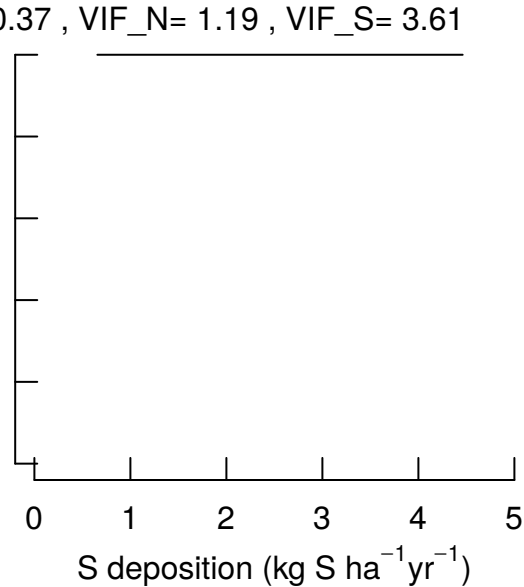

**eastern hemlock**

*Tsuga canadensis*

**N deposition**

**S deposition**

growth: sample size= 22864 , N & S corr.= 0.78 , VIF\_N= 2.86 , VIF\_S= 2.63

relative annual growth response

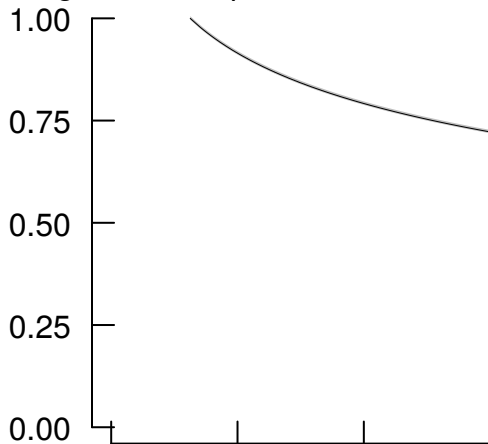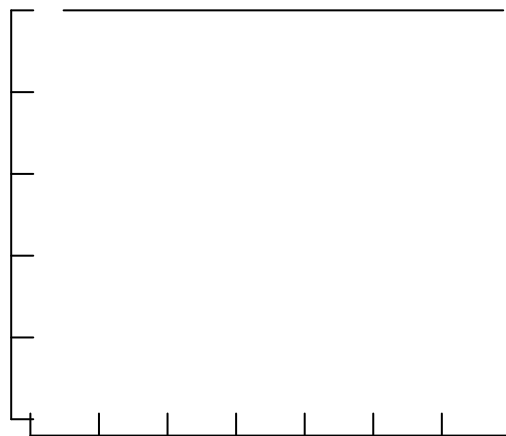

relative 10 year survival response

survival: sample size= 25485 , N & S corr.= 0.78 , VIF\_N= 2.83 , VIF\_S= 2.6

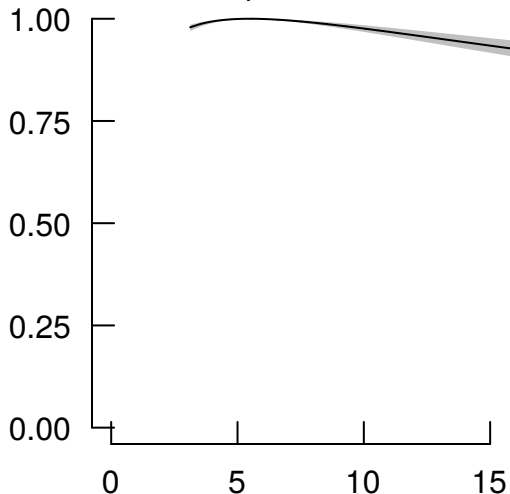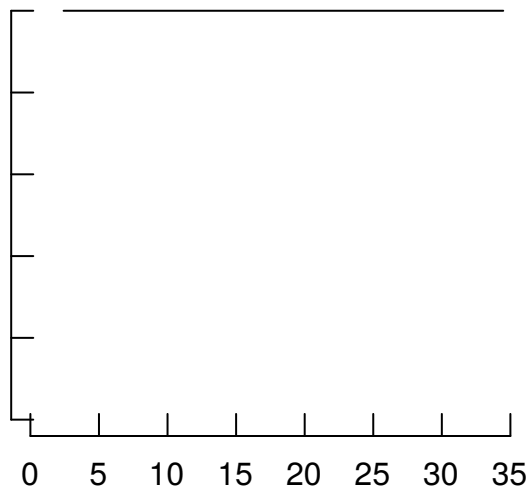

N deposition (kg N ha<sup>-1</sup> yr<sup>-1</sup>)

S deposition (kg S ha<sup>-1</sup> yr<sup>-1</sup>)

**western hemlock**

*Tsuga heterophylla*

**N deposition**

**S deposition**

growth: sample size= 9415 , N & S corr.= 0.34 , VIF\_N= 1.16 , VIF\_S= 2.9

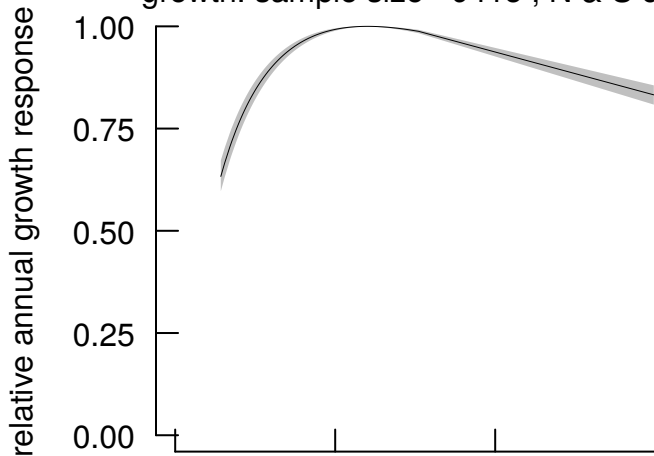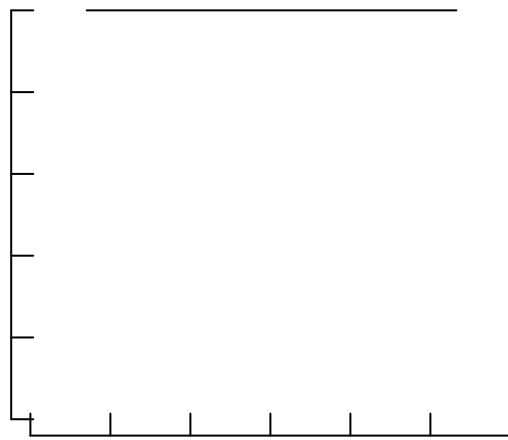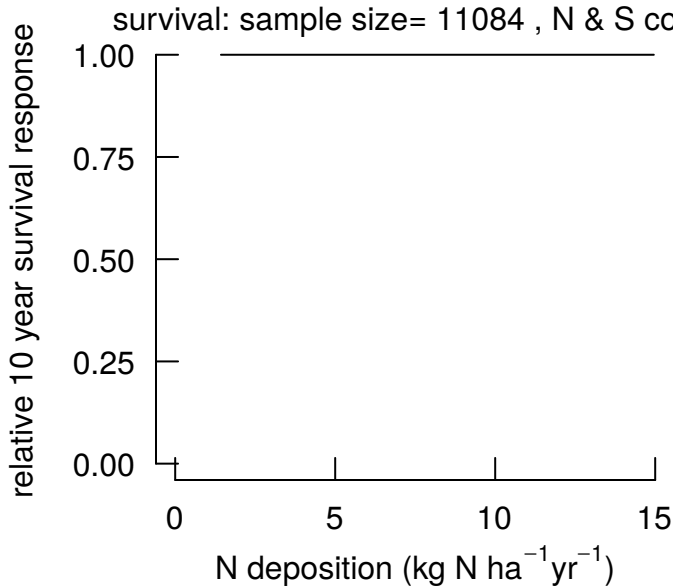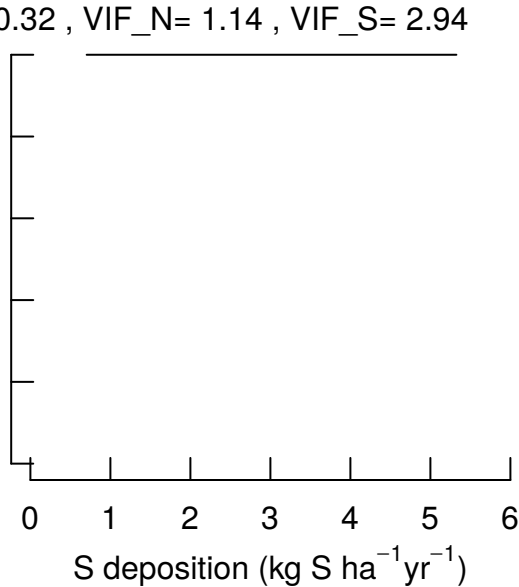

survival: sample size= 11084 , N & S corr.= 0.32 , VIF\_N= 1.14 , VIF\_S= 2.94

# mountain hemlock

*Tsuga mertensiana*

## N deposition

## S deposition

growth: sample size= 3913 , N & S corr.= 0.58 , VIF\_N= 2.57 , VIF\_S= 7.01

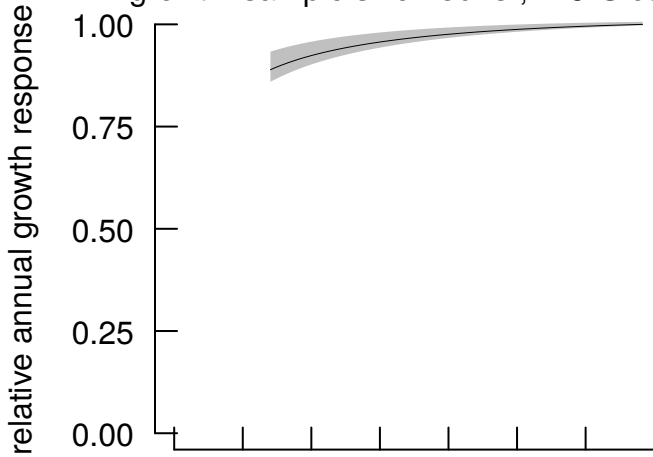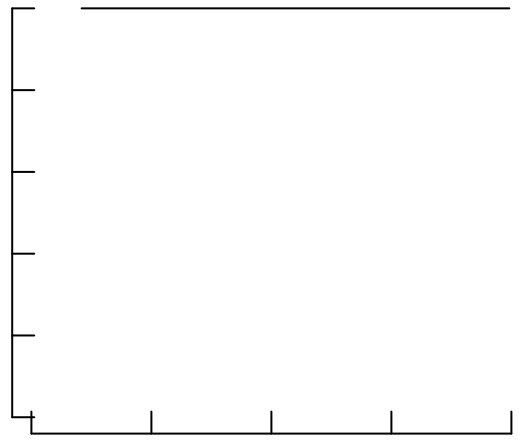

survival: sample size= 4663 , N & S corr.= 0.59 , VIF\_N= 2.53 , VIF\_S= 7.04

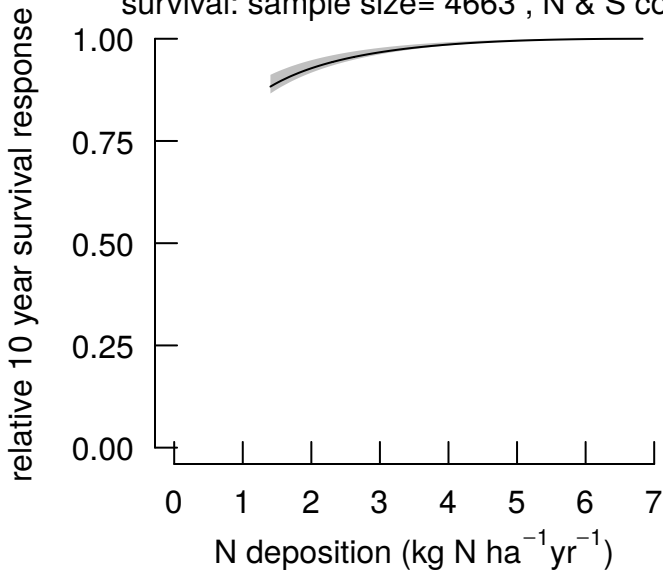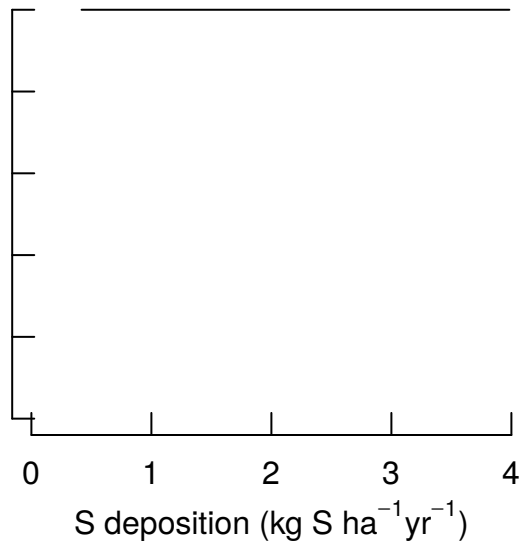

**boxelder**  
*Acer negundo*

**N deposition**

**S deposition**

growth: sample size= 6070 , N & S corr.= 0.14 , VIF\_N= 1.1 , VIF\_S= 1.44

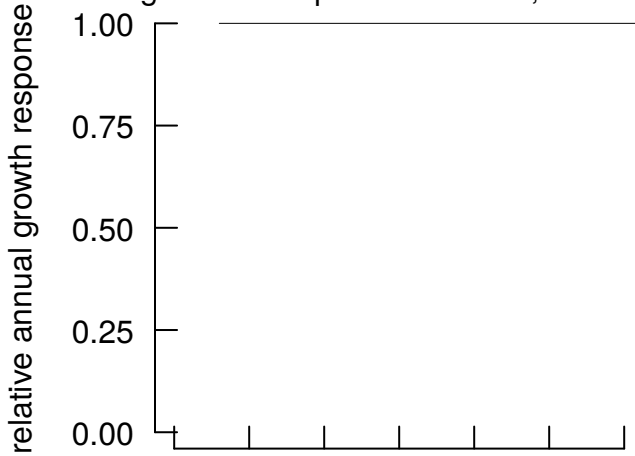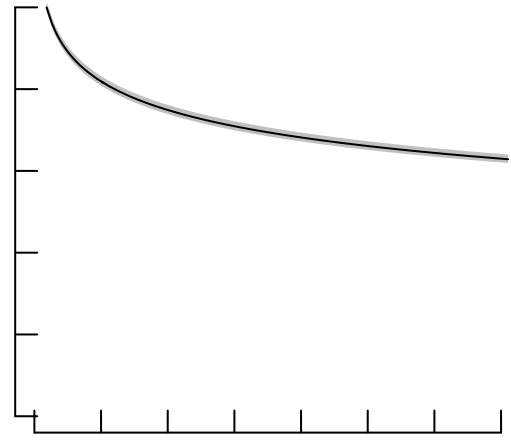

survival: sample size= 7410 , N & S corr.= 0.13 , VIF\_N= 1.1 , VIF\_S= 1.4

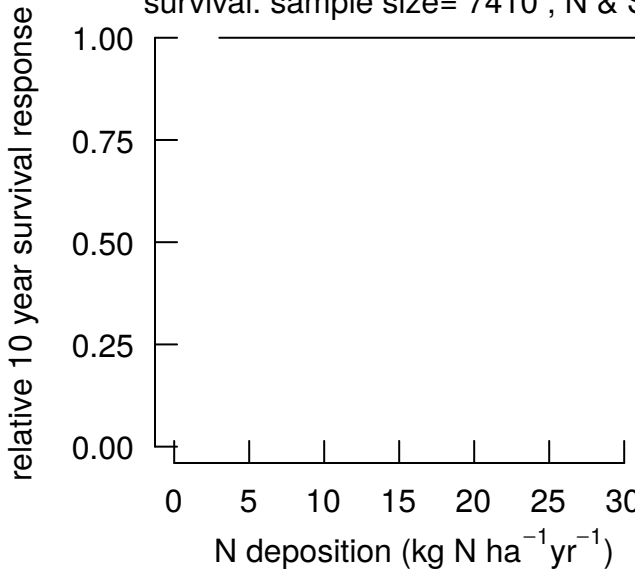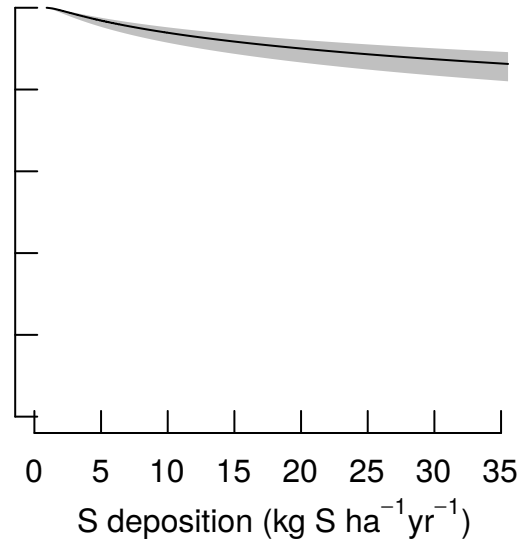

**red maple**  
*Acer rubrum*

**N deposition**

**S deposition**

growth: sample size= 101435 , N & S corr.= 0.6 , VIF\_N= 1.78 , VIF\_S= 1.71

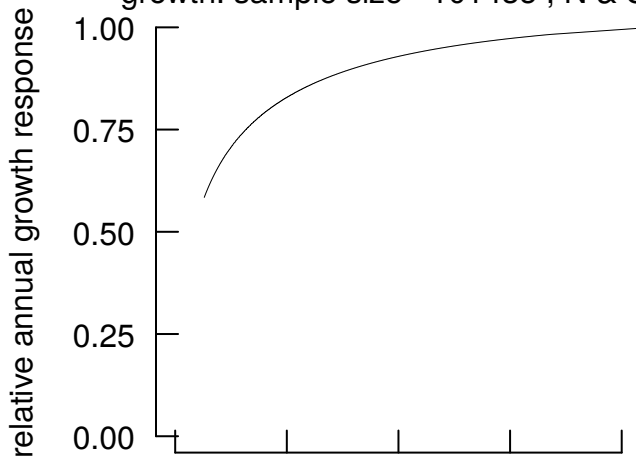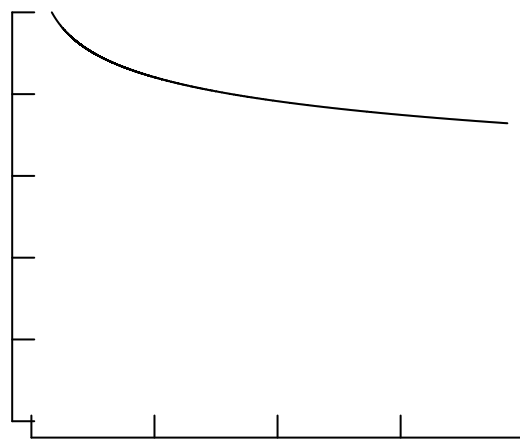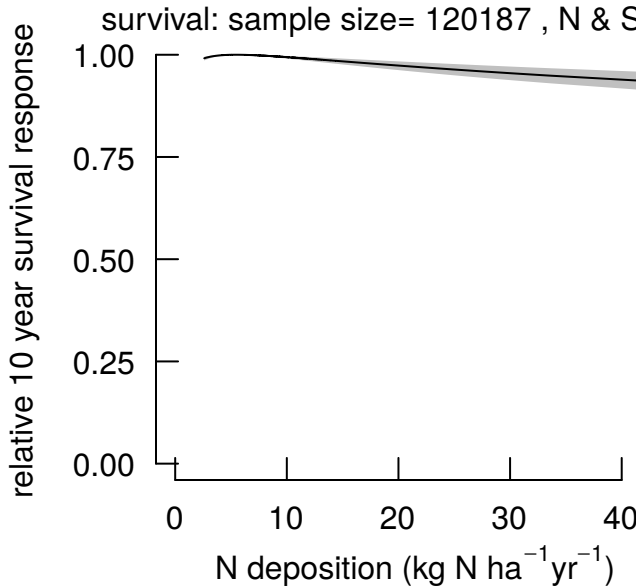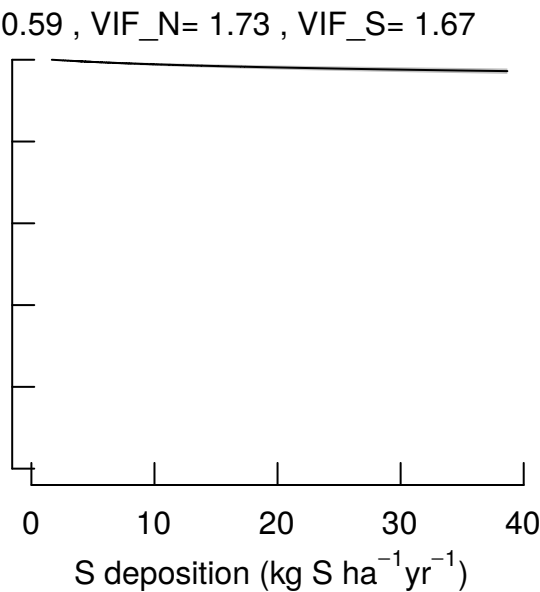



**silver maple**  
*Acer saccharinum*

**N deposition**

**S deposition**

growth: sample size= 4561 , N & S corr.= 0.27 , VIF\_N= 1.13 , VIF\_S= 1.41

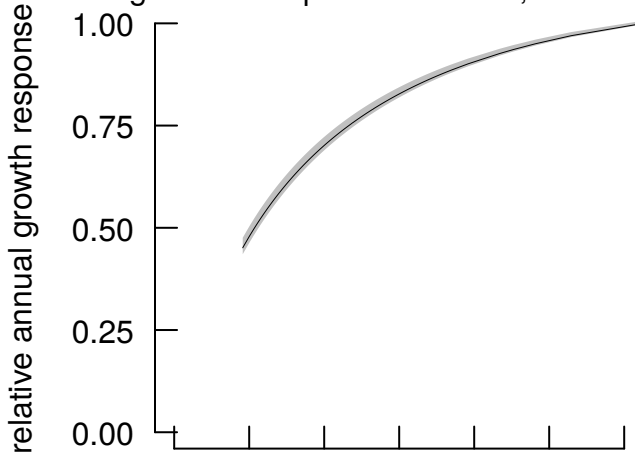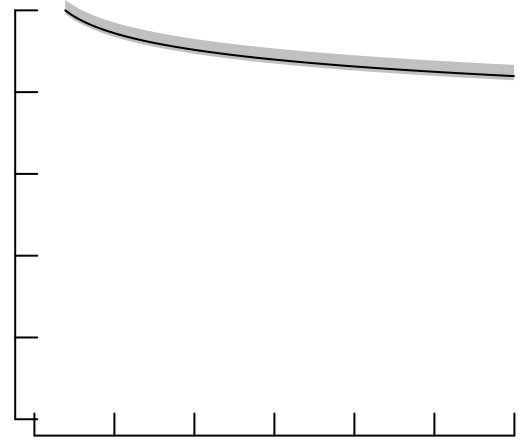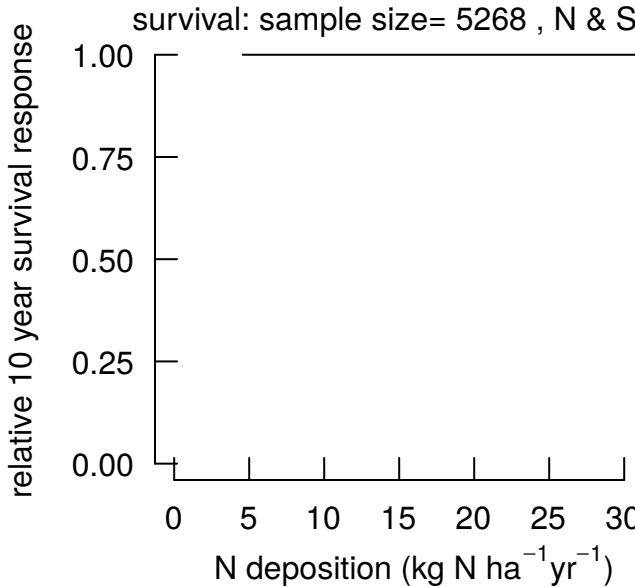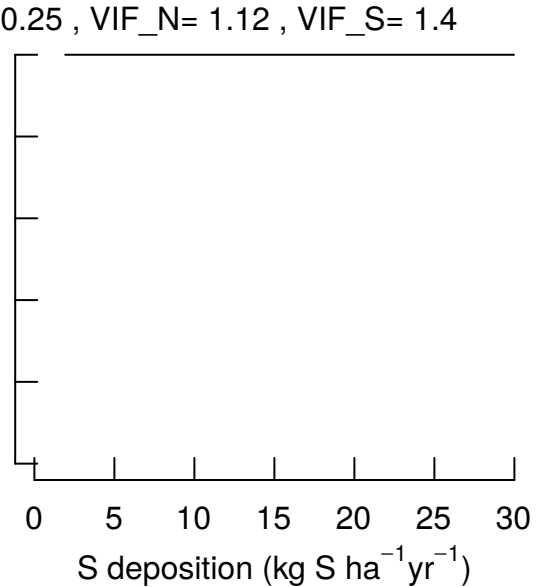

survival: sample size= 5268 , N & S corr.= 0.25 , VIF\_N= 1.12 , VIF\_S= 1.4

**sugar maple**  
*Acer saccharum*

**N deposition**

**S deposition**

growth: sample size= 64875 , N & S corr.= 0.67 , VIF\_N= 2.39 , VIF\_S= 2.26

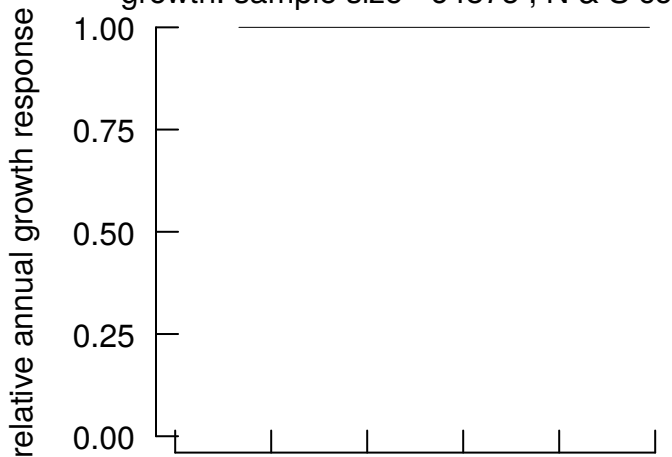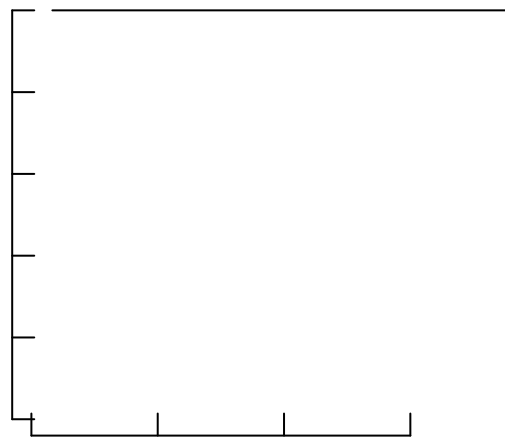

survival: sample size= 74067 , N & S corr.= 0.67 , VIF\_N= 2.39 , VIF\_S= 2.24

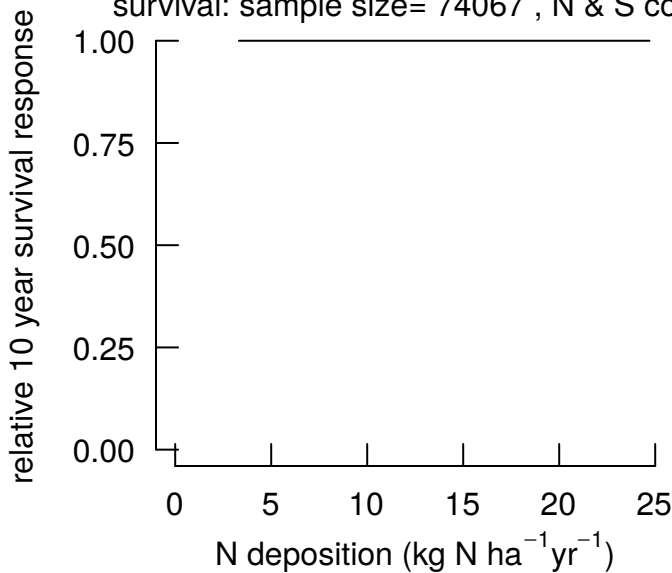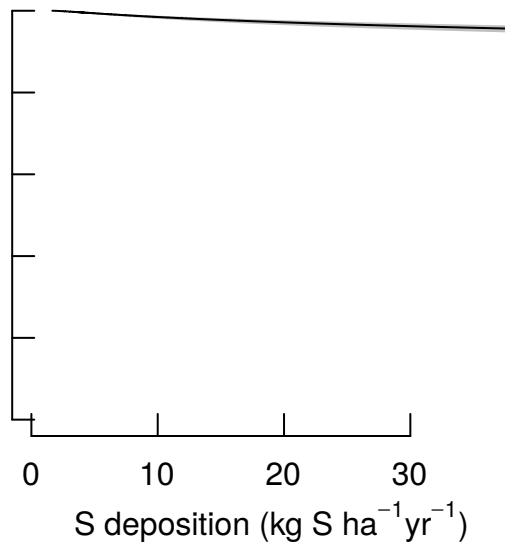

**yellow birch**  
*Betula alleghaniensis*

**N deposition**

**S deposition**

growth: sample size= 13733 , N & S corr.= 0.7 , VIF\_N= 2.35 , VIF\_S= 2.45

relative annual growth response

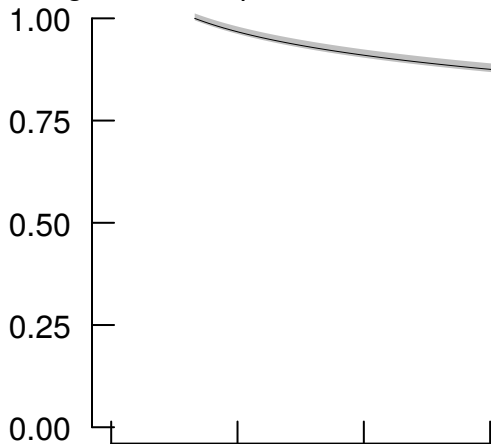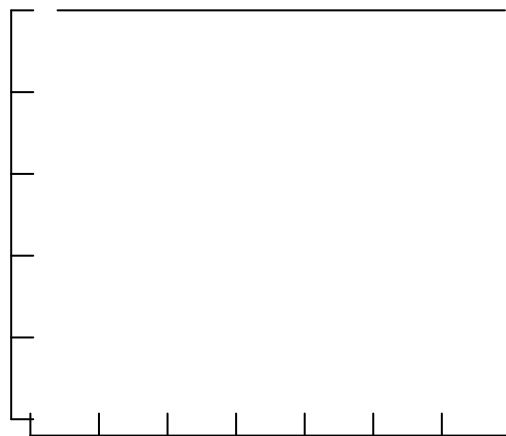

relative 10 year survival response

survival: sample size= 16019 , N & S corr.= 0.71 , VIF\_N= 2.37 , VIF\_S= 2.47

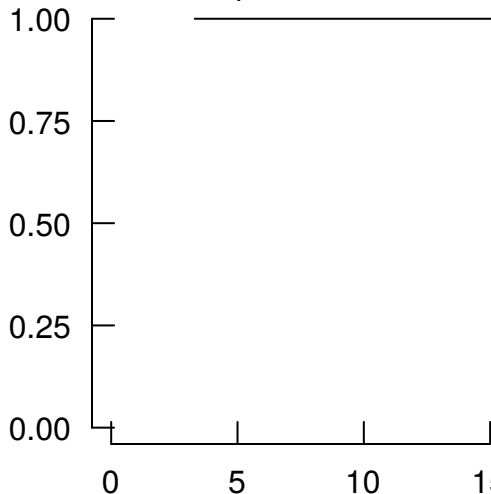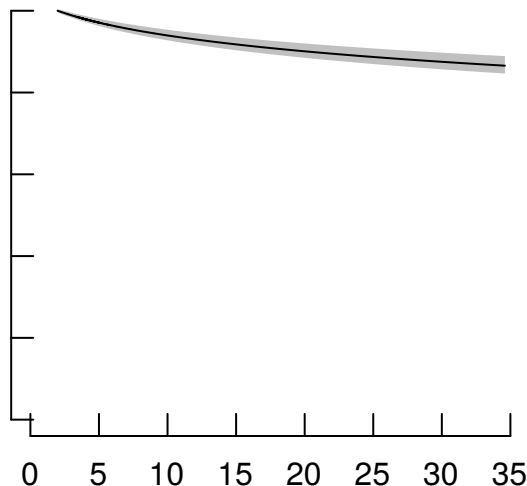

N deposition (kg N ha<sup>-1</sup> yr<sup>-1</sup>)

S deposition (kg S ha<sup>-1</sup> yr<sup>-1</sup>)

**sweet birch**

*Betula lenta*

**N deposition**

**S deposition**

growth: sample size= 8905 , N & S corr.= 0.58 , VIF\_N= 1.61 , VIF\_S= 2.01

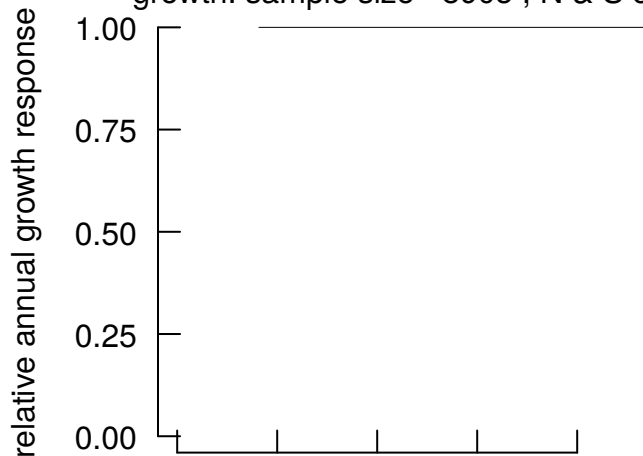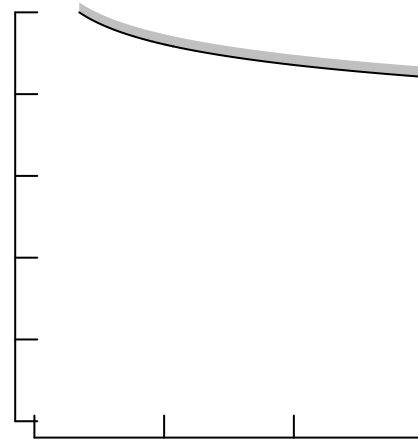

survival: sample size= 10157 , N & S corr.= 0.57 , VIF\_N= 1.59 , VIF\_S= 1.99

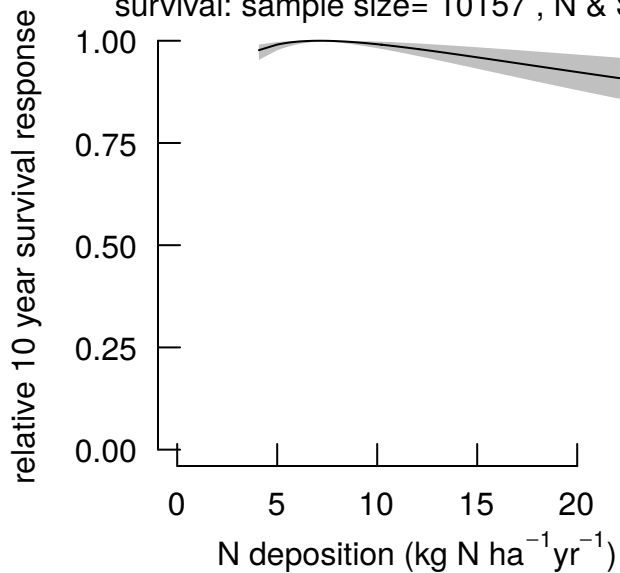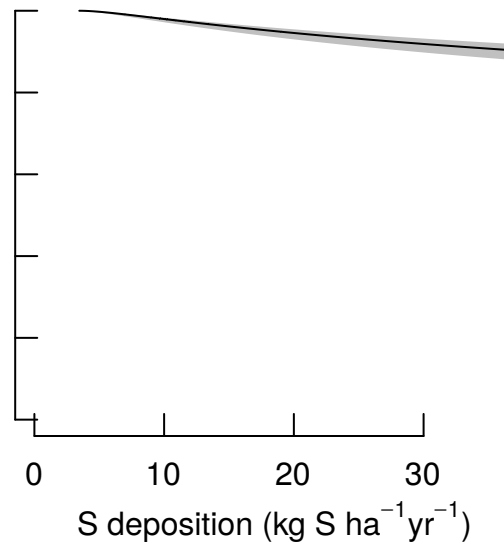

**paper birch**  
*Betula papyrifera*

**N deposition**

**S deposition**

growth: sample size= 18476 , N & S corr.= 0.42 , VIF\_N= 1.75 , VIF\_S= 1.99

relative annual growth response

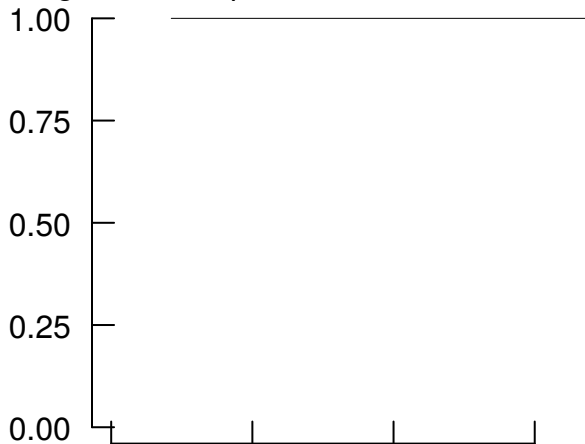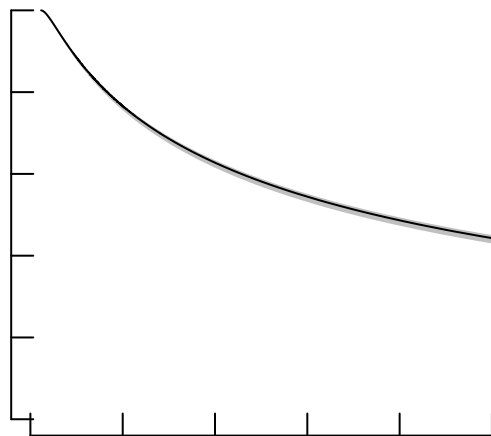

relative 10 year survival response

survival: sample size= 24432 , N & S corr.= 0.42 , VIF\_N= 1.71 , VIF\_S= 2.02

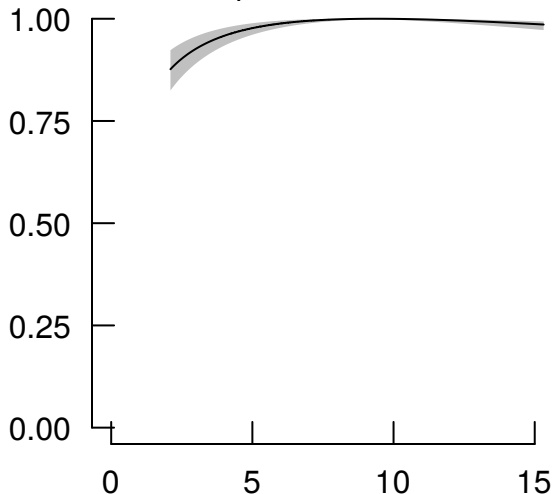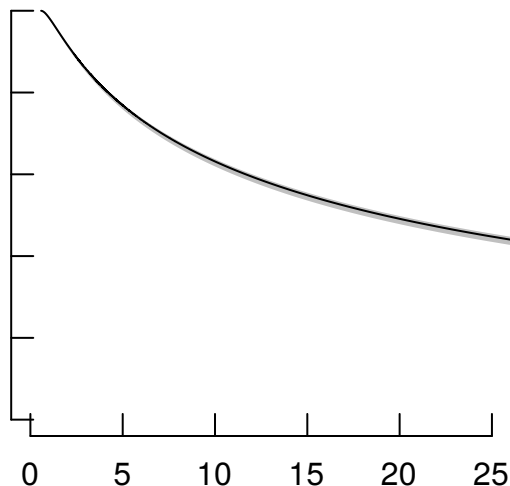

N deposition (kg N ha<sup>-1</sup> yr<sup>-1</sup>)

S deposition (kg S ha<sup>-1</sup> yr<sup>-1</sup>)

# American hornbeam, musclewood

*Carpinus caroliniana*

## N deposition

## S deposition

growth: sample size= 2137 , N & S corr.= 0.23 , VIF\_N= 1.05 , VIF\_S= 1.84

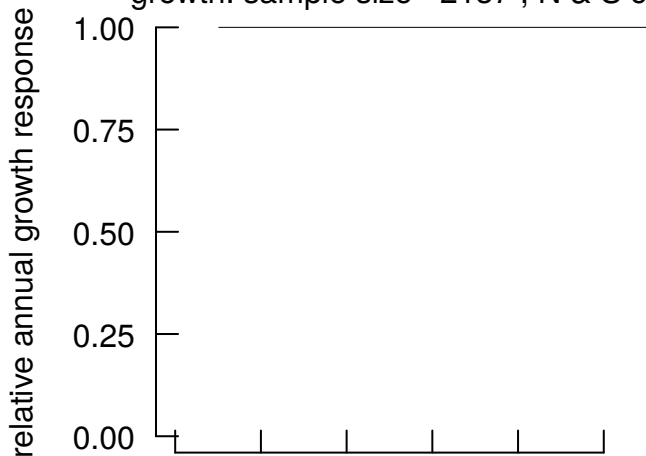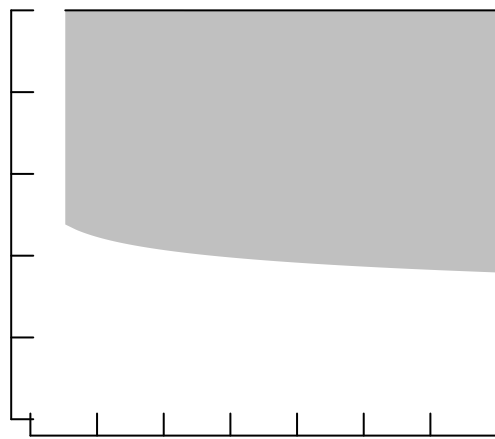

survival: sample size= 3189 , N & S corr.= 0.26 , VIF\_N= 1.07 , VIF\_S= 1.77

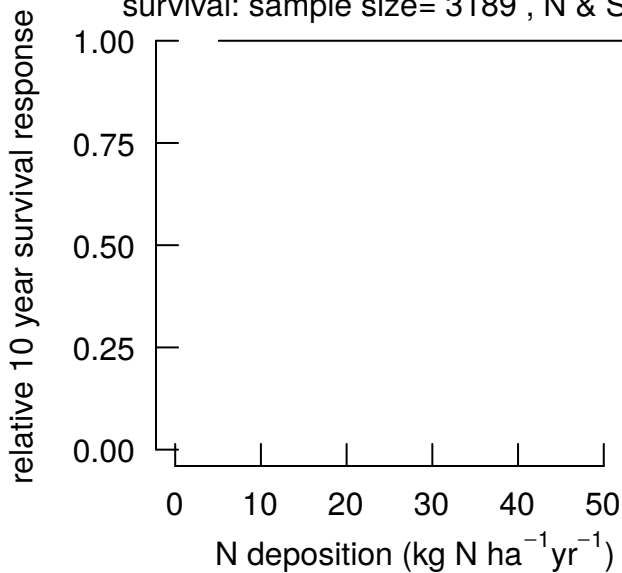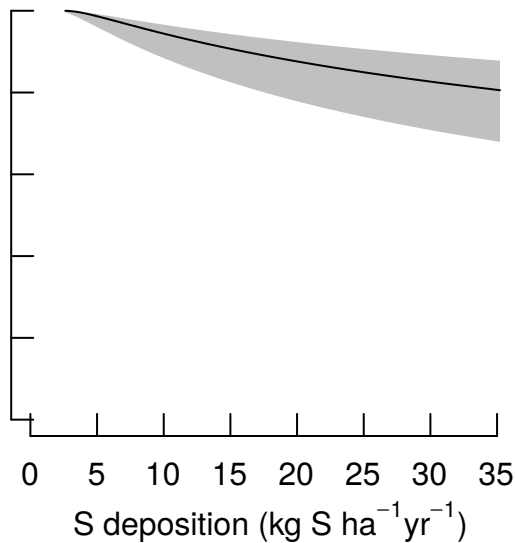

# bitternut hickory

*Carya cordiformis*

## N deposition

## S deposition

growth: sample size= 4987 , N & S corr.= 0.061 , VIF\_N= 1.11 , VIF\_S= 1.17

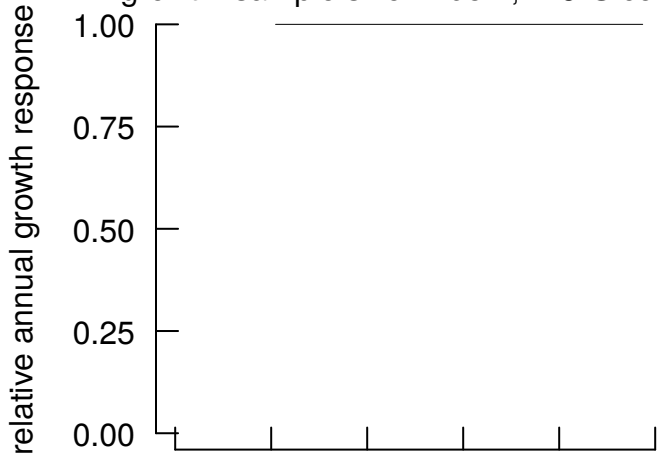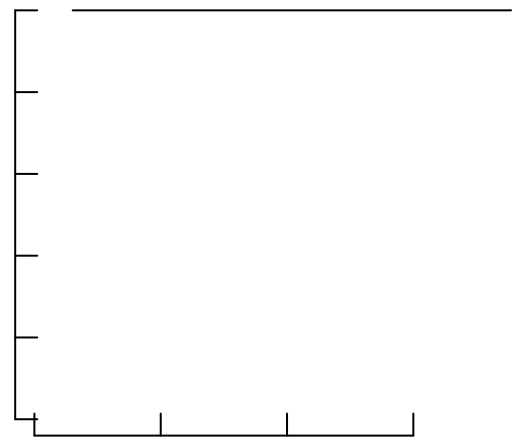

survival: sample size= 5618 , N & S corr.= 0.082 , VIF\_N= 1.1 , VIF\_S= 1.18

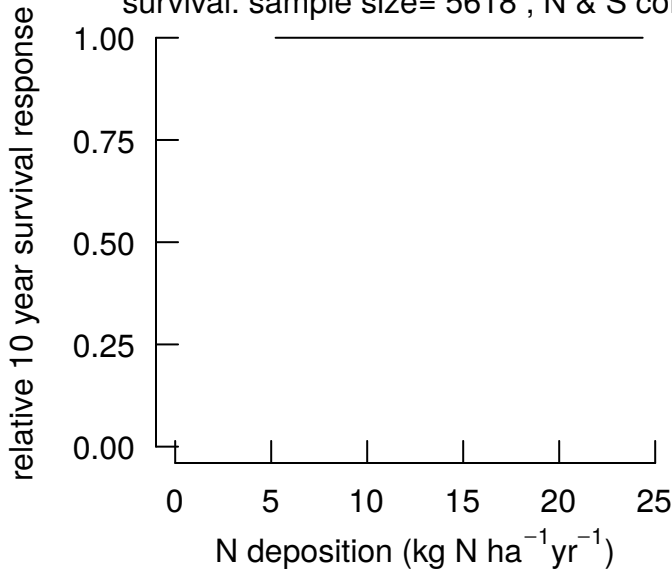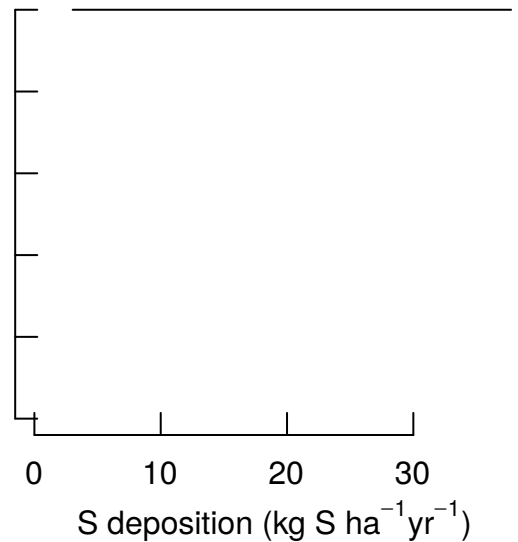

# pignut hickory

*Carya glabra*

## N deposition

## S deposition

growth: sample size= 10364 , N & S corr.= 0.4 , VIF\_N= 1.19 , VIF\_S= 1.53

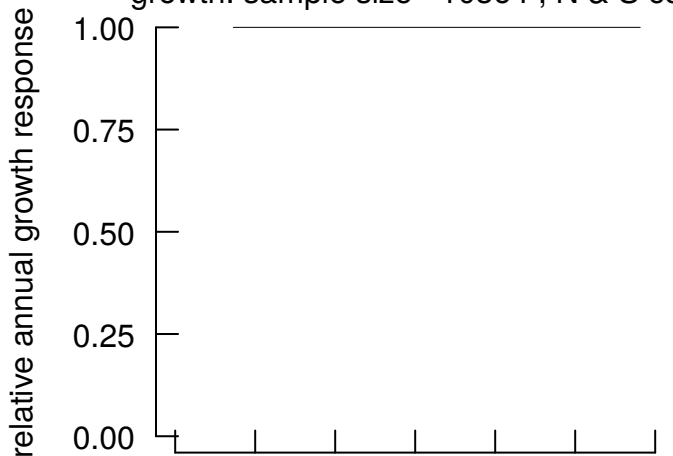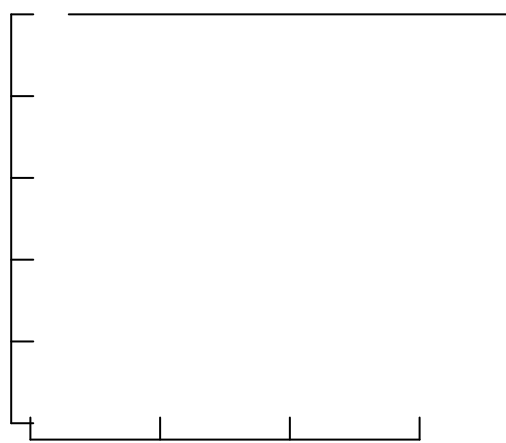

survival: sample size= 12081 , N & S corr.= 0.4 , VIF\_N= 1.19 , VIF\_S= 1.53

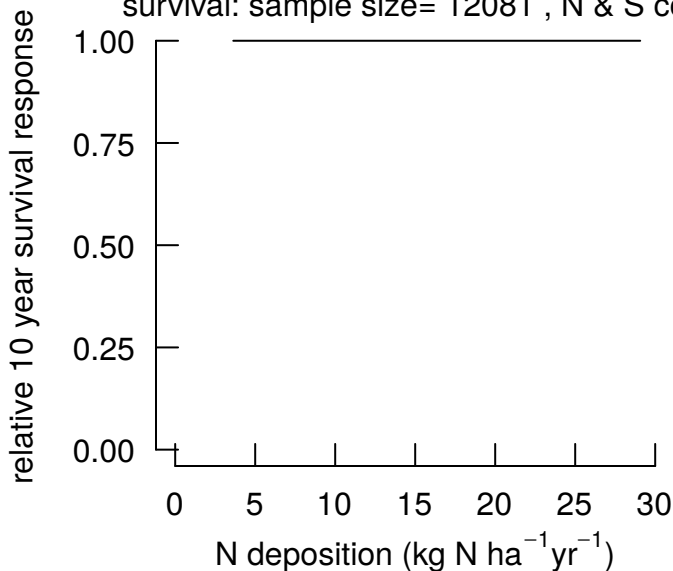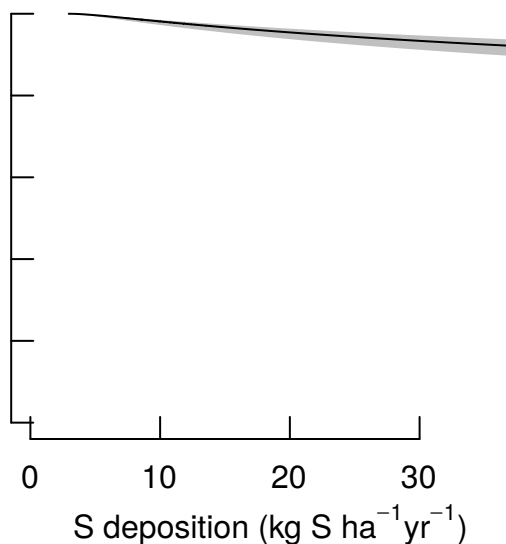



# shagbark hickory

*Carya ovata*

## N deposition

## S deposition

growth: sample size= 8684 , N & S corr.= 0.071 , VIF\_N= 1.18 , VIF\_S= 1.14

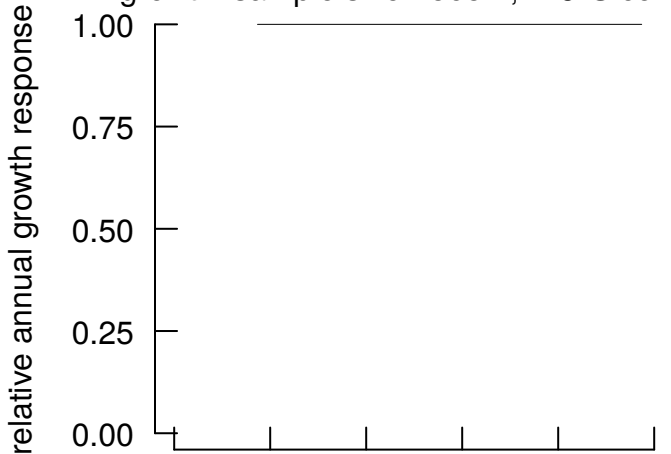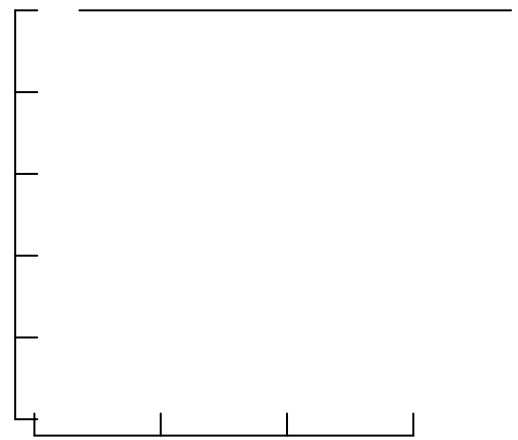

survival: sample size= 9781 , N & S corr.= 0.082 , VIF\_N= 1.18 , VIF\_S= 1.14

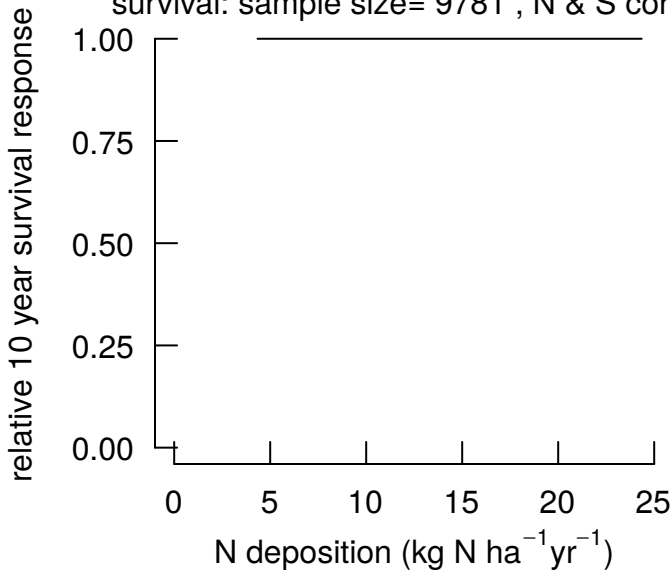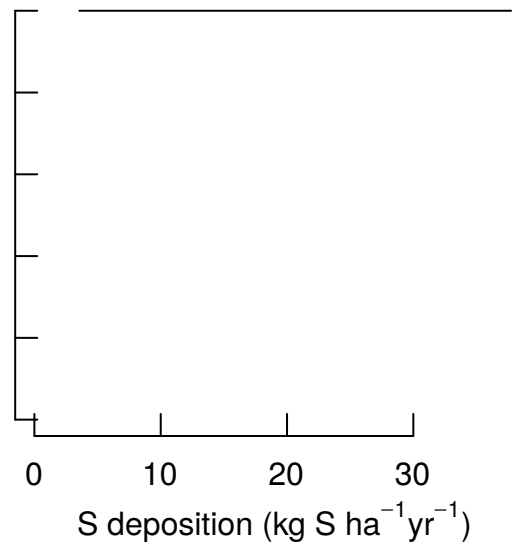

**black hickory**

*Carya texana*

**N deposition**

**S deposition**

growth: sample size= 3997 , N & S corr.= 0.17 , VIF\_N= 1.08 , VIF\_S= 1.15

relative annual growth response

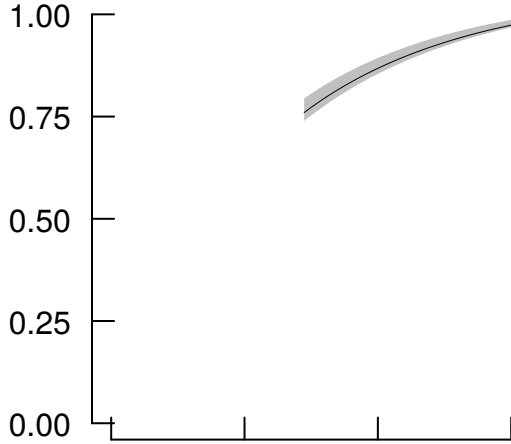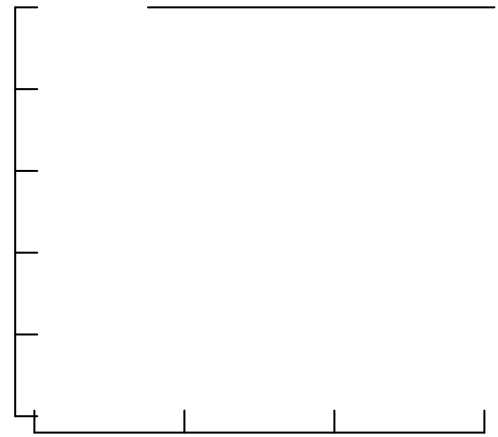

relative 10 year survival response

survival: sample size= 4868 , N & S corr.= 0.19 , VIF\_N= 1.1 , VIF\_S= 1.15

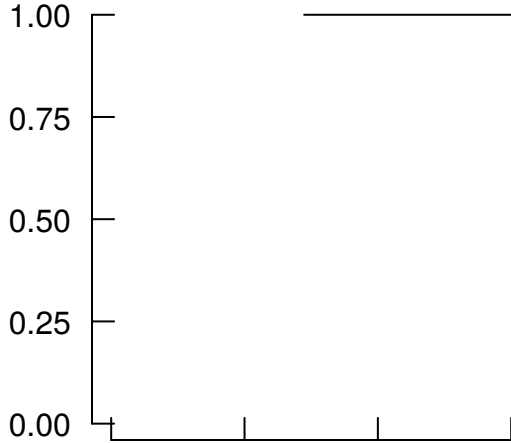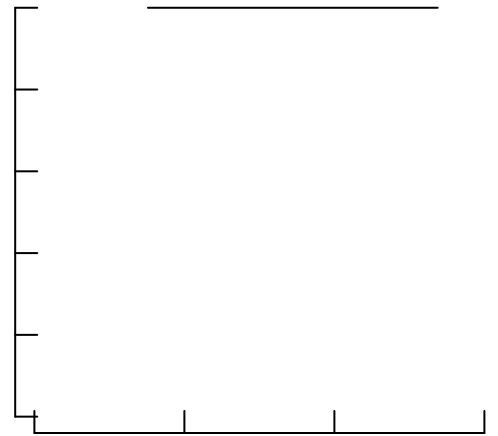

N deposition (kg N ha<sup>-1</sup> yr<sup>-1</sup>)

S deposition (kg S ha<sup>-1</sup> yr<sup>-1</sup>)

# mockernut hickory

*Carya alba*

## N deposition

## S deposition

growth: sample size= 9543 , N & S corr.= 0.14 , VIF\_N= 1.03 , VIF\_S= 1.36

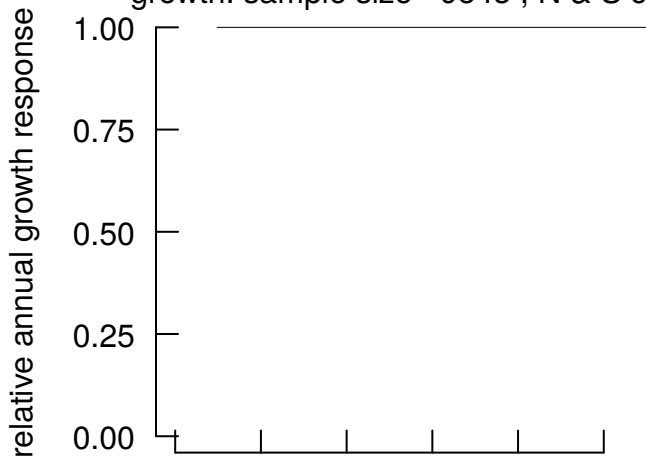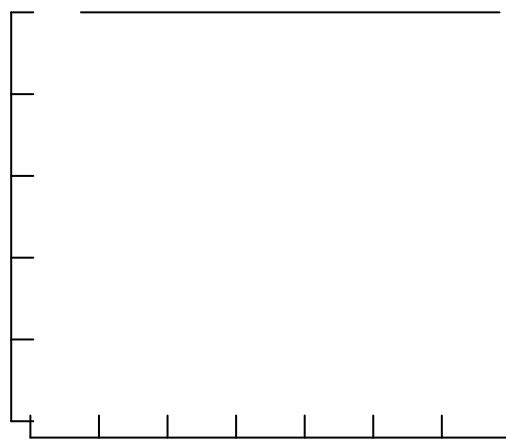

survival: sample size= 11273 , N & S corr.= 0.15 , VIF\_N= 1.03 , VIF\_S= 1.37

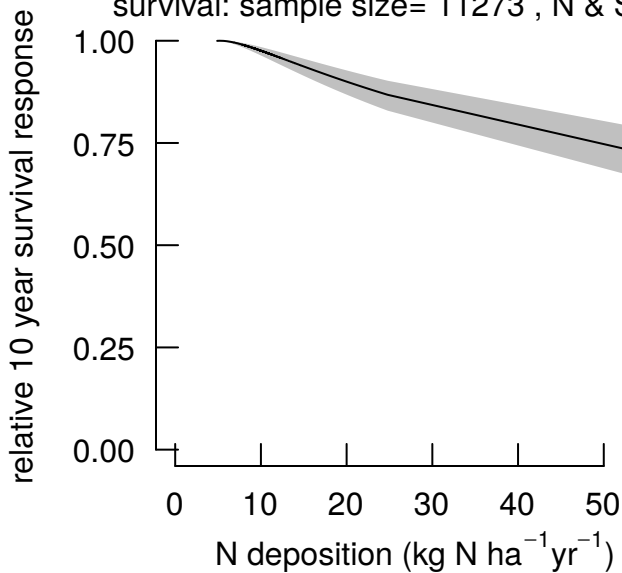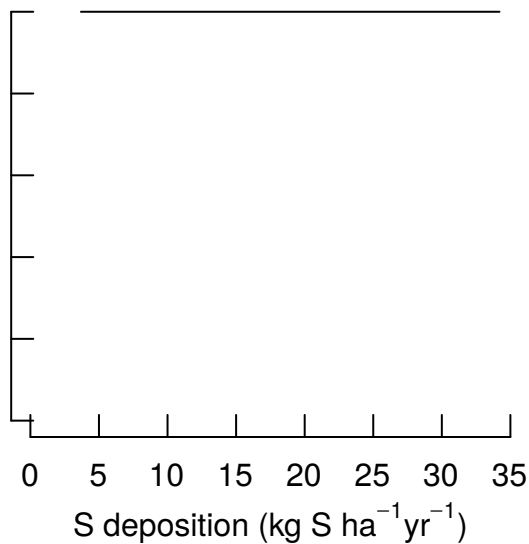

**sugarberry**  
*Celtis laevigata*

**N deposition**

**S deposition**

growth: sample size= 2862 , N & S corr.= 0.38 , VIF\_N= 1.16 , VIF\_S= 1.24

relative annual growth response

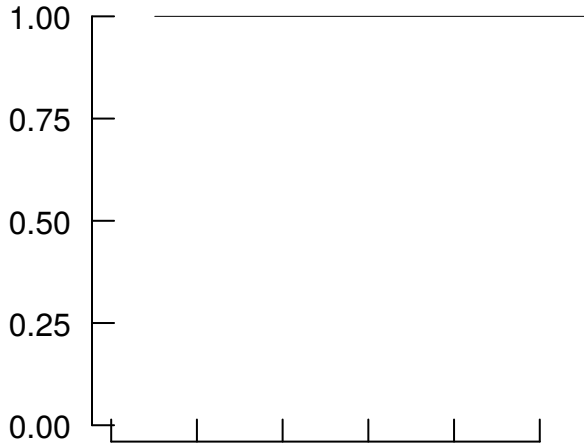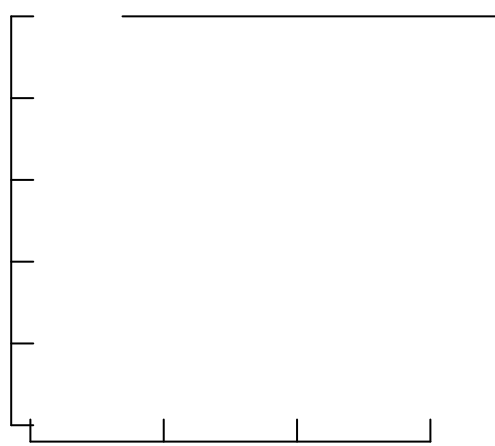

relative 10 year survival response

survival: sample size= 3602 , N & S corr.= 0.37 , VIF\_N= 1.15 , VIF\_S= 1.25

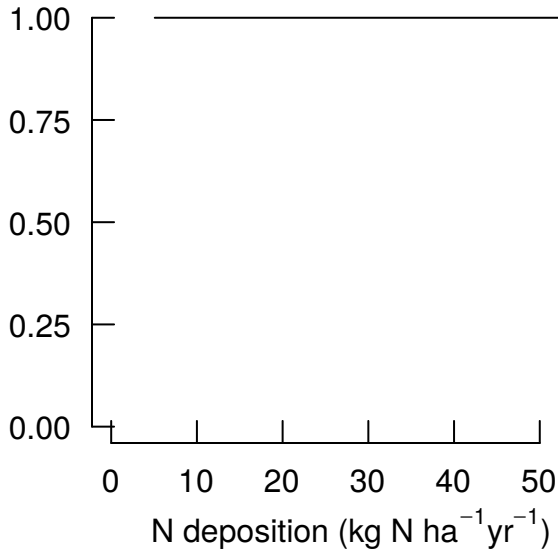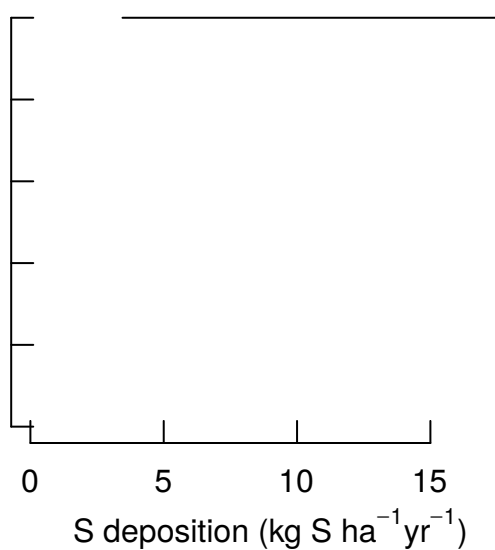

**hackberry**  
*Celtis occidentalis*

**N deposition**

**S deposition**

growth: sample size= 4902 , N & S corr.= 0.17 , VIF\_N= 1.45 , VIF\_S= 1.58

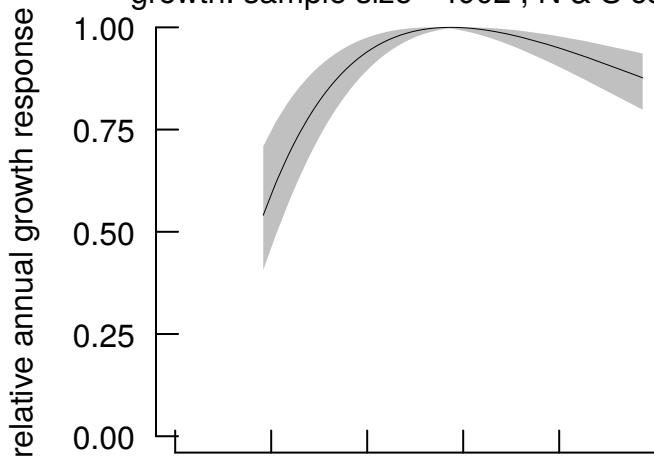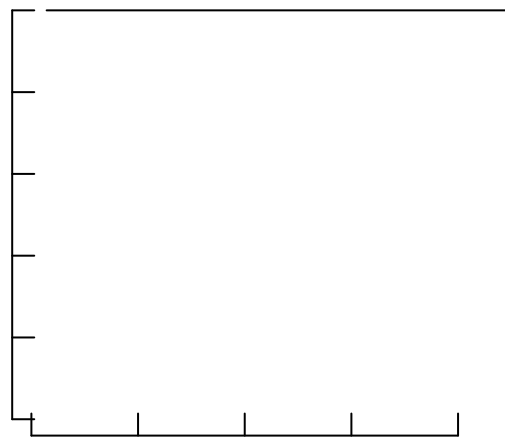

survival: sample size= 5495 , N & S corr.= 0.18 , VIF\_N= 1.46 , VIF\_S= 1.58

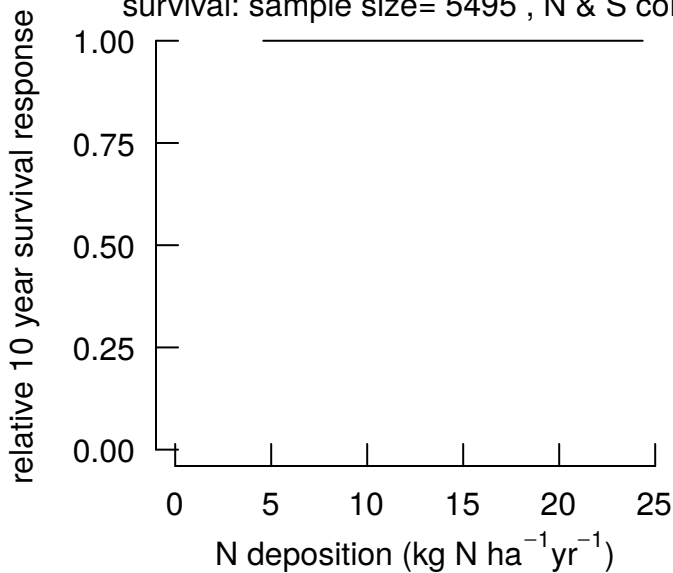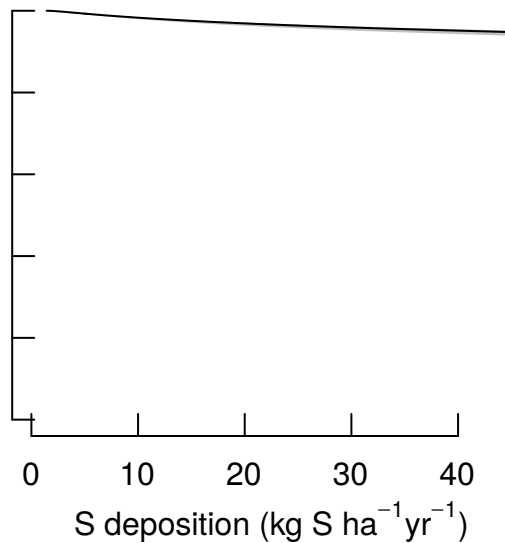

# American beech

*Fagus grandifolia*

## N deposition

## S deposition

growth: sample size= 20894 , N & S corr.= 0.76 , VIF\_N= 2.96 , VIF\_S= 2.41

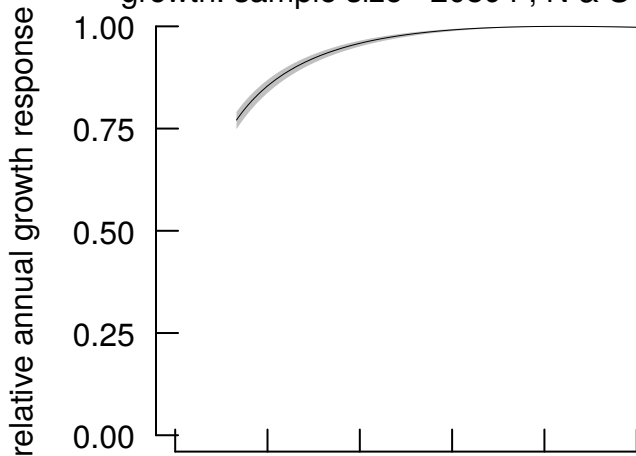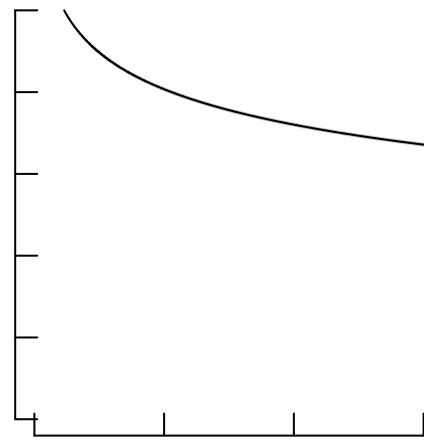

survival: sample size= 24091 , N & S corr.= 0.76 , VIF\_N= 2.97 , VIF\_S= 2.4

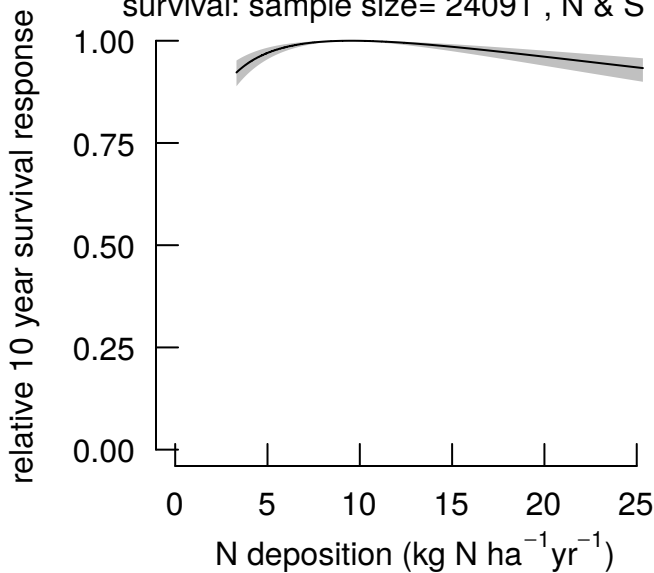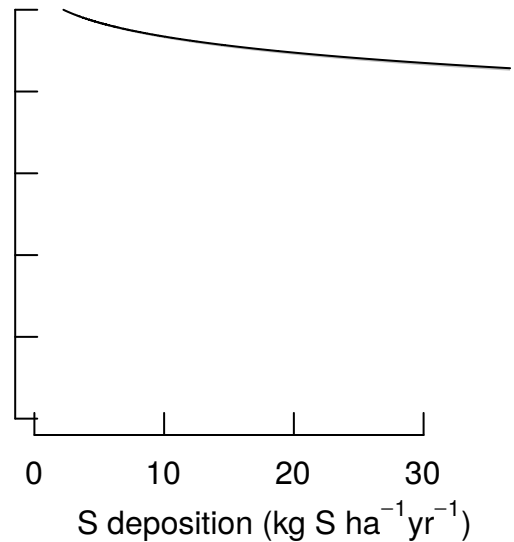

**white ash**  
*Fraxinus americana*

**N deposition**

**S deposition**

growth: sample size= 17266 , N & S corr.= 0.54 , VIF\_N= 1.82 , VIF\_S= 1.48

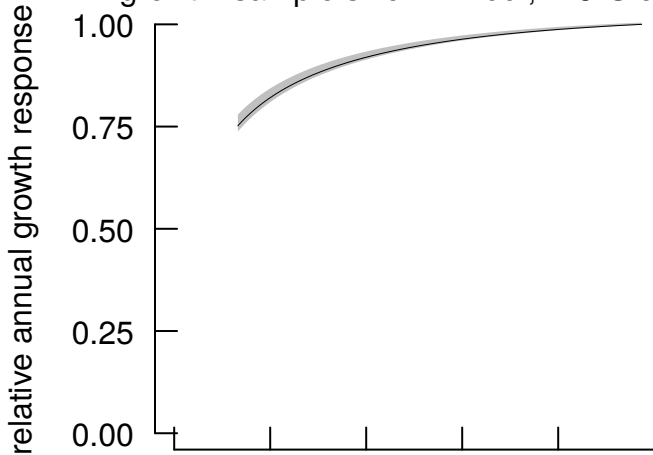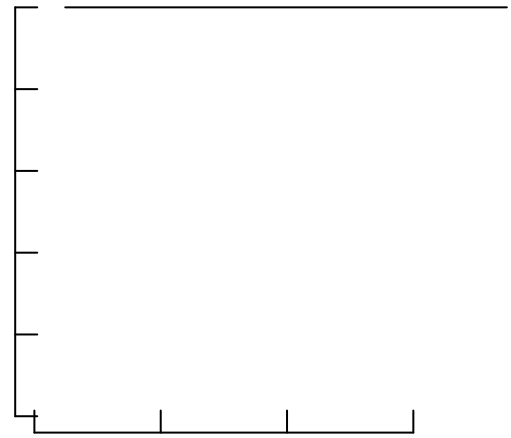

survival: sample size= 20060 , N & S corr.= 0.53 , VIF\_N= 1.78 , VIF\_S= 1.45

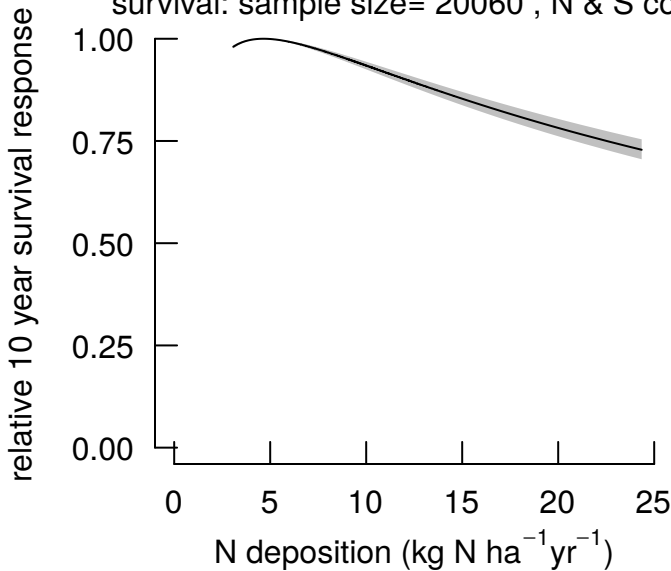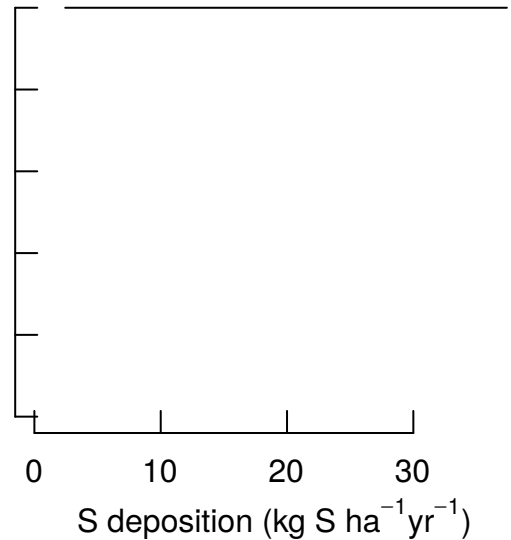

**black ash**  
*Fraxinus nigra*

**N deposition**

**S deposition**

growth: sample size= 11873 , N & S corr.= 0.62 , VIF\_N= 2.22 , VIF\_S= 3.01

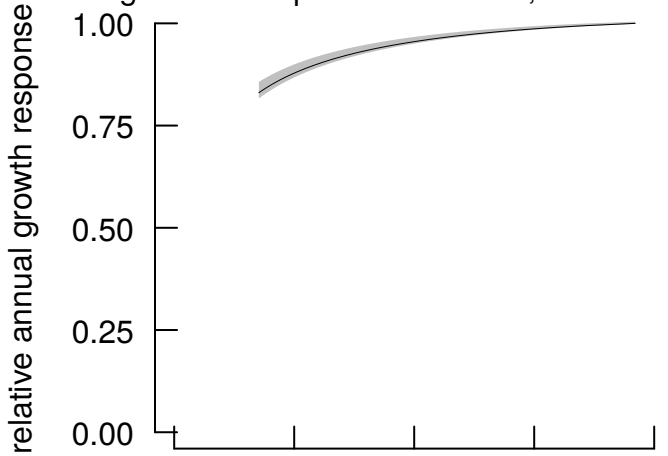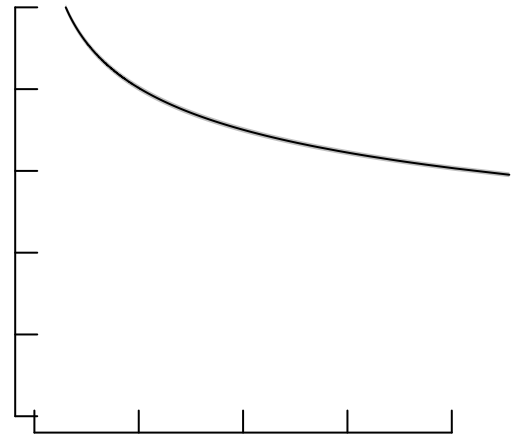

survival: sample size= 13528 , N & S corr.= 0.62 , VIF\_N= 2.26 , VIF\_S= 2.99

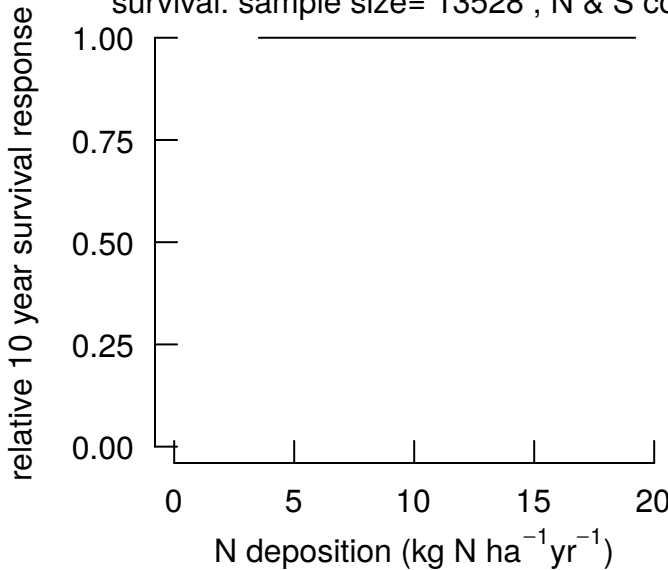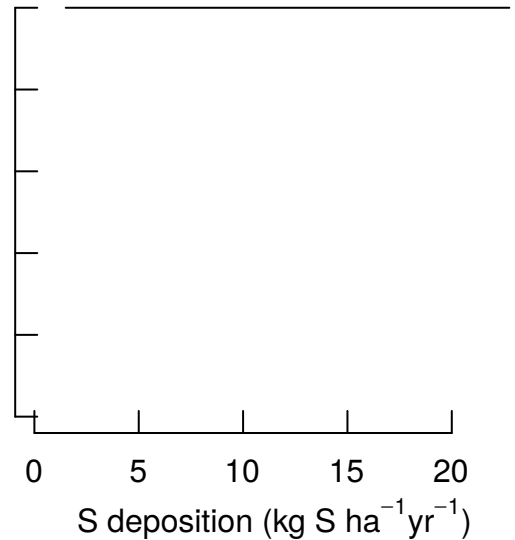



**green ash**

*Fraxinus pennsylvanica*

**N deposition**

**S deposition**

growth: sample size= 15573 , N & S corr.= 0.45 , VIF\_N= 1.26 , VIF\_S= 1.61

relative annual growth response

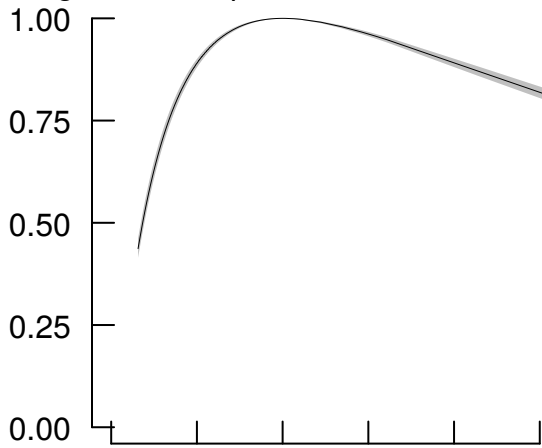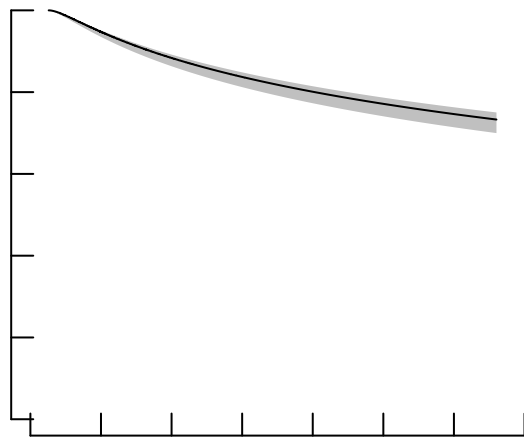

relative 10 year survival response

survival: sample size= 18623 , N & S corr.= 0.45 , VIF\_N= 1.27 , VIF\_S= 1.62

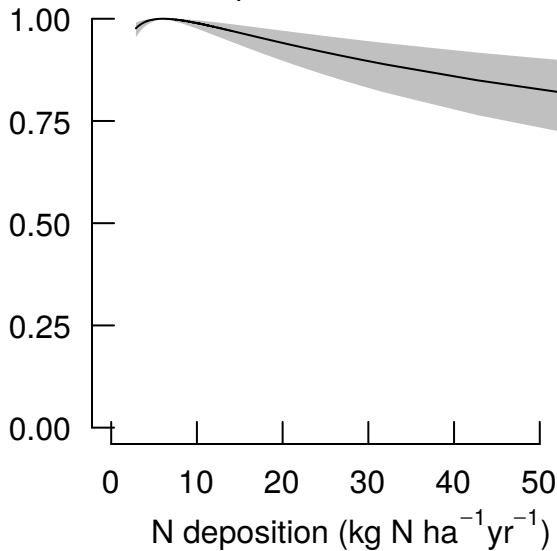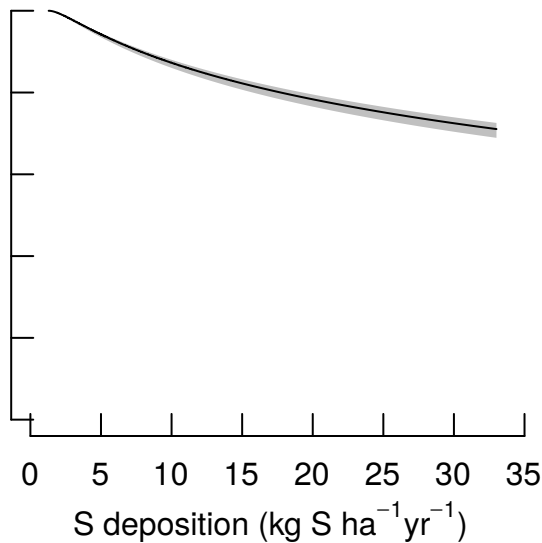

**honeylocust**  
*Gleditsia triacanthos*

**N deposition**

**S deposition**

growth: sample size= 2009 , N & S corr.= 0.27 , VIF\_N= 2.13 , VIF\_S= 1.43

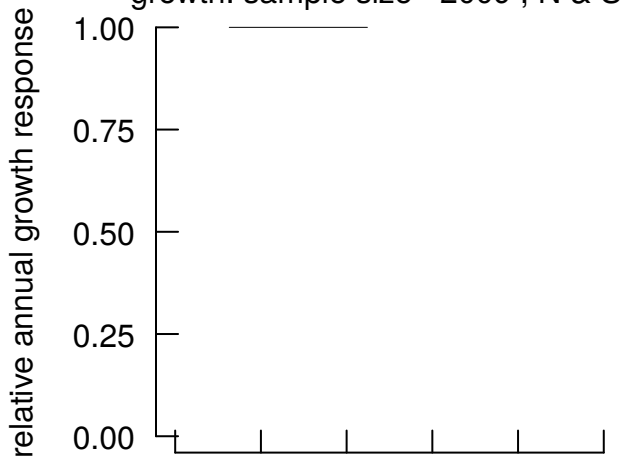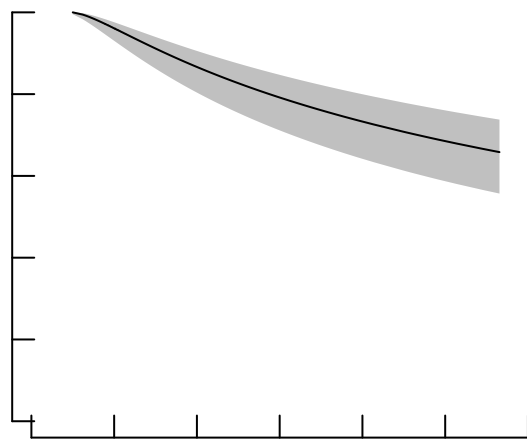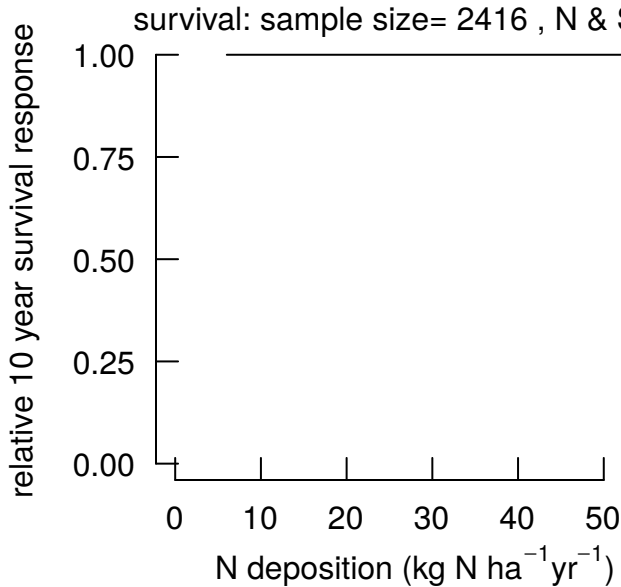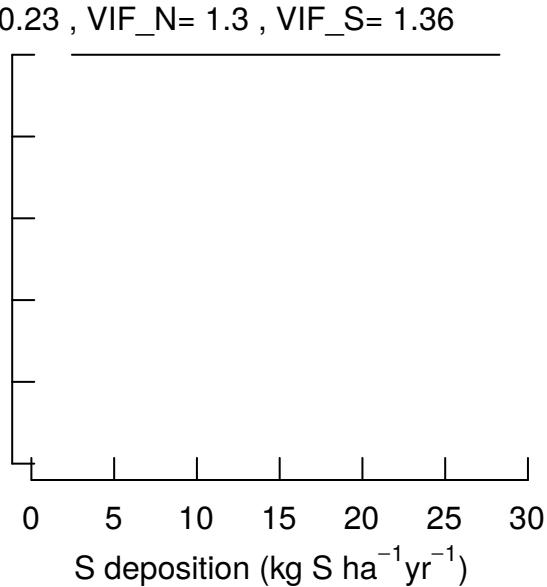

**black walnut**

*Juglans nigra*

**N deposition**

**S deposition**

growth: sample size= 5666 , N & S corr.= 0.076 , VIF\_N= 1.25 , VIF\_S= 1.24

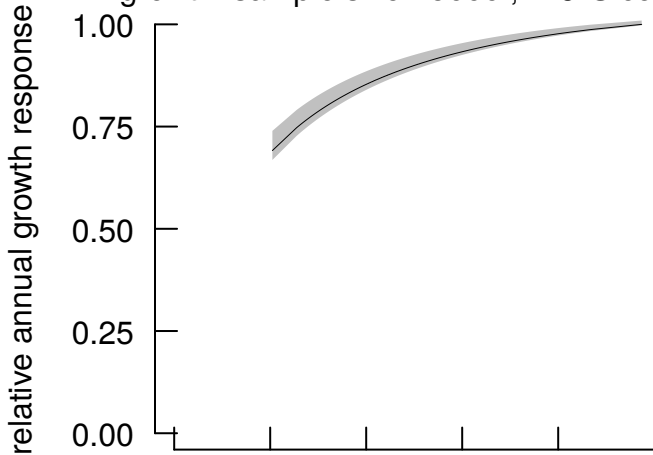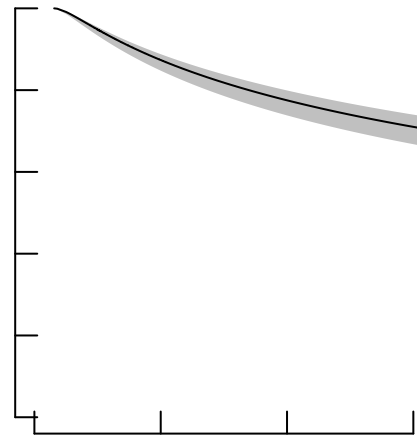

survival: sample size= 6514 , N & S corr.= 0.081 , VIF\_N= 1.22 , VIF\_S= 1.24

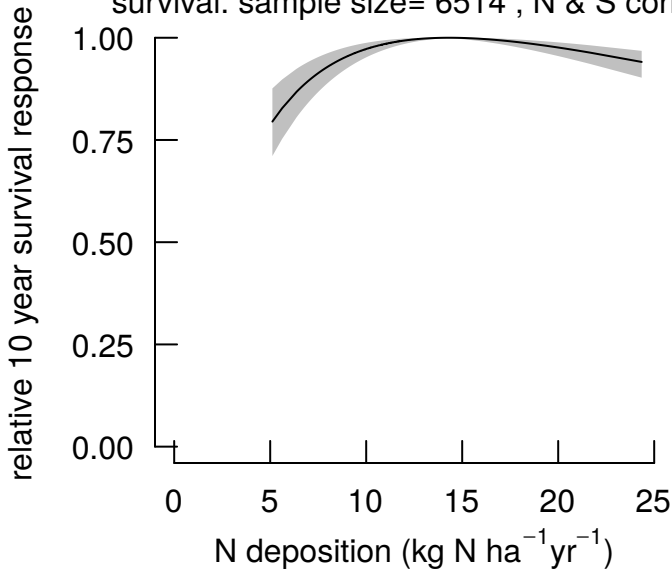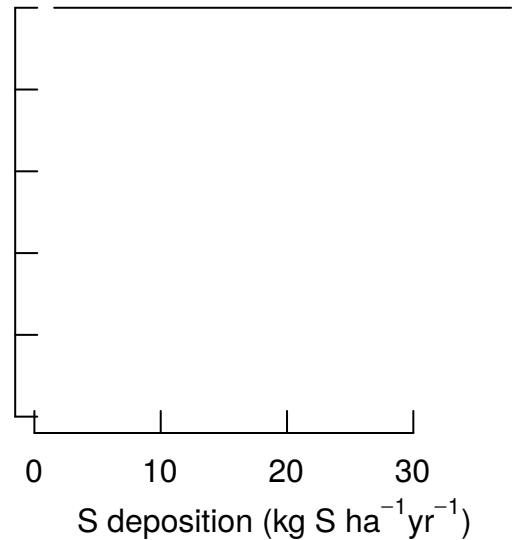

**sweetgum**

*Liquidambar styraciflua*

**N deposition**

**S deposition**

growth: sample size= 29180 , N & S corr.= 0.37 , VIF\_N= 1.25 , VIF\_S= 1.41

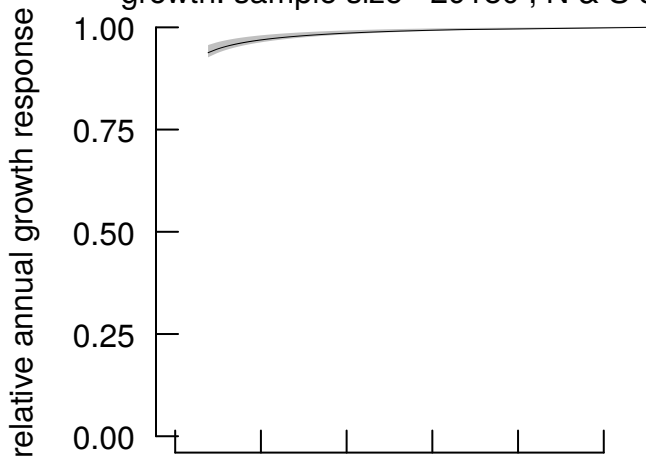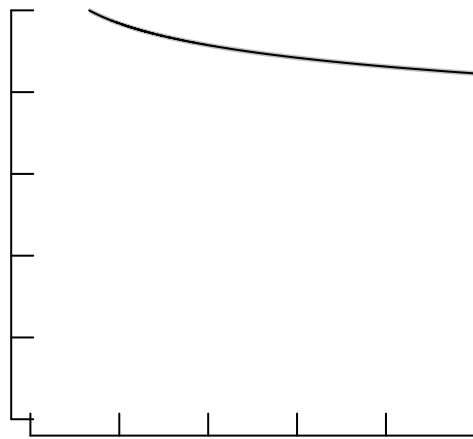

survival: sample size= 36961 , N & S corr.= 0.37 , VIF\_N= 1.24 , VIF\_S= 1.42

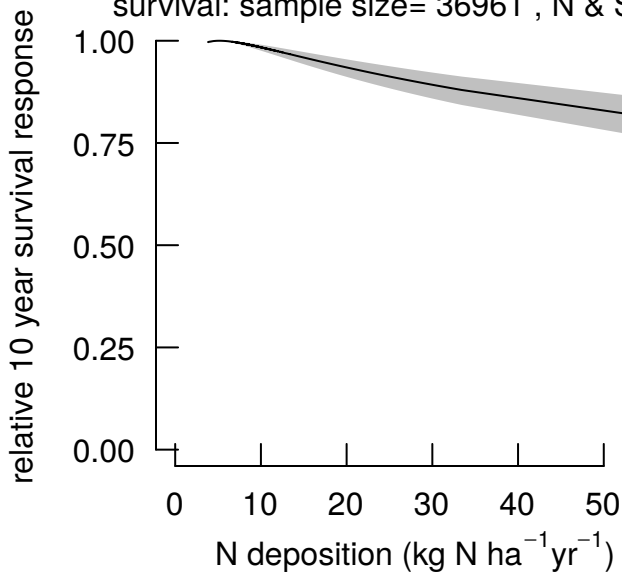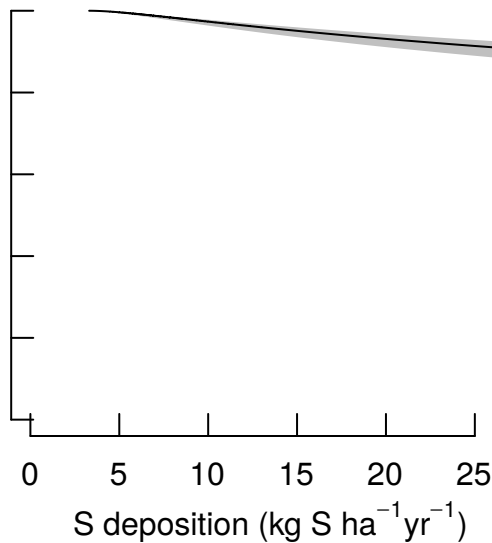

**yellow-poplar**  
*Liriodendron tulipifera*

**N deposition**

**S deposition**

growth: sample size= 24182 , N & S corr.= 0.41 , VIF\_N= 1.21 , VIF\_S= 1.93

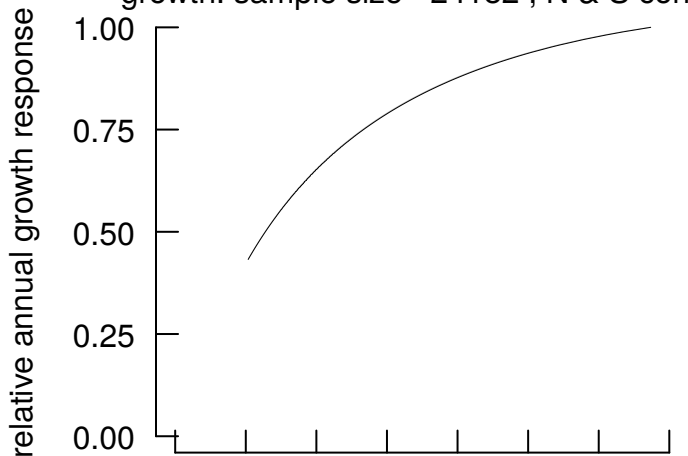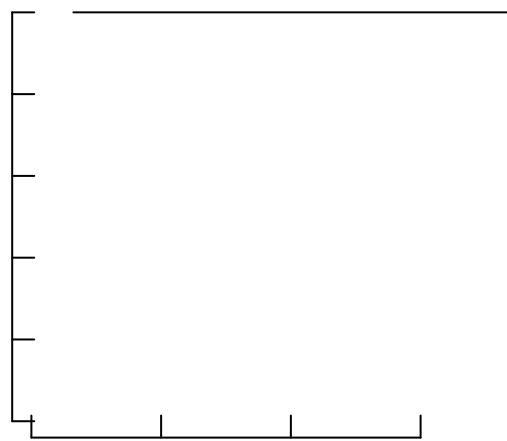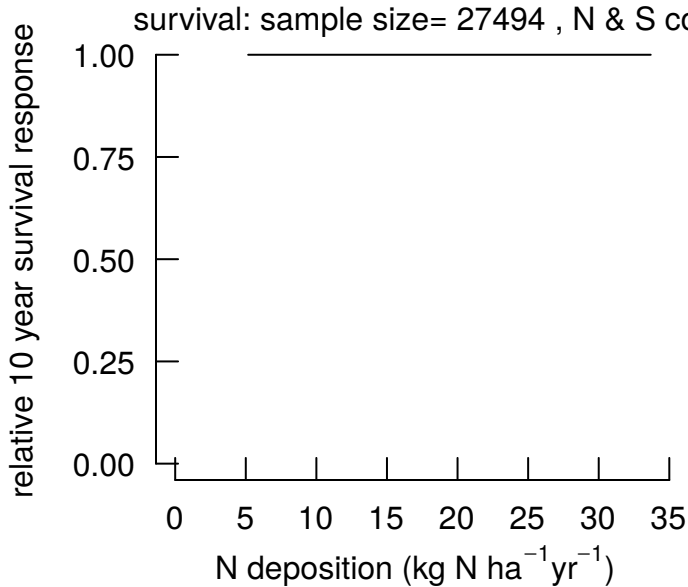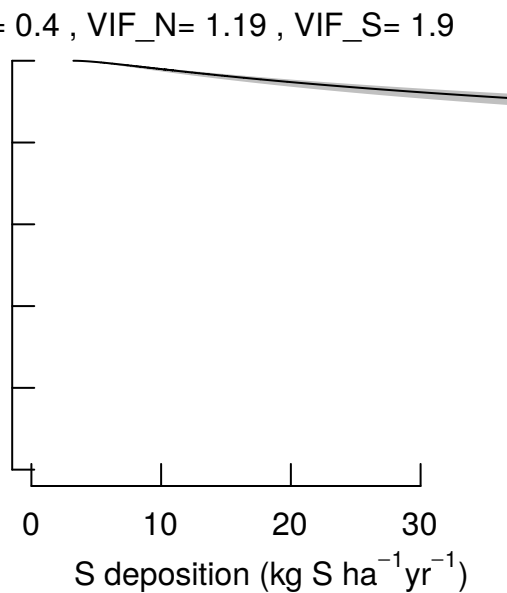

**tanoak**

*Lithocarpus densiflorus*

**N deposition**

**S deposition**

growth: sample size= 3009 , N & S corr.= 0.57 , VIF\_N= 1.68 , VIF\_S= 2.55

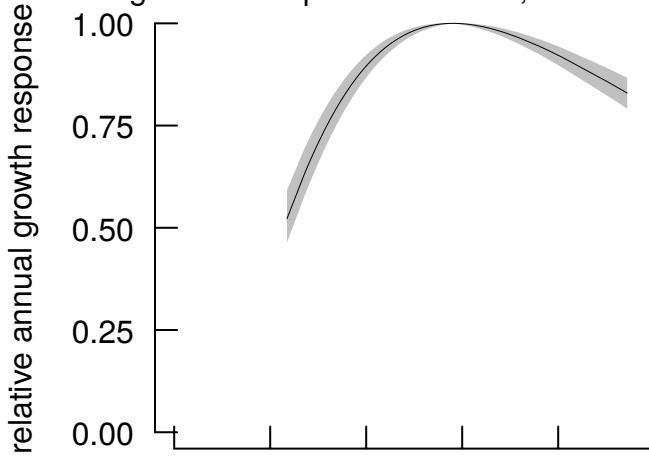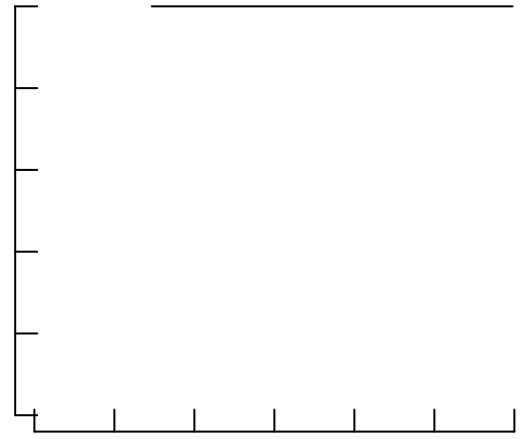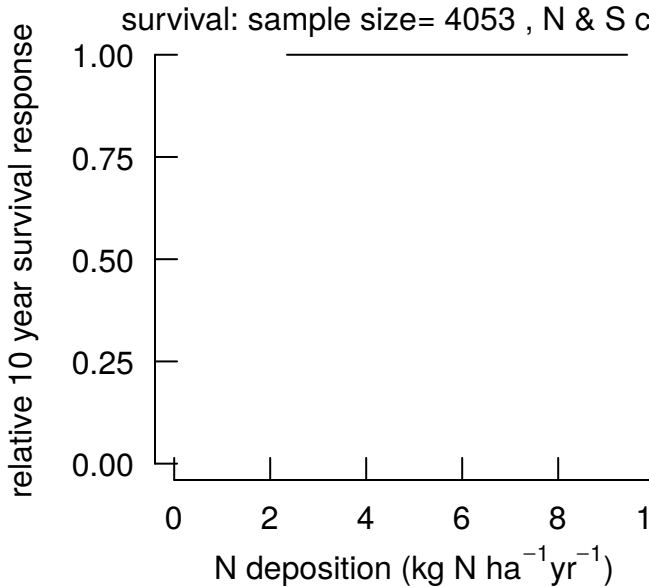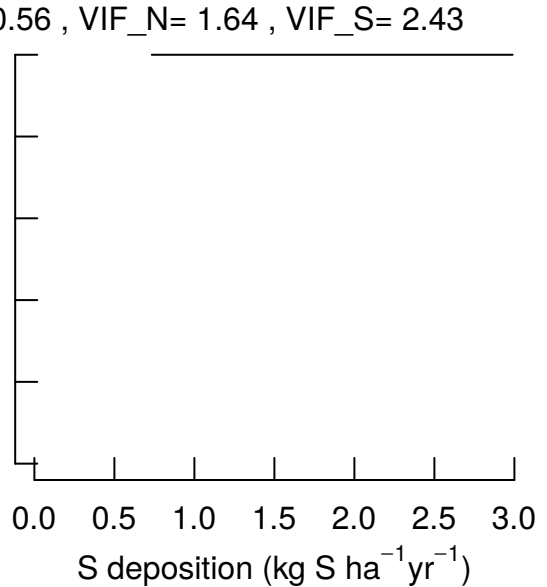

survival: sample size= 4053 , N & S corr.= 0.56 , VIF\_N= 1.64 , VIF\_S= 2.43

**Osage-orange**  
*Maclura pomifera*

**N deposition**

**S deposition**

growth: sample size= 2384 , N & S corr.= 0.36 , VIF\_N= 1.52 , VIF\_S= 1.45

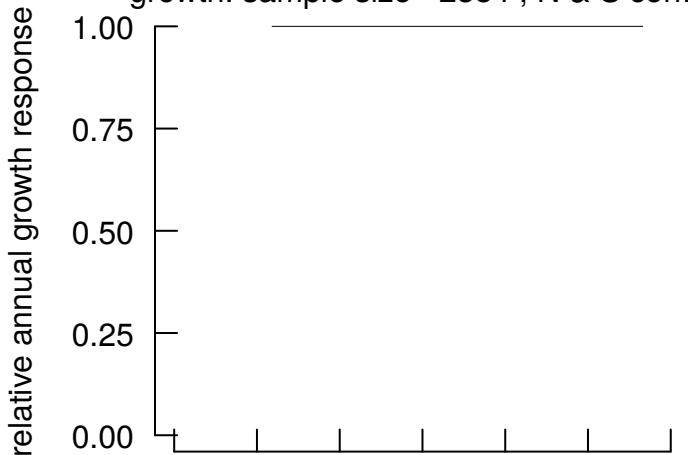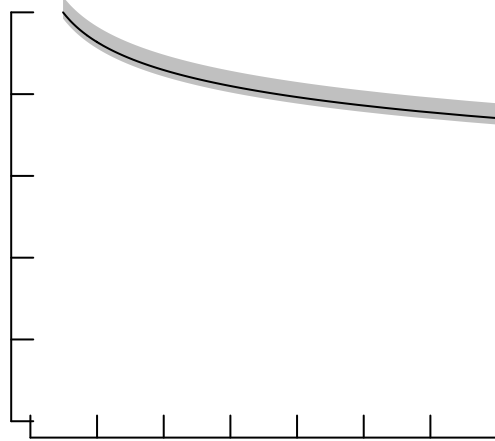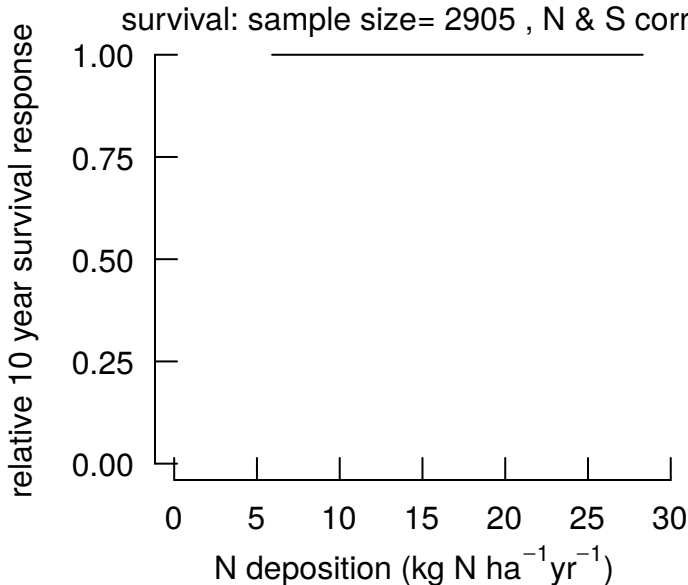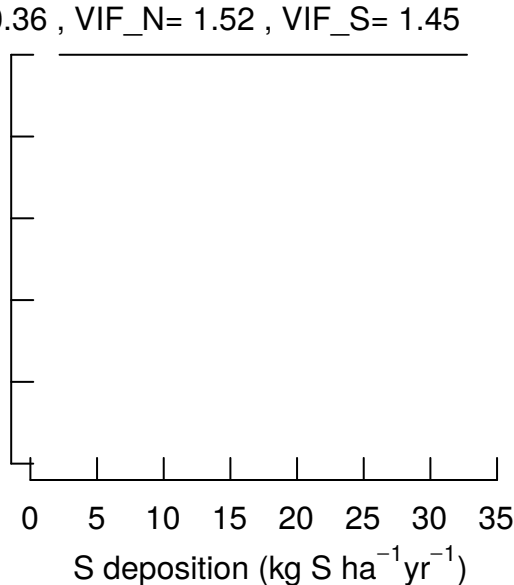

**sweetbay**  
*Magnolia virginiana*

**N deposition**

**S deposition**

growth: sample size= 3263 , N & S corr.= 0.34 , VIF\_N= 1.37 , VIF\_S= 1.56

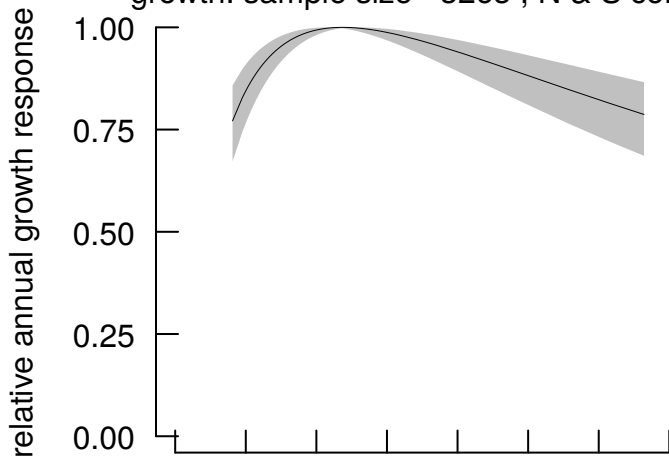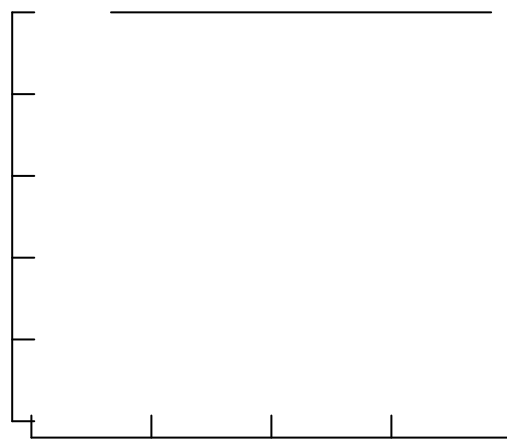

survival: sample size= 4178 , N & S corr.= 0.35 , VIF\_N= 1.38 , VIF\_S= 1.59

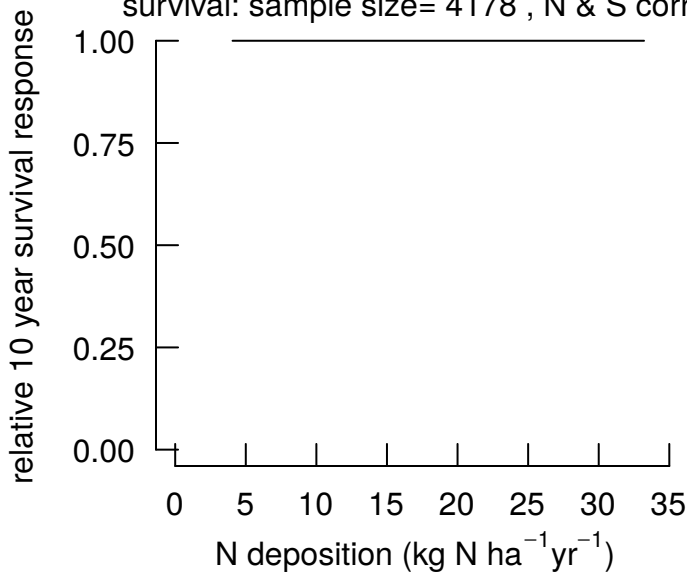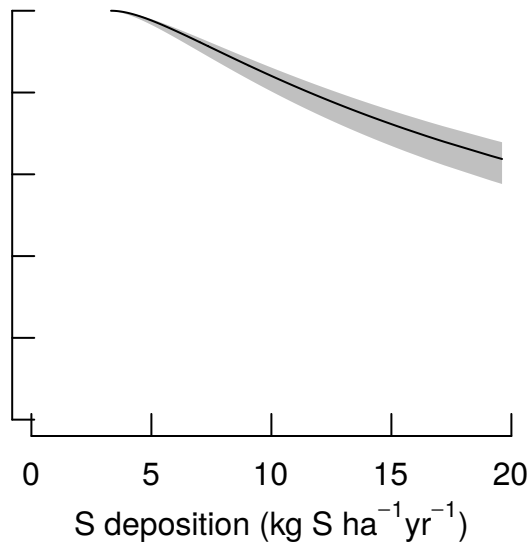



**water tupelo**  
*Nyssa aquatica*

**N deposition**

**S deposition**

growth: sample size= 2607 , N & S corr.= 0.5 , VIF\_N= 1.34 , VIF\_S= 1.48

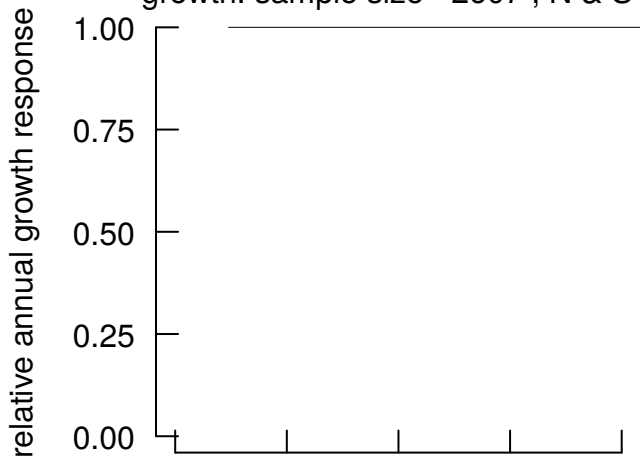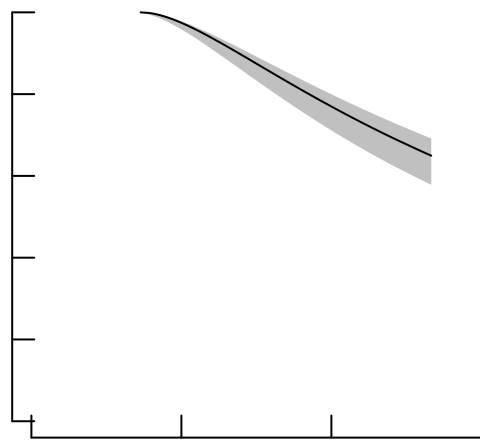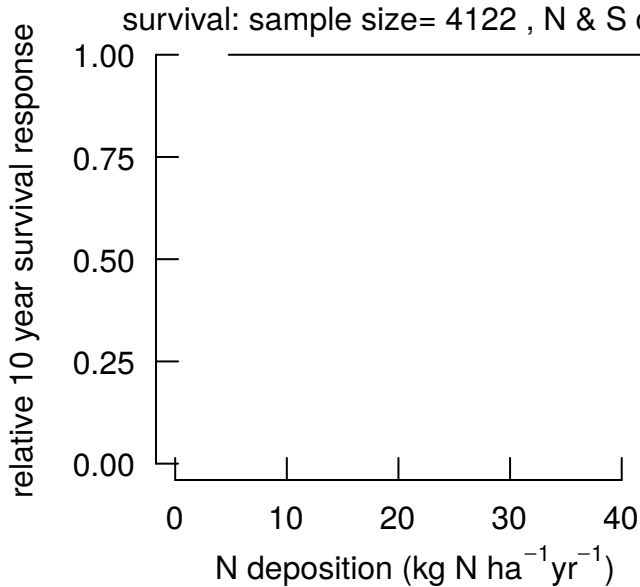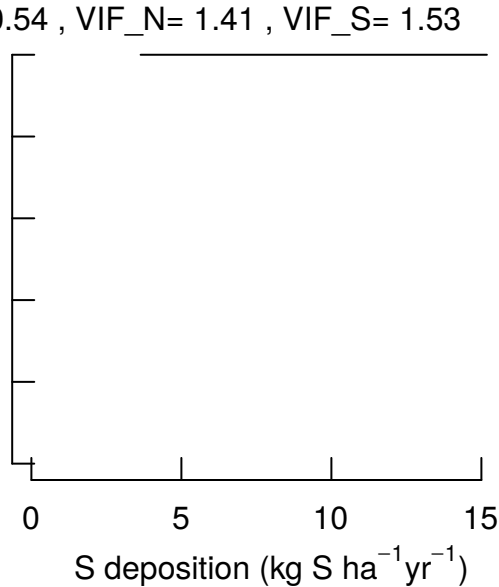

survival: sample size= 4122 , N & S corr.= 0.54 , VIF\_N= 1.41 , VIF\_S= 1.53

**blackgum**  
*Nyssa sylvatica*

**N deposition**

**S deposition**

growth: sample size= 10524 , N & S corr.= 0.43 , VIF\_N= 1.28 , VIF\_S= 1.85

relative annual growth response

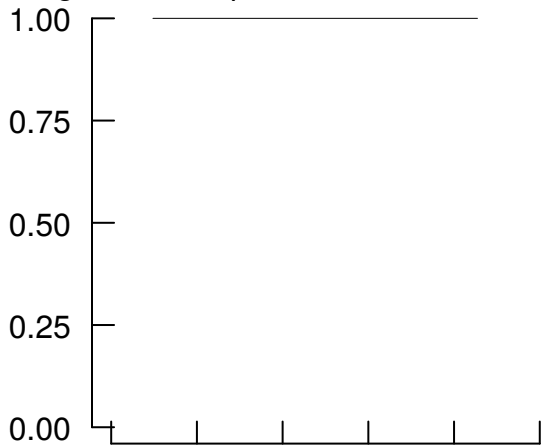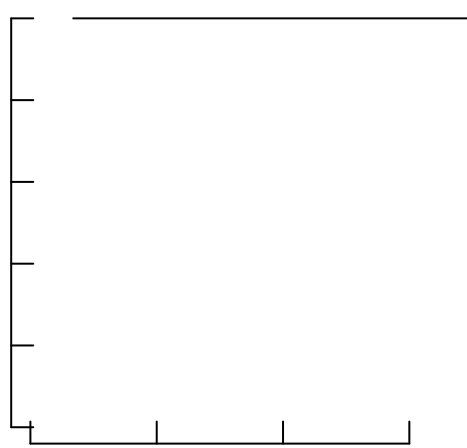

relative 10 year survival response

survival: sample size= 13364 , N & S corr.= 0.42 , VIF\_N= 1.26 , VIF\_S= 1.83

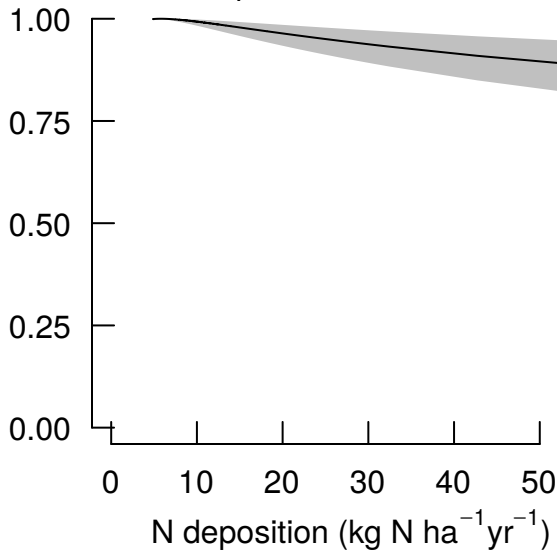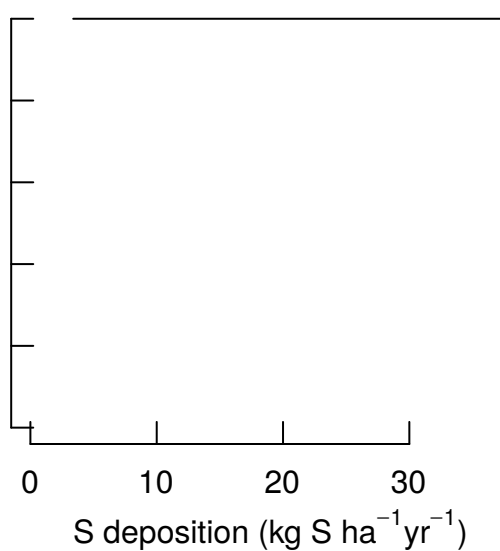

# swamp tupelo

*Nyssa biflora*

## N deposition

## S deposition

growth: sample size= 7936 , N & S corr.= 0.47 , VIF\_N= 1.49 , VIF\_S= 1.85

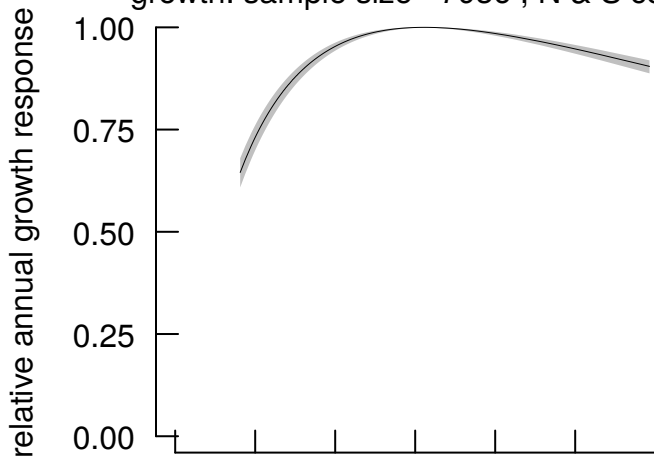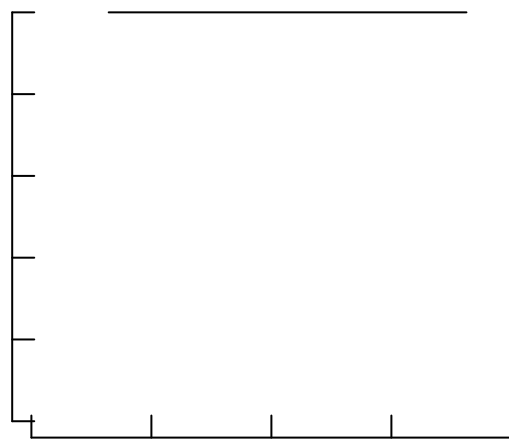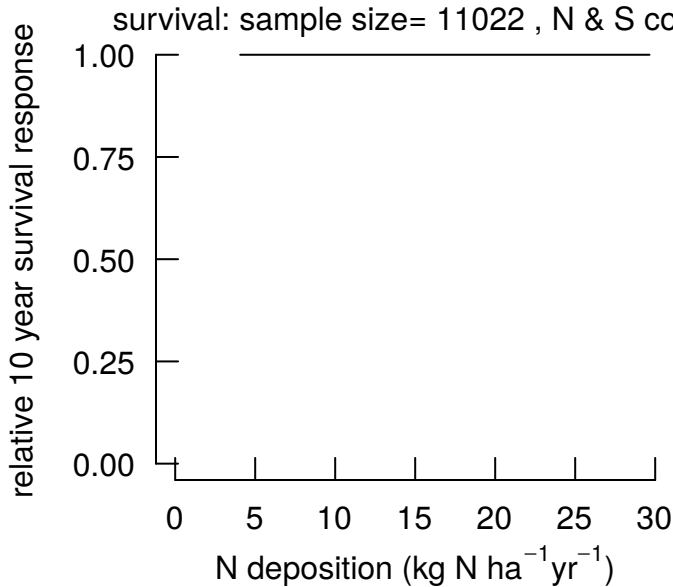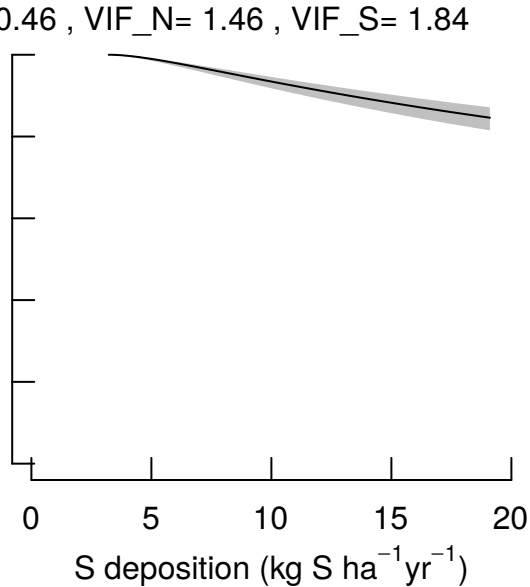

# eastern hophornbeam

*Ostrya virginiana*

## N deposition

## S deposition

growth: sample size= 4227 , N & S corr.= 0.36 , VIF\_N= 1.48 , VIF\_S= 1.38

relative annual growth response

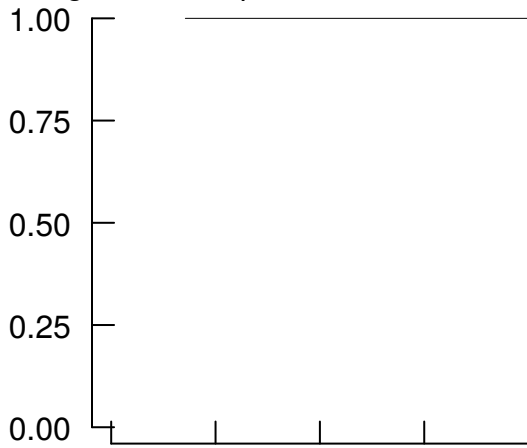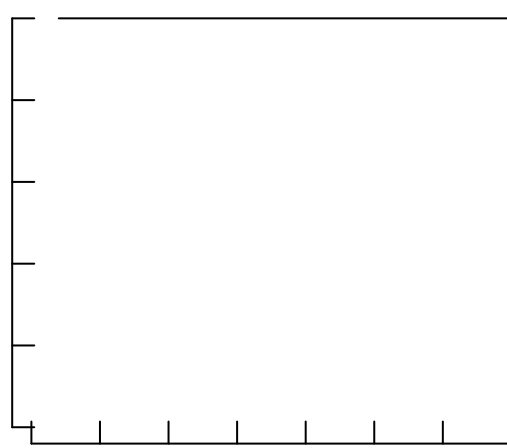

relative 10 year survival response

survival: sample size= 5881 , N & S corr.= 0.36 , VIF\_N= 1.44 , VIF\_S= 1.37

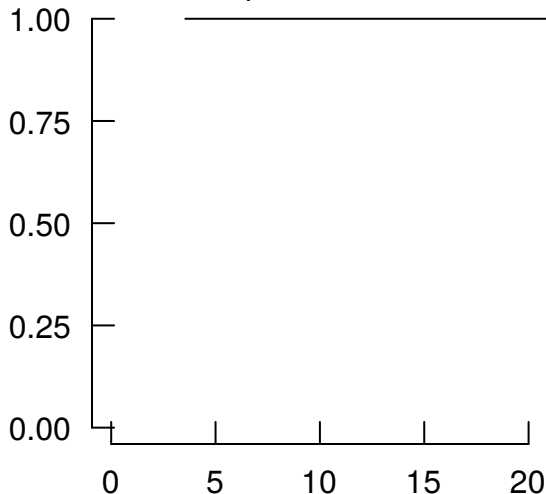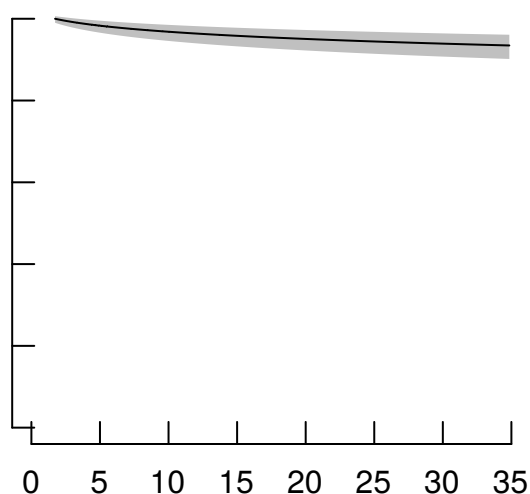

N deposition ( $\text{kg N ha}^{-1}\text{yr}^{-1}$ )

S deposition ( $\text{kg S ha}^{-1}\text{yr}^{-1}$ )

**sourwood**

*Oxydendrum arboreum*

**N deposition**

**S deposition**

growth: sample size= 6977 , N & S corr.= 0.28 , VIF\_N= 1.25 , VIF\_S= 1.51

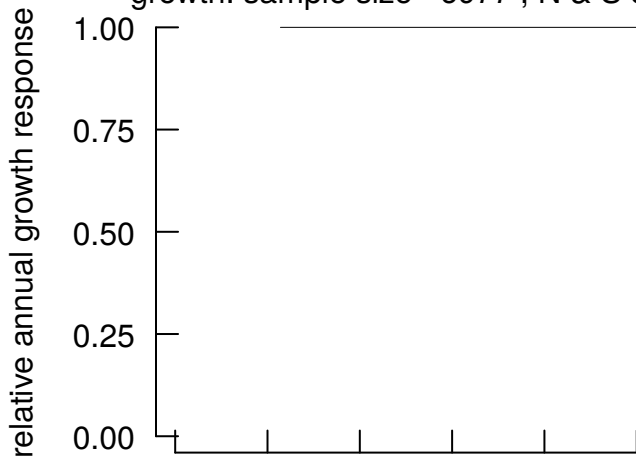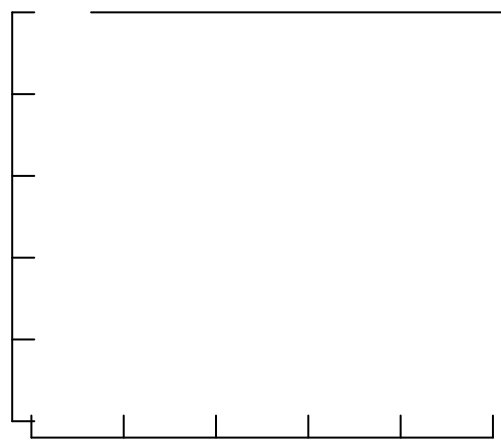

survival: sample size= 8892 , N & S corr.= 0.3 , VIF\_N= 1.27 , VIF\_S= 1.54

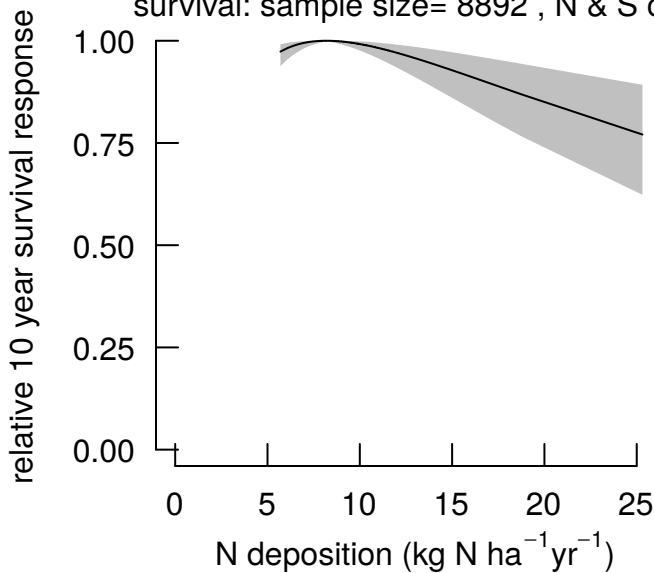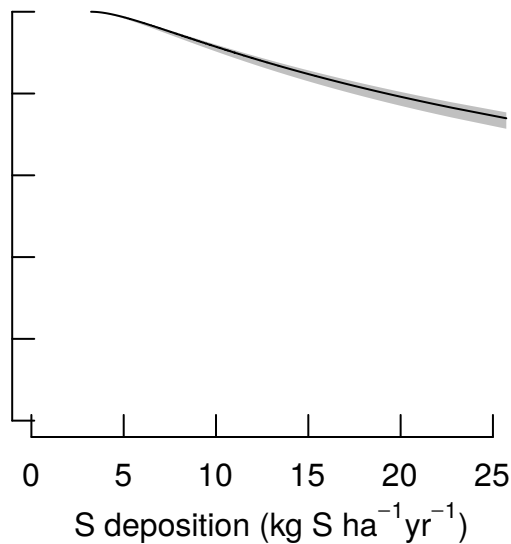

# American sycamore

*Platanus occidentalis*

## N deposition

## S deposition

growth: sample size= 2593 , N & S corr.= 0.38 , VIF\_N= 1.25 , VIF\_S= 1.68

relative annual growth response

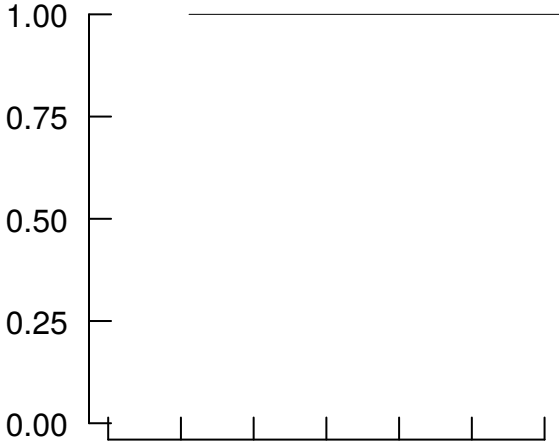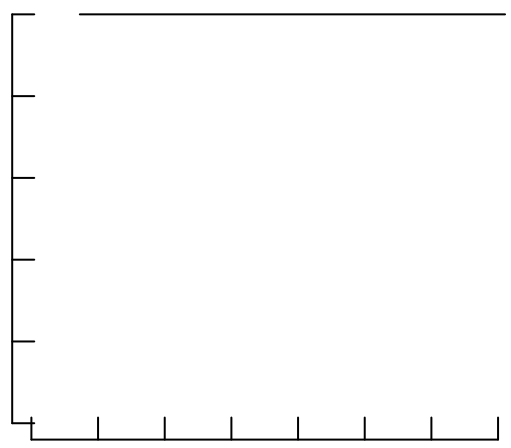

survival: sample size= 3033 , N & S corr.= 0.39 , VIF\_N= 1.29 , VIF\_S= 1.68

relative 10 year survival response

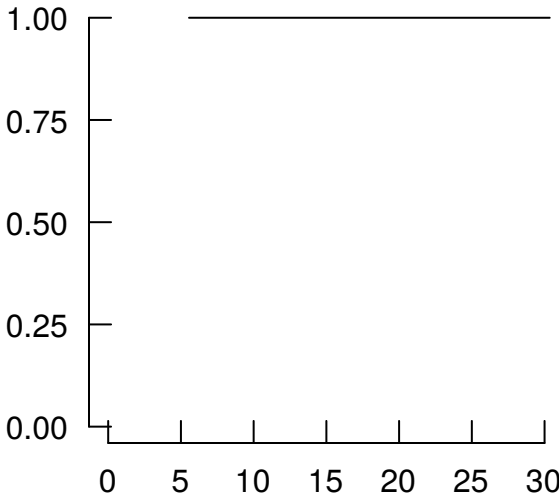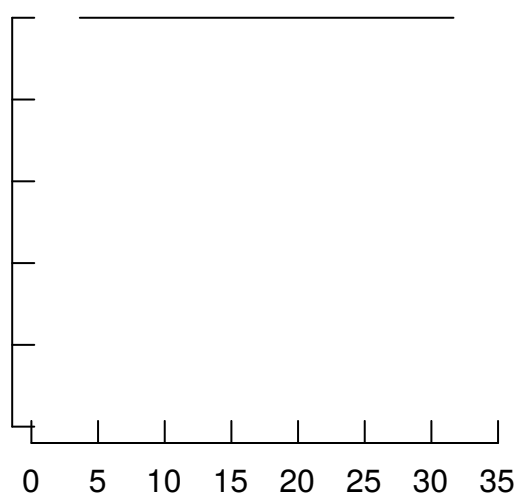

N deposition (kg N ha<sup>-1</sup>yr<sup>-1</sup>)

S deposition (kg S ha<sup>-1</sup>yr<sup>-1</sup>)

**balsam poplar**  
*Populus balsamifera*

**N deposition**

**S deposition**

growth: sample size= 3428 , N & S corr.= 0.62 , VIF\_N= 2.6 , VIF\_S= 4.34

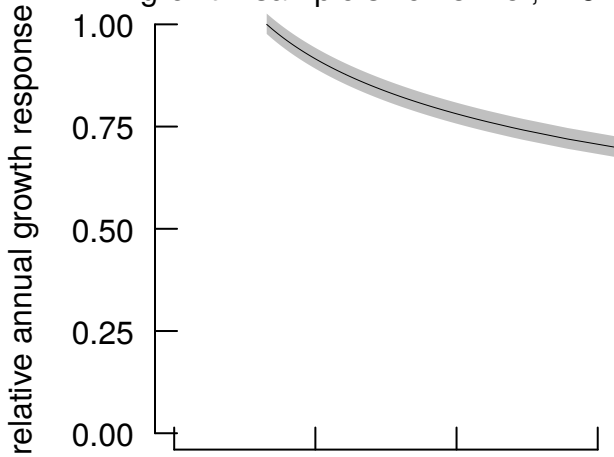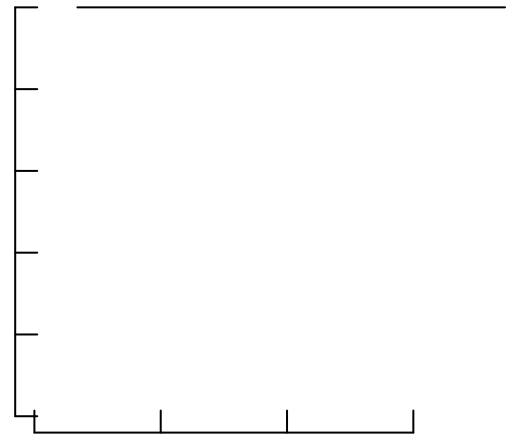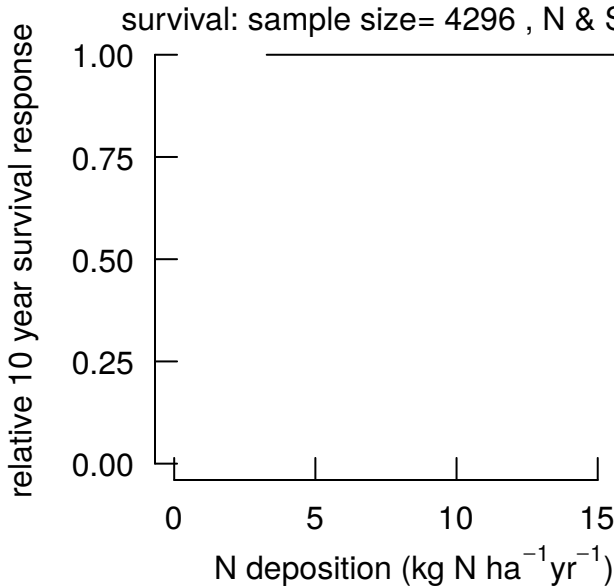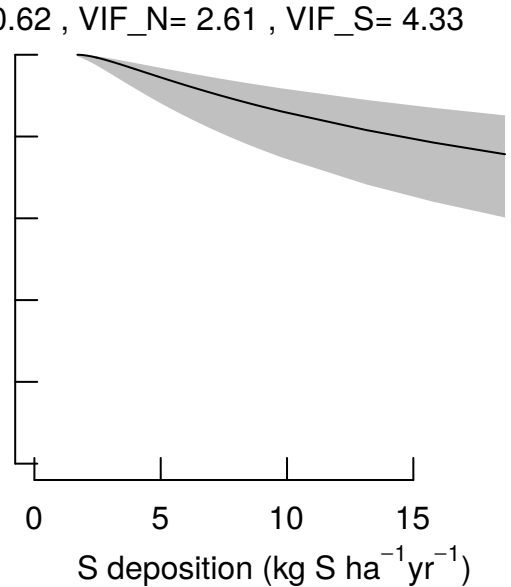

**bigtooth aspen**  
*Populus grandidentata*

**N deposition**

**S deposition**

growth: sample size= 10041 , N & S corr.= 0.57 , VIF\_N= 2.31 , VIF\_S= 2.37

relative annual growth response

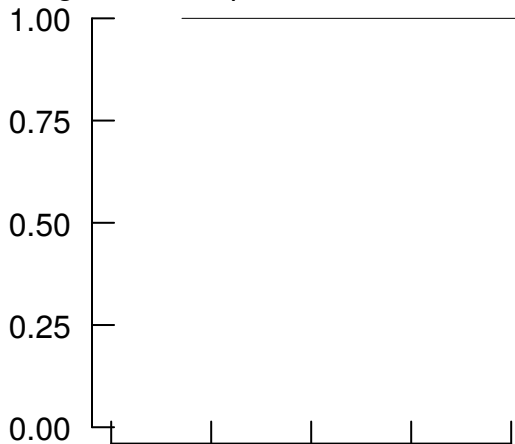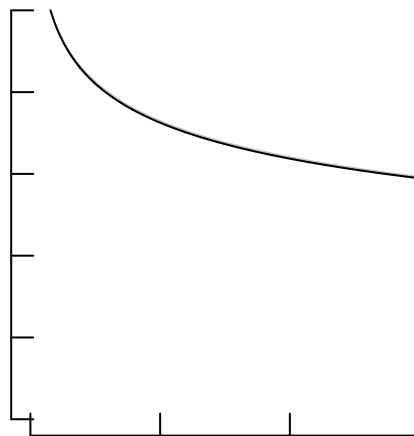

relative 10 year survival response

survival: sample size= 11473 , N & S corr.= 0.57 , VIF\_N= 2.31 , VIF\_S= 2.35

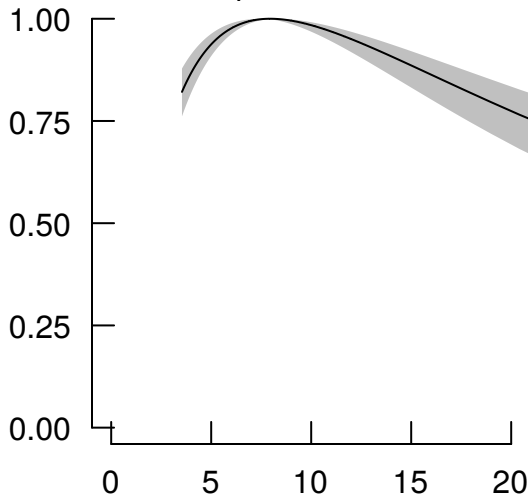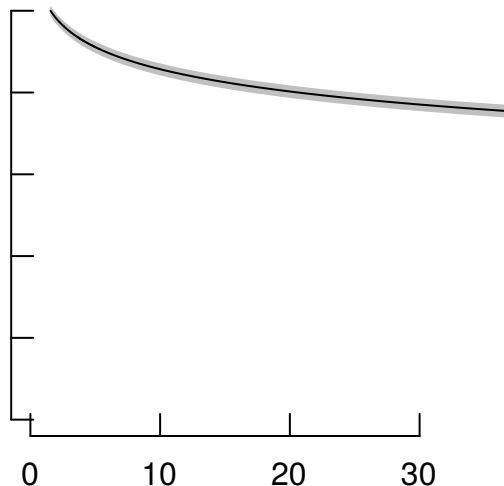

N deposition (kg N ha<sup>-1</sup> yr<sup>-1</sup>)

S deposition (kg S ha<sup>-1</sup> yr<sup>-1</sup>)



**quaking aspen**  
*Populus tremuloides*

**N deposition**

**S deposition**

growth: sample size= 41748 , N & S corr.= 0.6 , VIF\_N= 1.78 , VIF\_S= 2.23

relative annual growth response

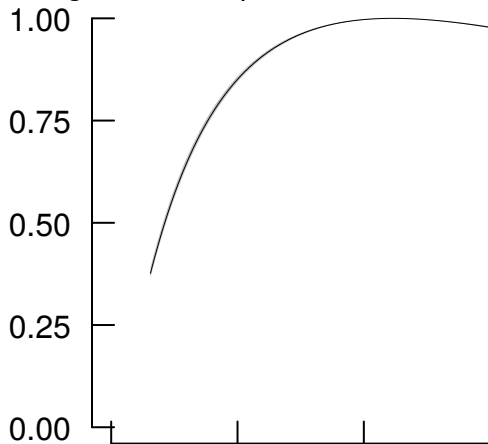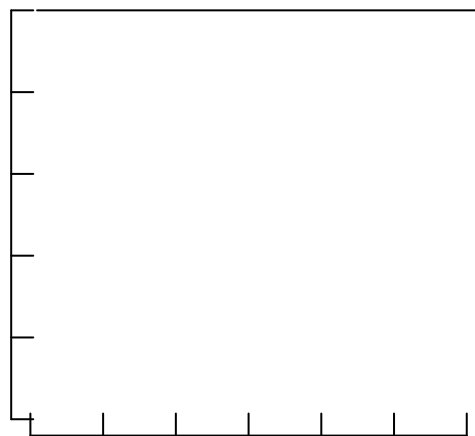

relative 10 year survival response

survival: sample size= 51305 , N & S corr.= 0.61 , VIF\_N= 1.78 , VIF\_S= 2.26

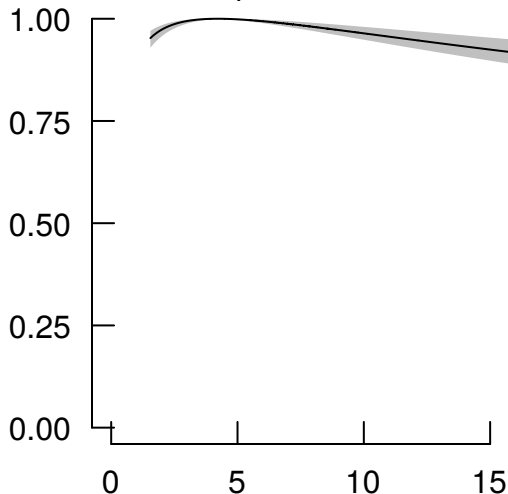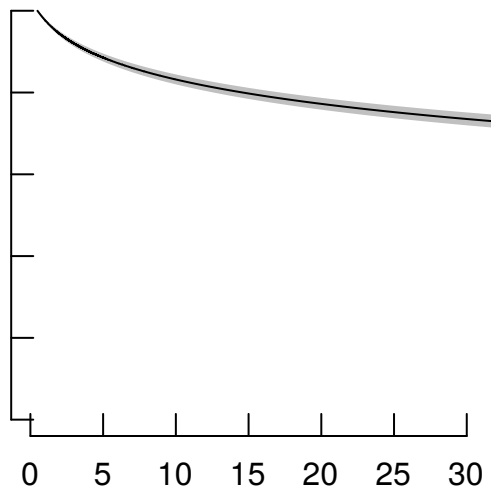

N deposition (kg N ha<sup>-1</sup> yr<sup>-1</sup>)

S deposition (kg S ha<sup>-1</sup> yr<sup>-1</sup>)

**black cherry**  
*Prunus serotina*

**N deposition**

**S deposition**

growth: sample size= 20446 , N & S corr.= 0.33 , VIF\_N= 1.21 , VIF\_S= 1.26

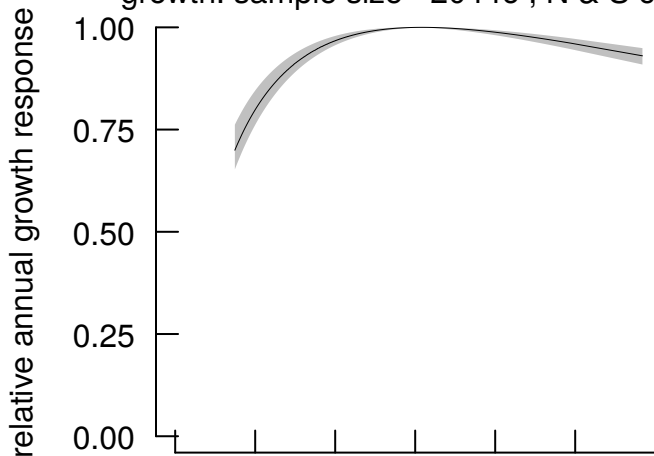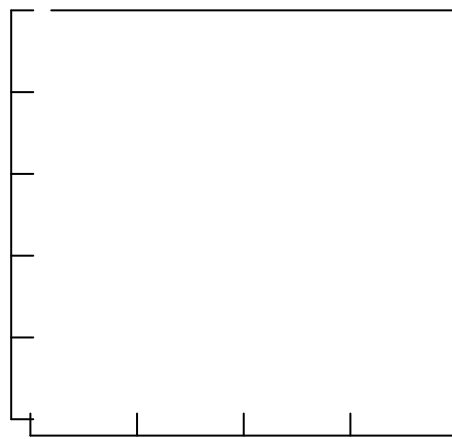

survival: sample size= 24253 , N & S corr.= 0.33 , VIF\_N= 1.21 , VIF\_S= 1.26

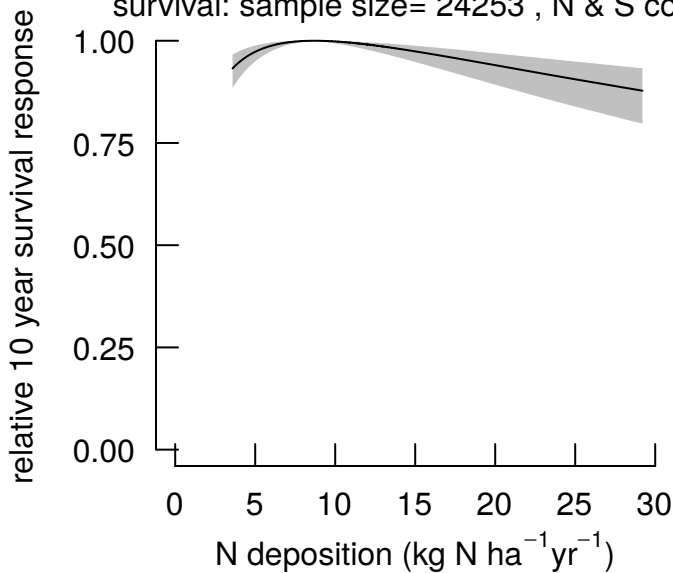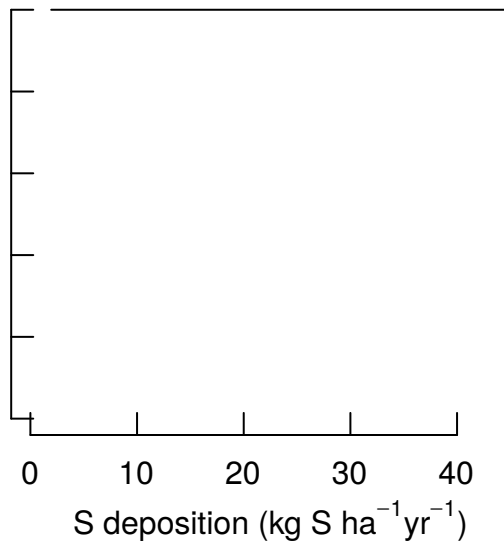

**white oak**  
*Quercus alba*

**N deposition**

**S deposition**

growth: sample size= 40800 , N & S corr.= 0.16 , VIF\_N= 1.03 , VIF\_S= 1.12

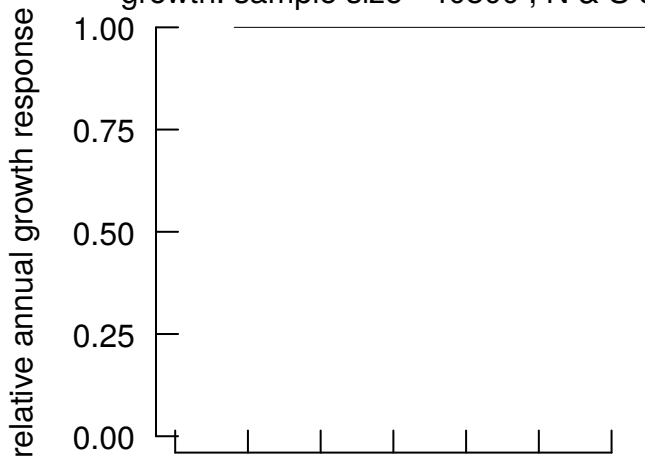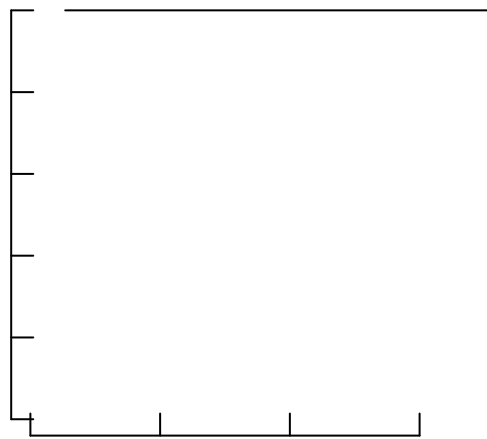

survival: sample size= 46498 , N & S corr.= 0.17 , VIF\_N= 1.04 , VIF\_S= 1.13

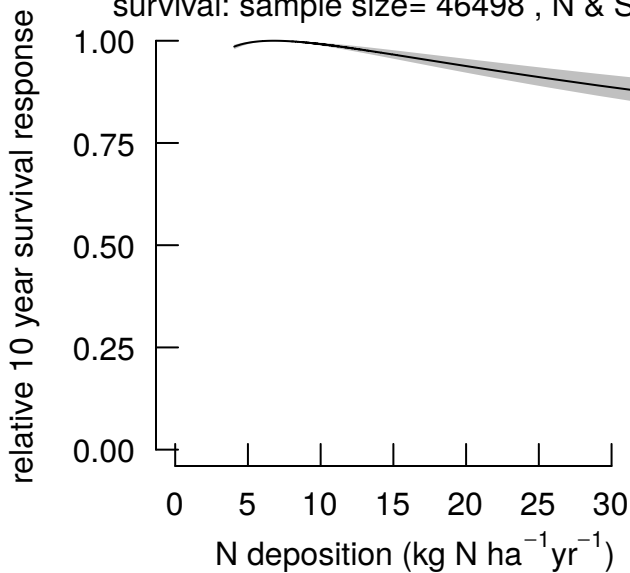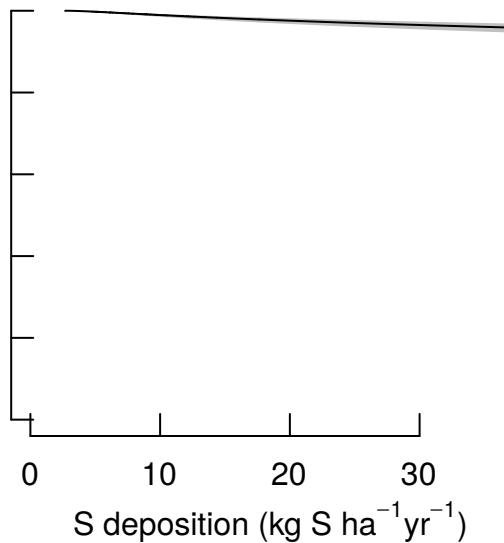

**canyon live oak**  
*Quercus chrysolepis*

**N deposition**

**S deposition**

growth: sample size= 2683 , N & S corr.= 0.41 , VIF\_N= 2.95 , VIF\_S= 4.32

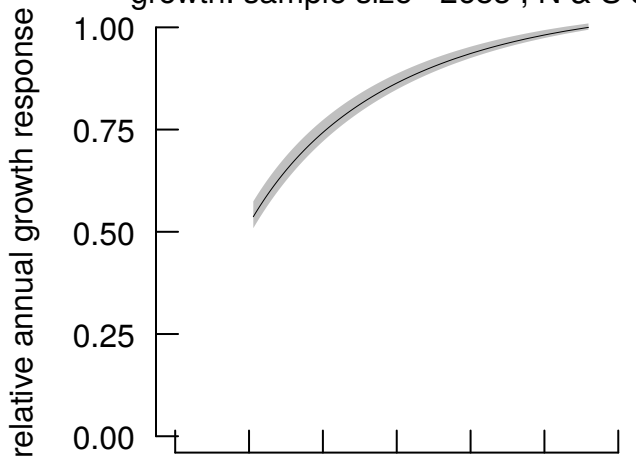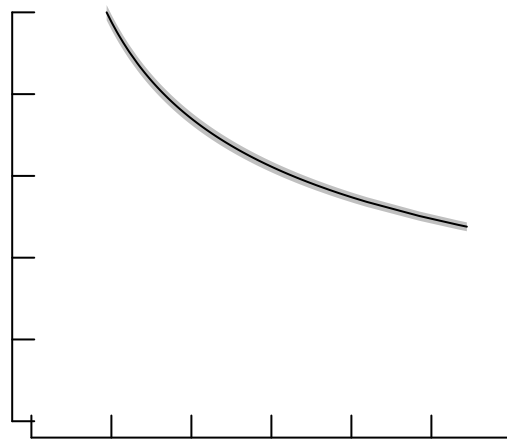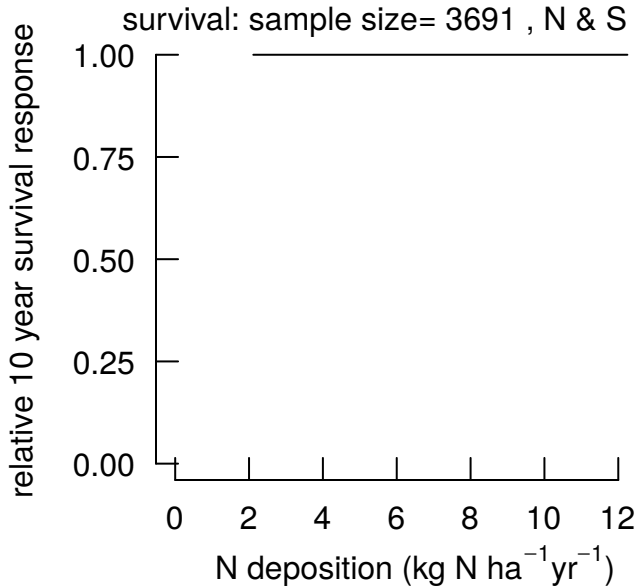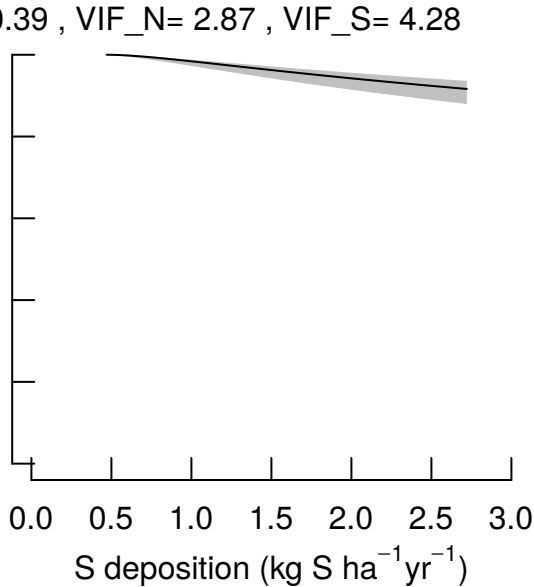

**scarlet oak**  
*Quercus coccinea*

**N deposition**

**S deposition**

growth: sample size= 9167 , N & S corr.= 0.37 , VIF\_N= 1.28 , VIF\_S= 1.62

relative annual growth response

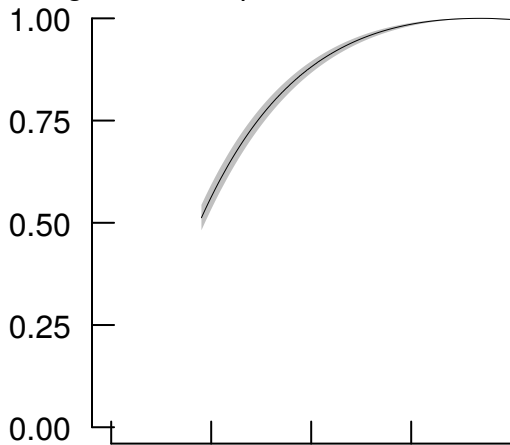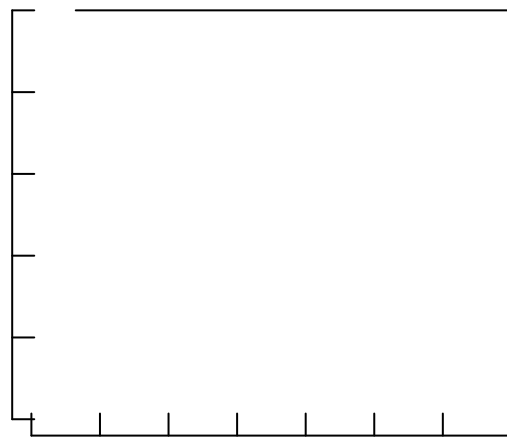

relative 10 year survival response

survival: sample size= 10509 , N & S corr.= 0.37 , VIF\_N= 1.27 , VIF\_S= 1.6

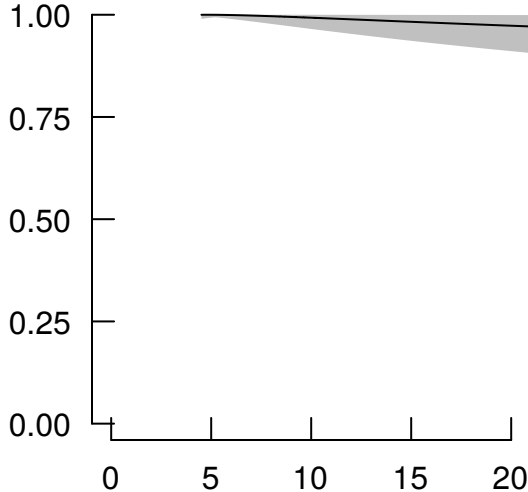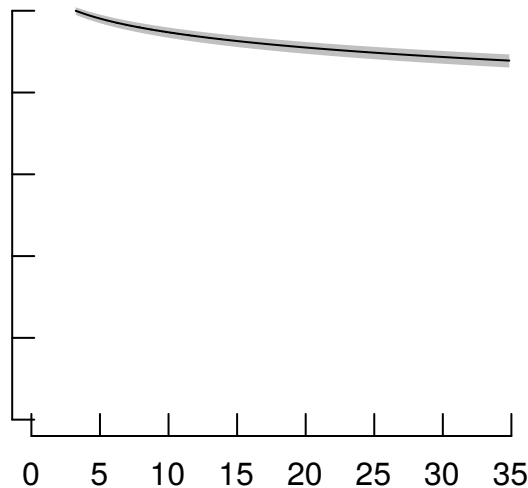

N deposition (kg N ha<sup>-1</sup> yr<sup>-1</sup>)

S deposition (kg S ha<sup>-1</sup> yr<sup>-1</sup>)

**northern pin oak**  
*Quercus ellipsoidalis*

**N deposition**

**S deposition**

growth: sample size= 3616 , N & S corr.= 0.41 , VIF\_N= 2.08 , VIF\_S= 2.46

relative annual growth response

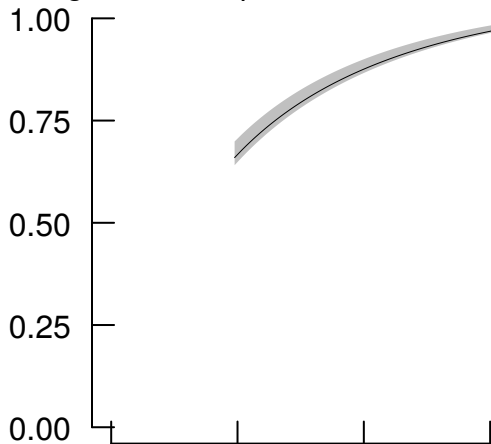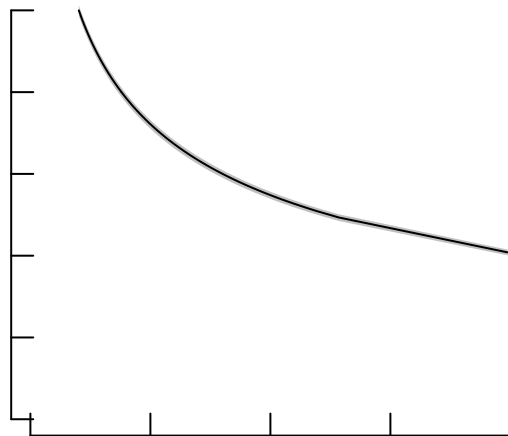

relative 10 year survival response

survival: sample size= 4187 , N & S corr.= 0.4 , VIF\_N= 2.11 , VIF\_S= 2.43

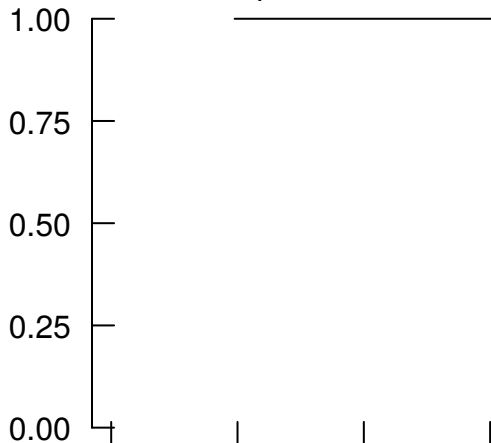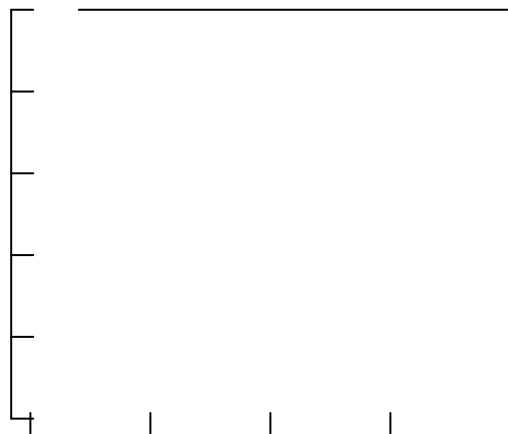

N deposition (kg N ha<sup>-1</sup> yr<sup>-1</sup>)

S deposition (kg S ha<sup>-1</sup> yr<sup>-1</sup>)

# southern red oak

*Quercus falcata*

## N deposition

## S deposition

growth: sample size= 7479 , N & S corr.= 0.36 , VIF\_N= 1.19 , VIF\_S= 1.26

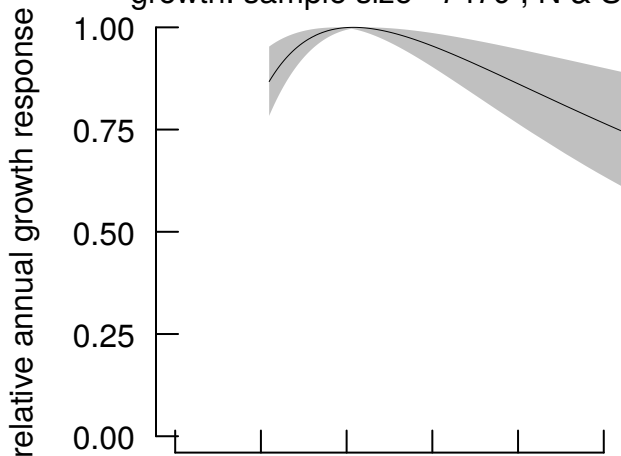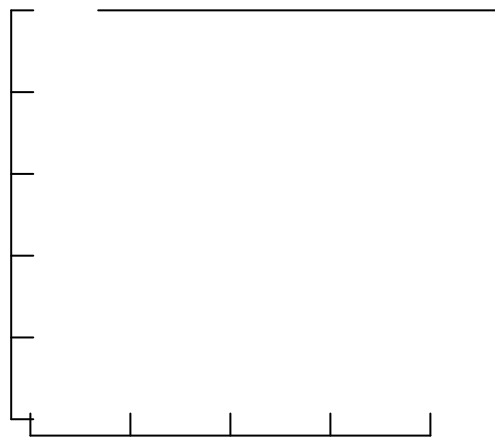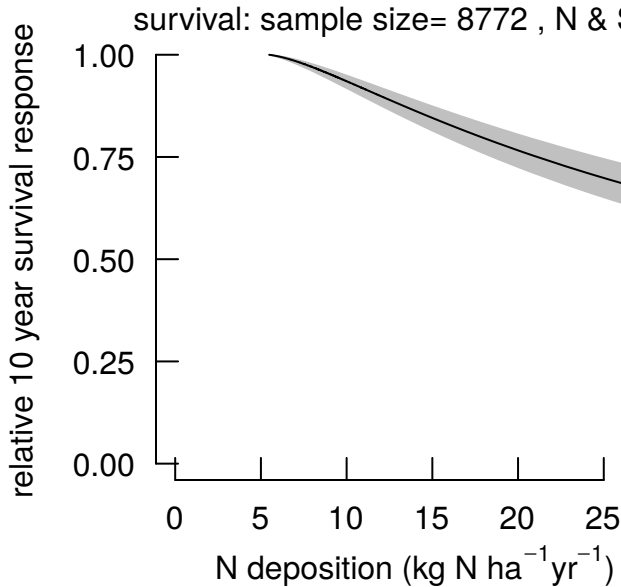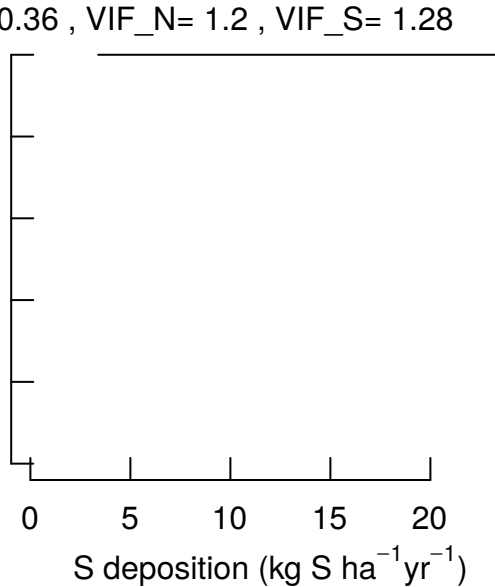

survival: sample size= 8772 , N & S corr.= 0.36 , VIF\_N= 1.2 , VIF\_S= 1.28

**laurel oak**  
*Quercus laurifolia*

**N deposition**

**S deposition**

growth: sample size= 4957 , N & S corr.= 0.41 , VIF\_N= 1.23 , VIF\_S= 1.41

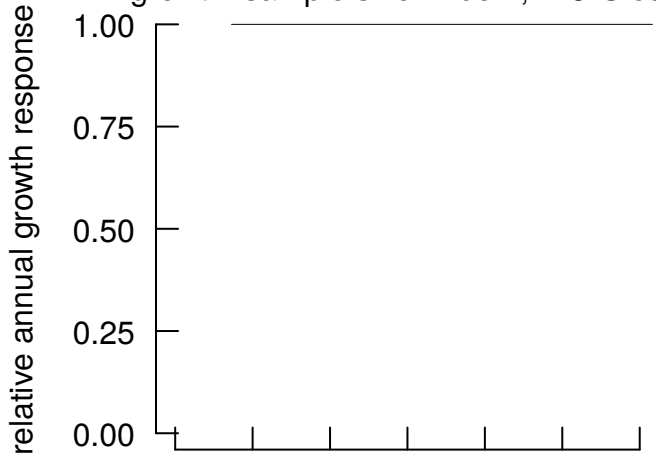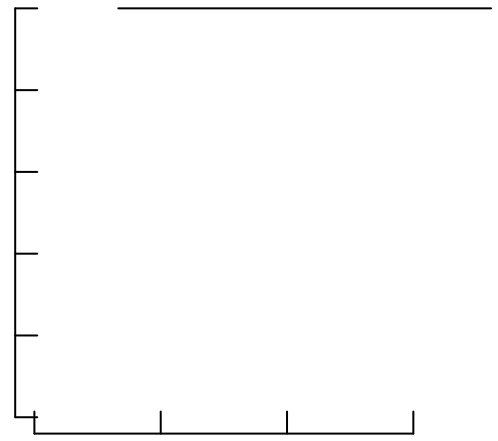

survival: sample size= 5740 , N & S corr.= 0.41 , VIF\_N= 1.24 , VIF\_S= 1.42

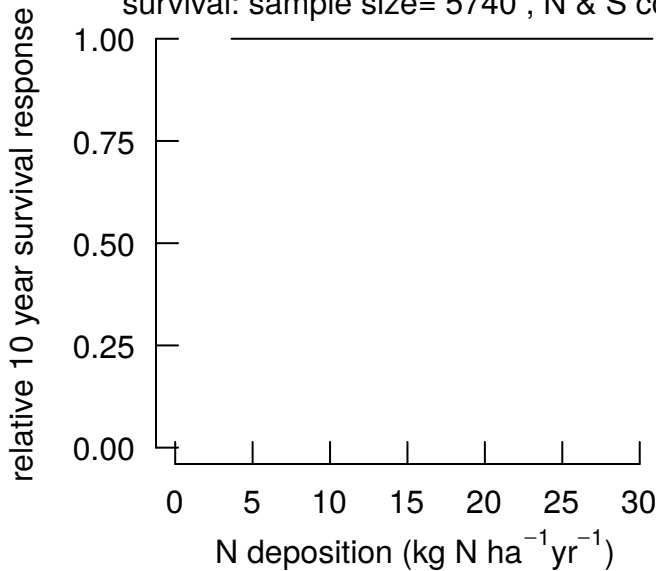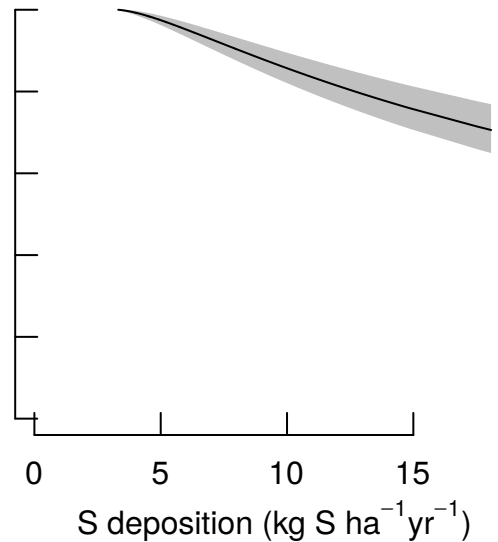



**bur oak**  
*Quercus macrocarpa*

**N deposition**

**S deposition**

growth: sample size= 7180 , N & S corr.= 0.59 , VIF\_N= 2.23 , VIF\_S= 2.27

relative annual growth response

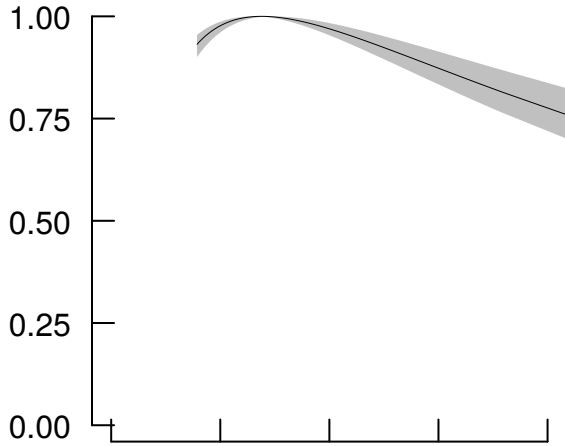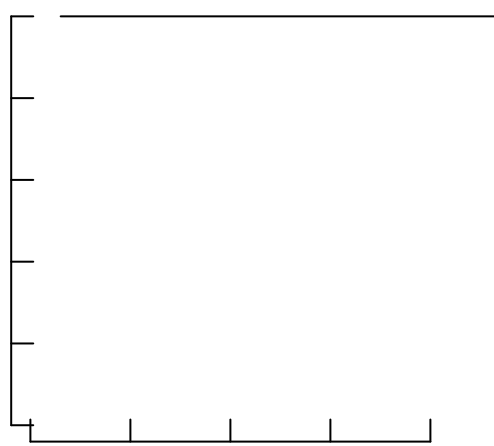

relative 10 year survival response

survival: sample size= 8123 , N & S corr.= 0.58 , VIF\_N= 2.17 , VIF\_S= 2.26

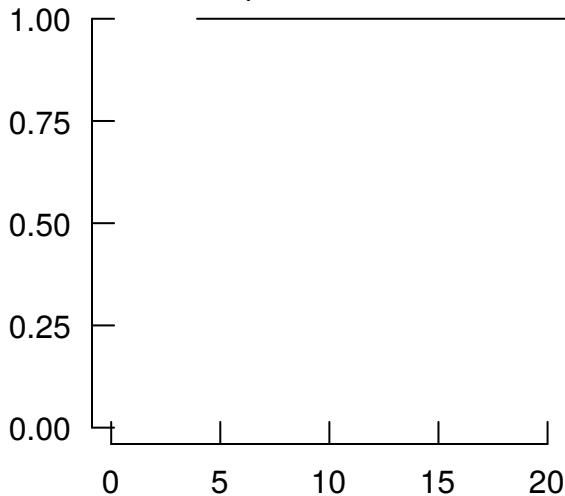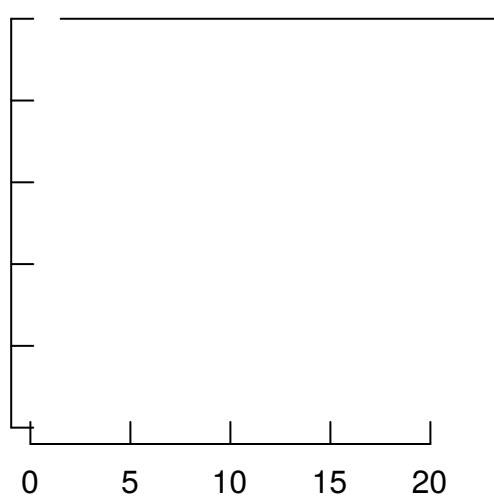

N deposition (kg N ha<sup>-1</sup> yr<sup>-1</sup>)

S deposition (kg S ha<sup>-1</sup> yr<sup>-1</sup>)

# chinkapin oak

*Quercus muehlenbergii*

## N deposition

## S deposition

growth: sample size= 2629 , N & S corr.= 0.31 , VIF\_N= 1.14 , VIF\_S= 1.62

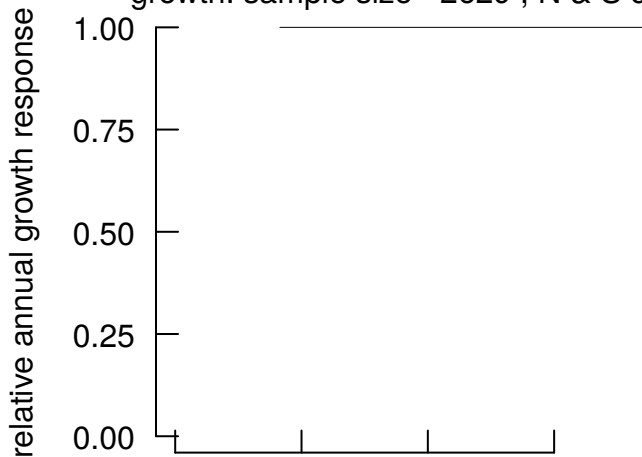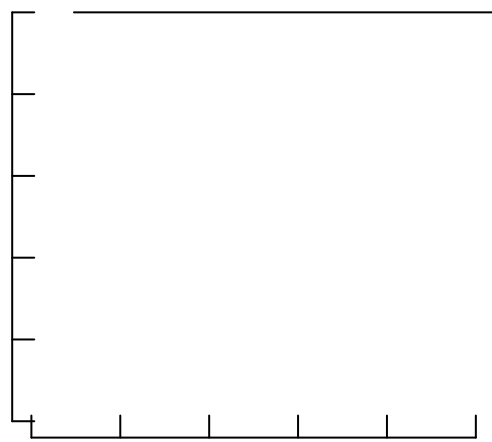

survival: sample size= 3067 , N & S corr.= 0.31 , VIF\_N= 1.15 , VIF\_S= 1.6

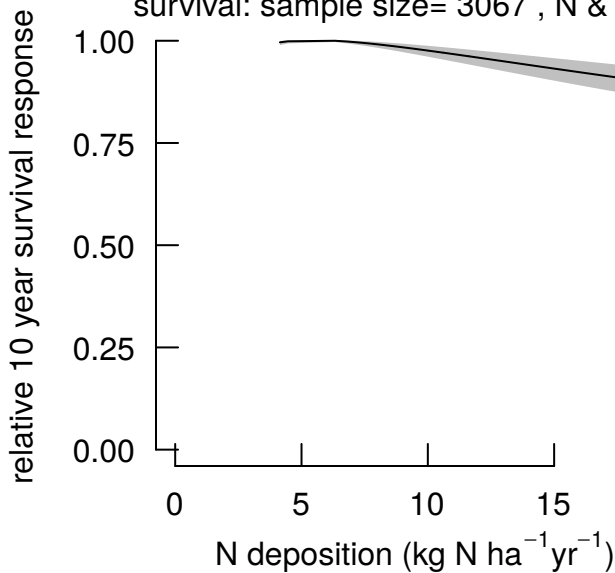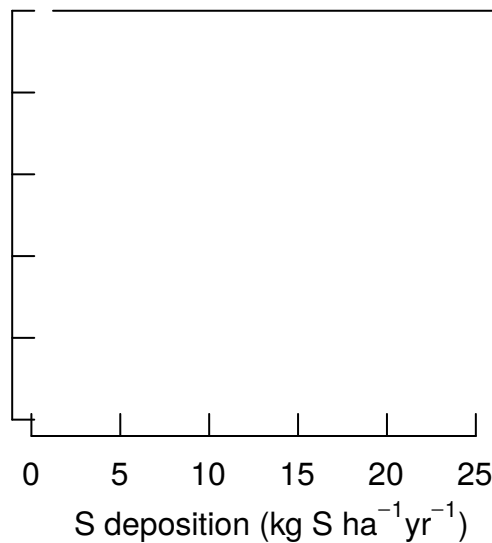

**water oak**  
*Quercus nigra*

**N deposition**

**S deposition**

growth: sample size= 12352 , N & S corr.= 0.26 , VIF\_N= 1.19 , VIF\_S= 1.23

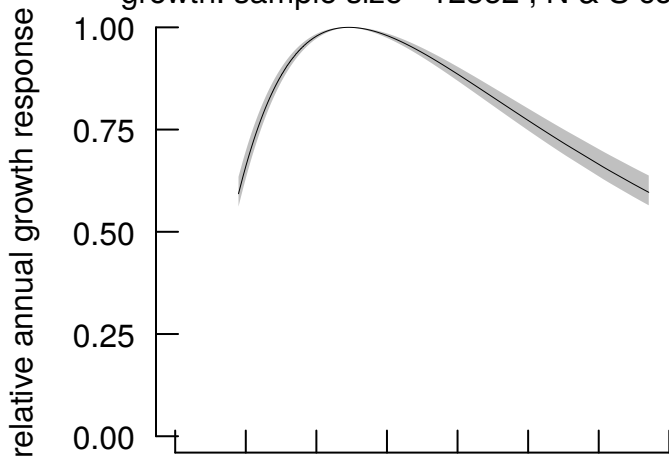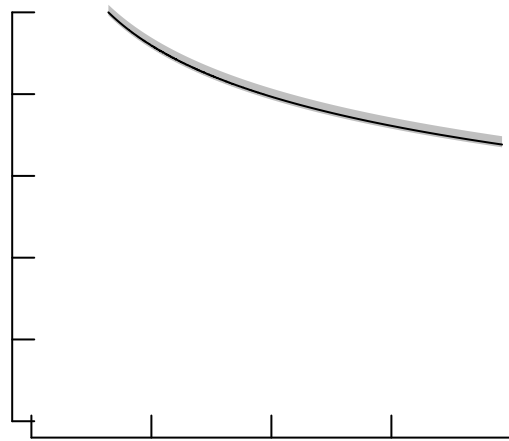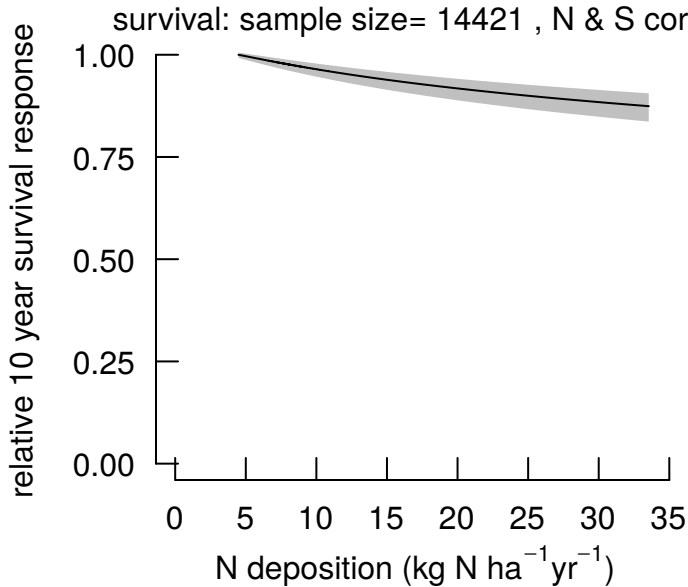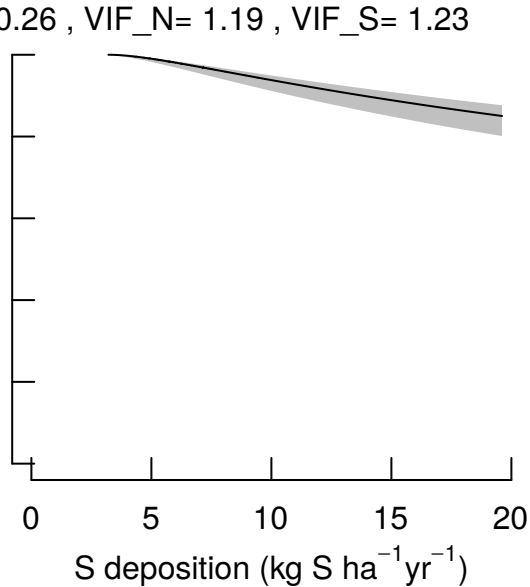

**willow oak**  
*Quercus phellos*

**N deposition**

**S deposition**

growth: sample size= 2763 , N & S corr.= 0.37 , VIF\_N= 1.21 , VIF\_S= 1.27

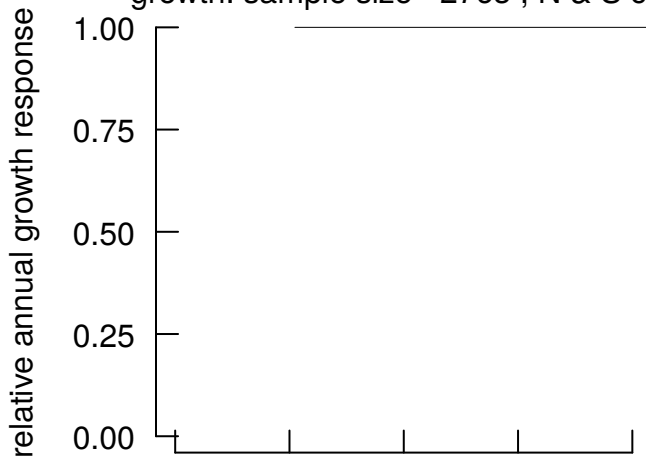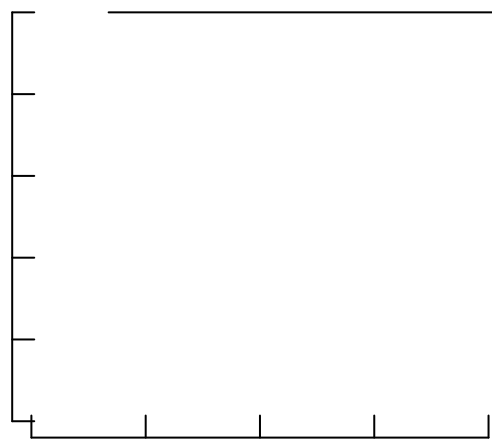

survival: sample size= 3217 , N & S corr.= 0.37 , VIF\_N= 1.22 , VIF\_S= 1.27

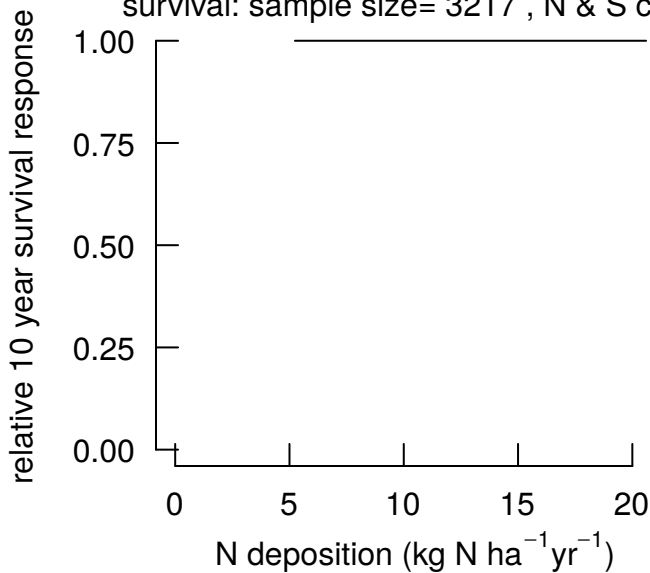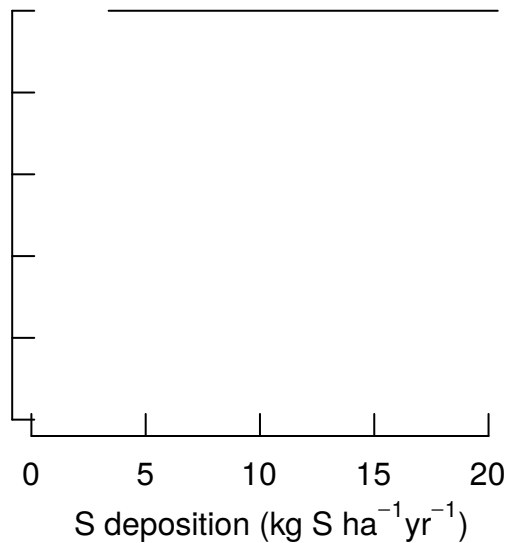

**chestnut oak**  
*Quercus prinus*

**N deposition**

**S deposition**

growth: sample size= 20711 , N & S corr.= 0.45 , VIF\_N= 1.34 , VIF\_S= 1.93

relative annual growth response

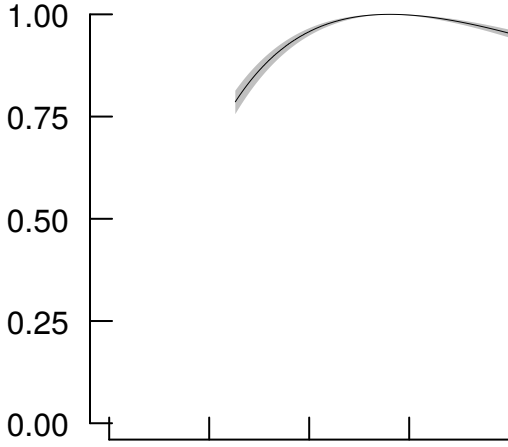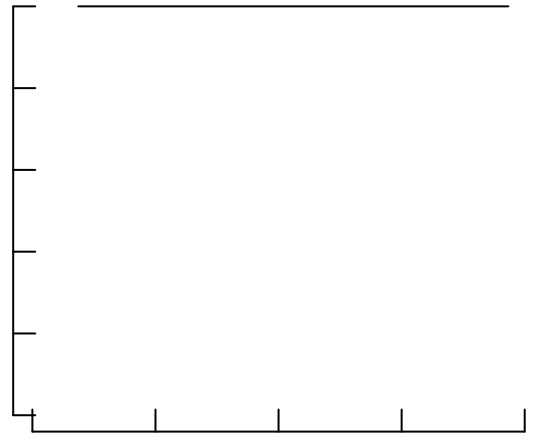

relative 10 year survival response

survival: sample size= 23211 , N & S corr.= 0.44 , VIF\_N= 1.34 , VIF\_S= 1.92

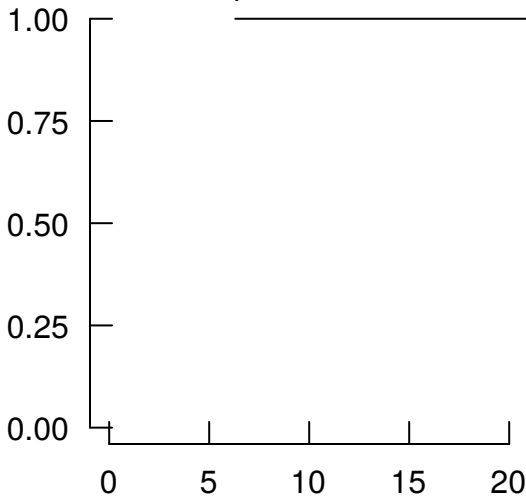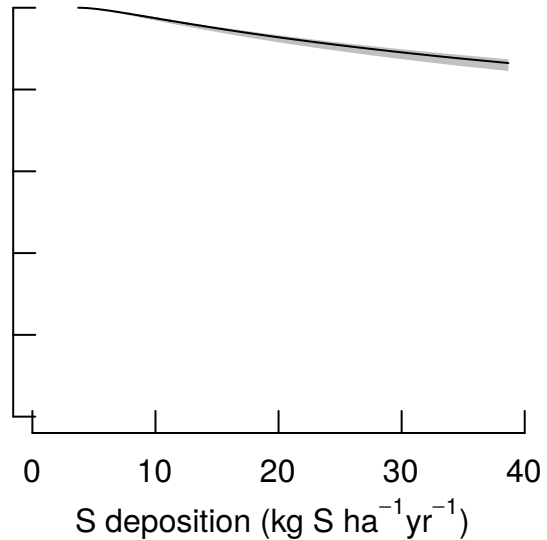

# northern red oak

*Quercus rubra*

## N deposition

## S deposition

growth: sample size= 28557 , N & S corr.= 0.42 , VIF\_N= 1.57 , VIF\_S= 1.35

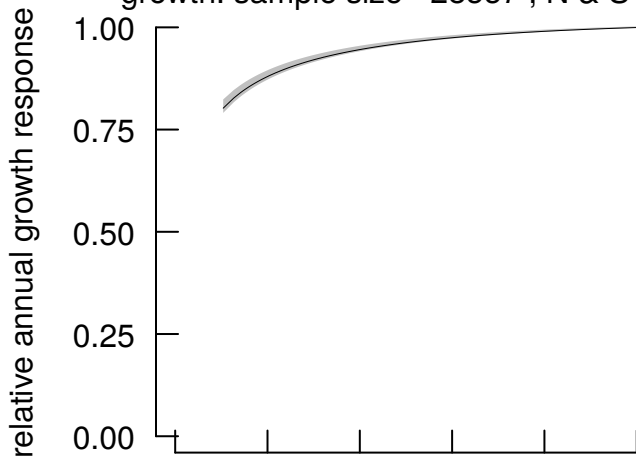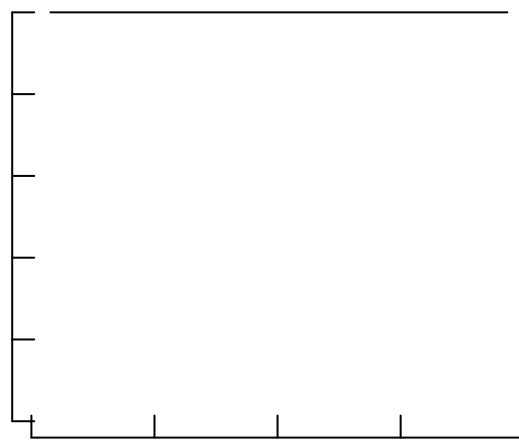

survival: sample size= 31397 , N & S corr.= 0.41 , VIF\_N= 1.54 , VIF\_S= 1.34

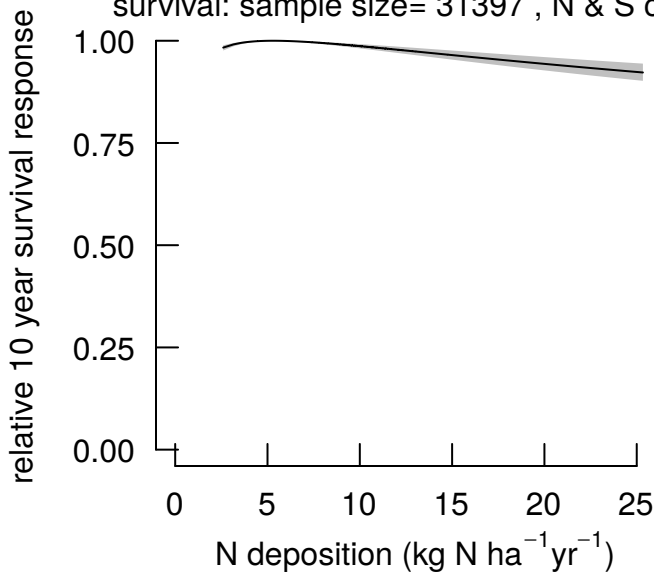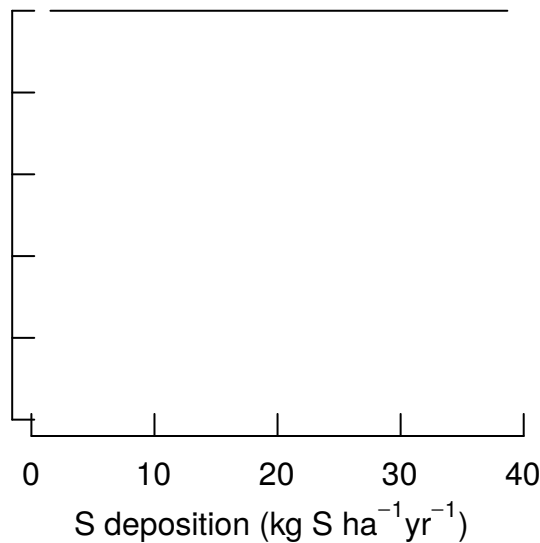

**post oak**  
*Quercus stellata*

**N deposition**

**S deposition**

growth: sample size= 16208 , N & S corr.= 0.13 , VIF\_N= 1.23 , VIF\_S= 1.11

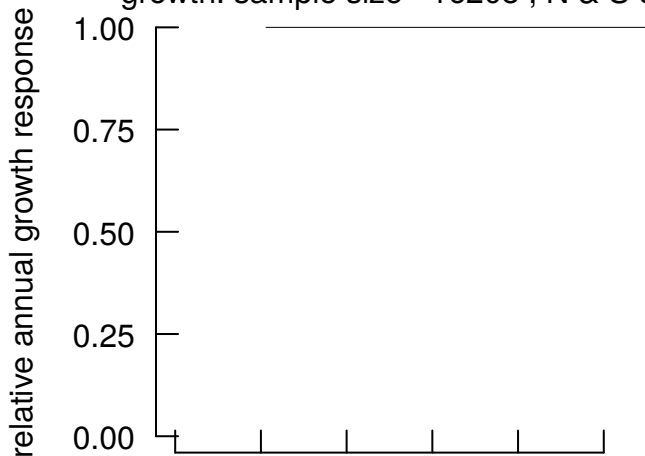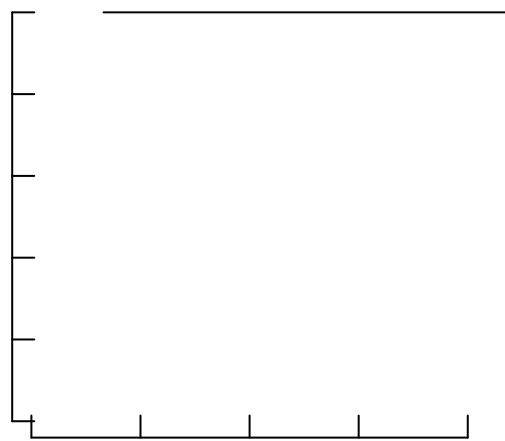

survival: sample size= 20101 , N & S corr.= 0.14 , VIF\_N= 1.23 , VIF\_S= 1.12

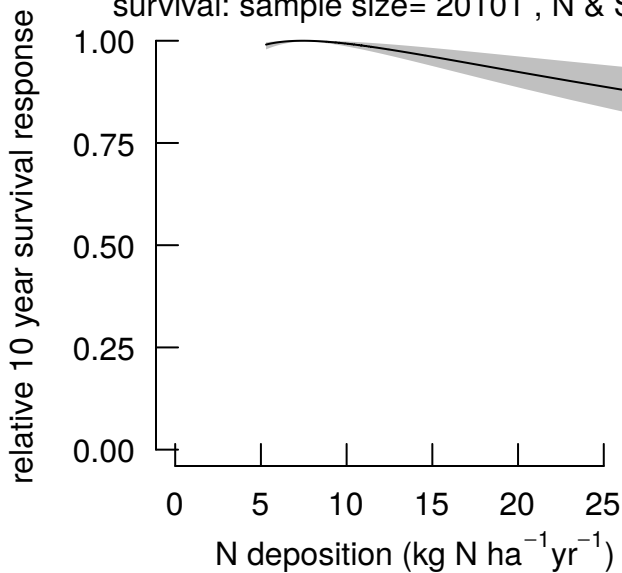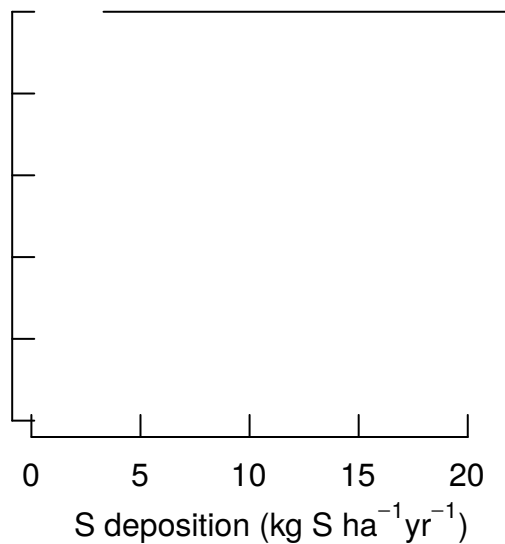

**black oak**  
*Quercus velutina*

**N deposition**

**S deposition**

growth: sample size= 18559 , N & S corr.= 0.13 , VIF\_N= 1.05 , VIF\_S= 1.11

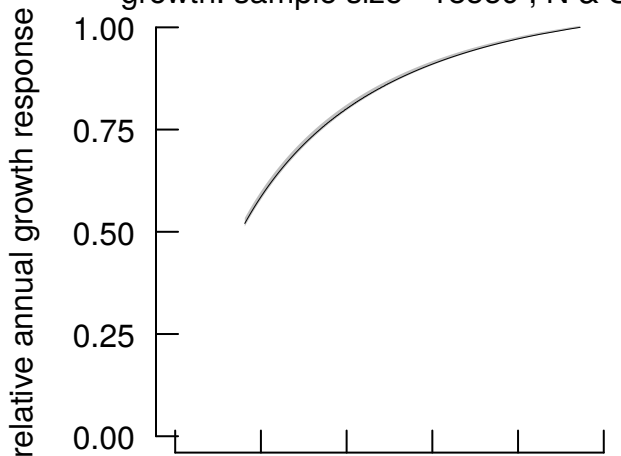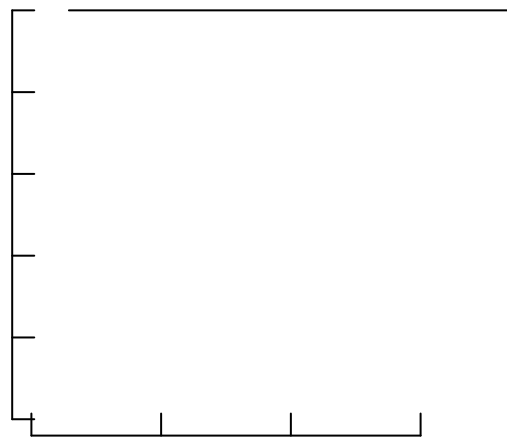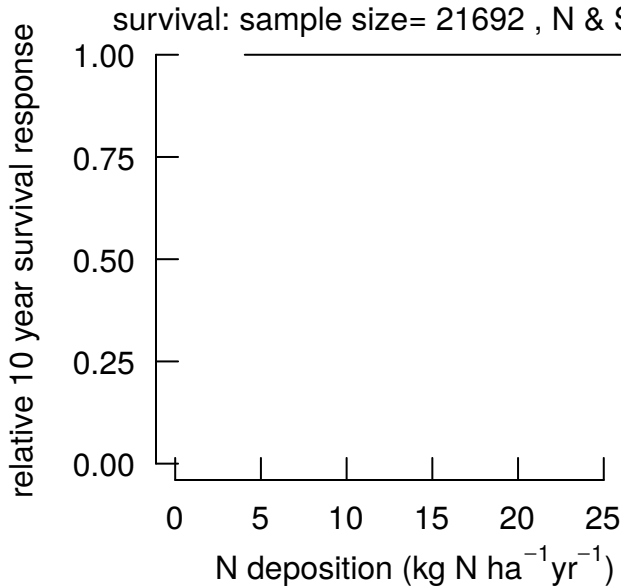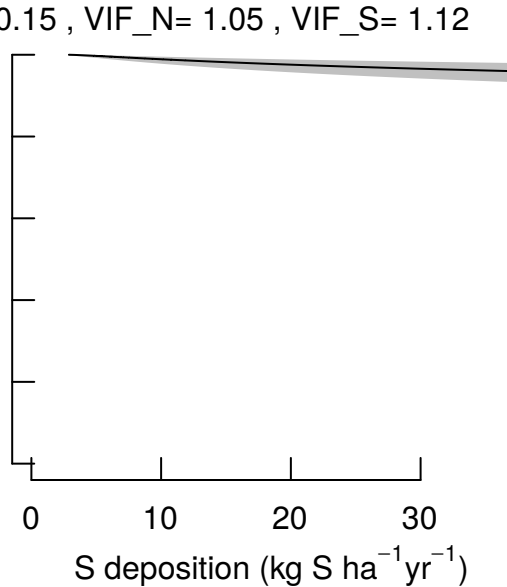



# black locust

*Robinia pseudoacacia*

## N deposition

## S deposition

growth: sample size= 3822 , N & S corr.= 0.18 , VIF\_N= 1.05 , VIF\_S= 1.08

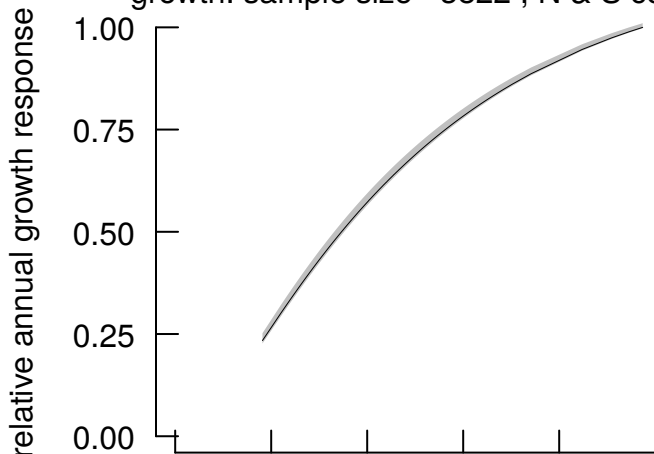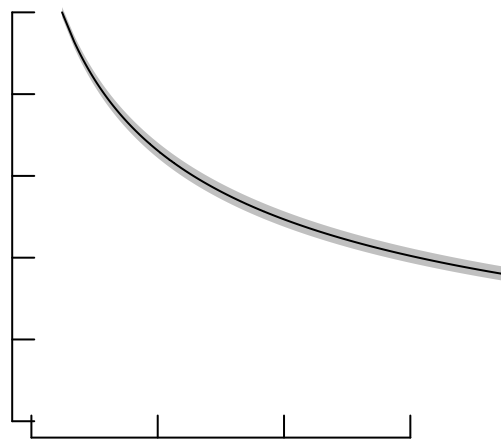

survival: sample size= 5488 , N & S corr.= 0.19 , VIF\_N= 1.06 , VIF\_S= 1.08

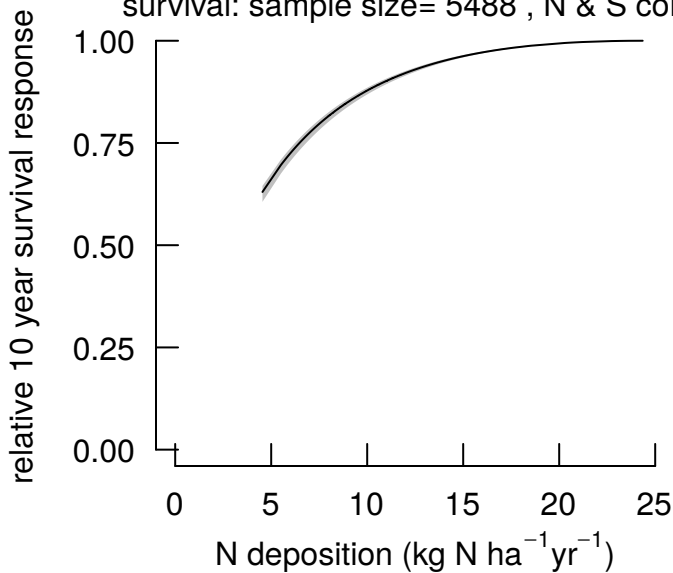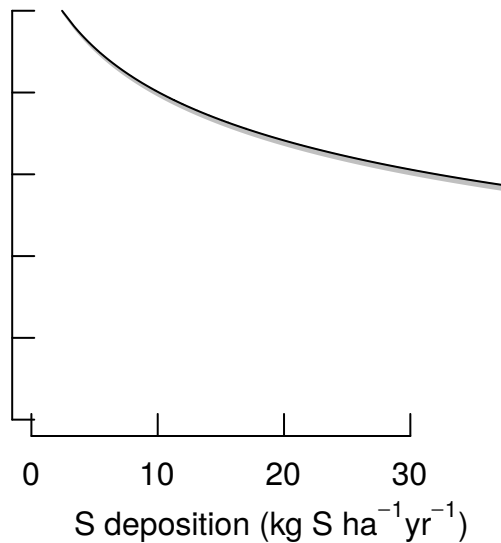

# black willow

*Salix nigra*

## N deposition

growth: sample size= 2049 , N & S corr.= 0.29 , VIF\_N= 1.33 , VIF\_S= 1.33

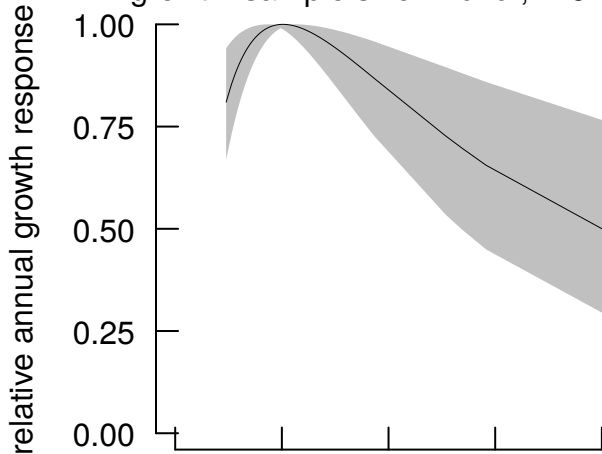

## S deposition

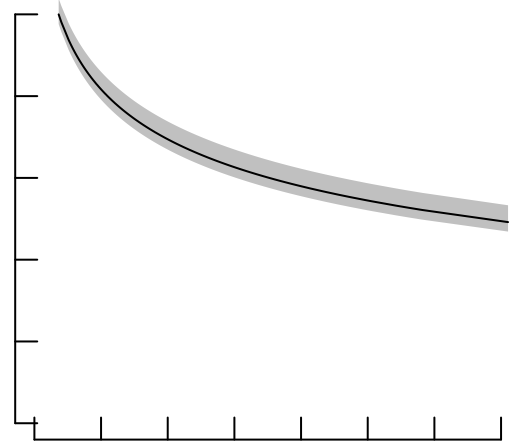

survival: sample size= 3007 , N & S corr.= 0.29 , VIF\_N= 1.3 , VIF\_S= 1.32

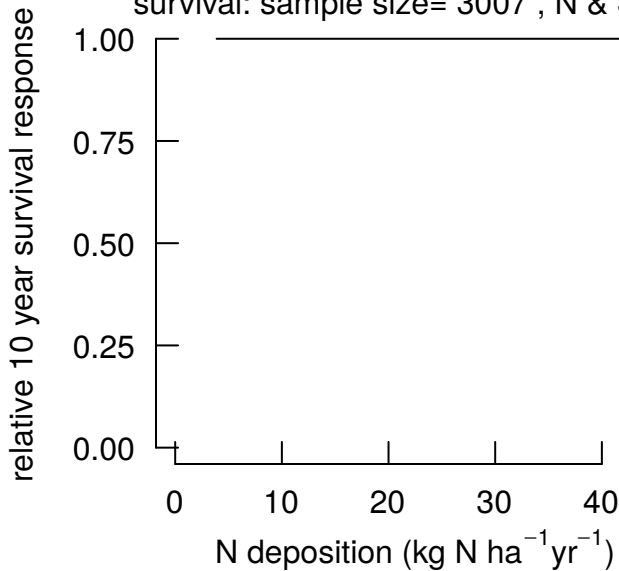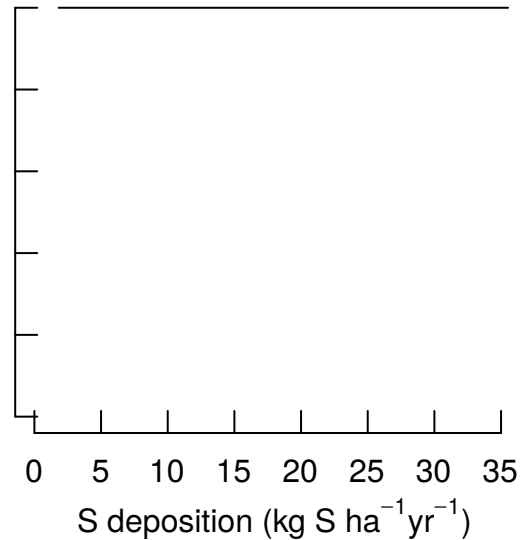

**sassafras**

*Sassafras albidum*

**N deposition**

**S deposition**

growth: sample size= 4971 , N & S corr.= 0.28 , VIF\_N= 1.12 , VIF\_S= 1.4

relative annual growth response

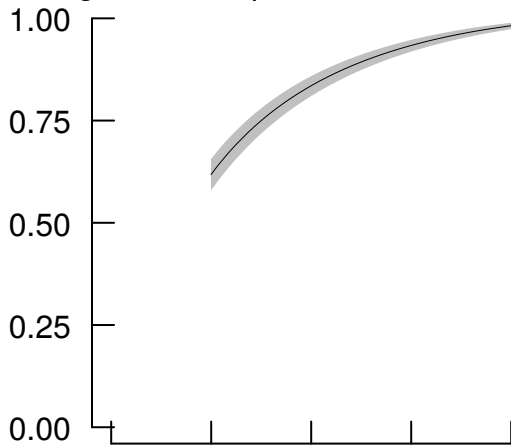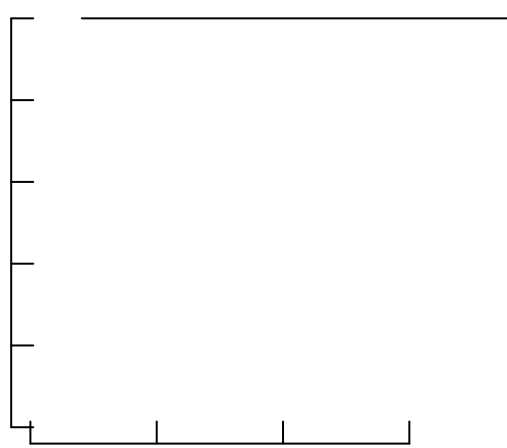

relative 10 year survival response

survival: sample size= 6227 , N & S corr.= 0.3 , VIF\_N= 1.12 , VIF\_S= 1.42

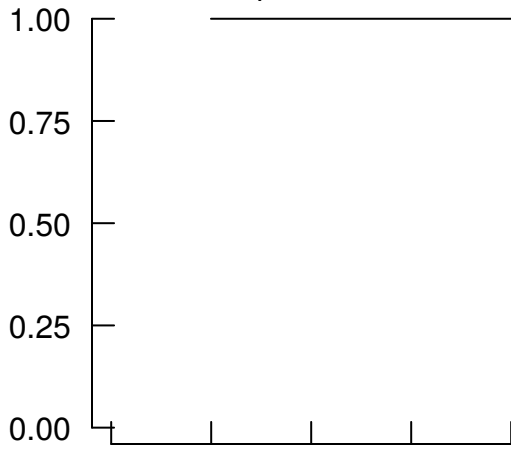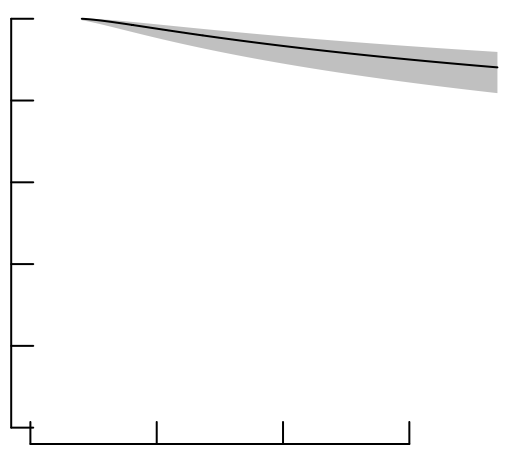

N deposition (kg N ha<sup>-1</sup> yr<sup>-1</sup>)

S deposition (kg S ha<sup>-1</sup> yr<sup>-1</sup>)

# American basswood

*Tilia americana*

## N deposition

## S deposition

growth: sample size= 12587 , N & S corr.= 0.4 , VIF\_N= 1.44 , VIF\_S= 2.08

relative annual growth response

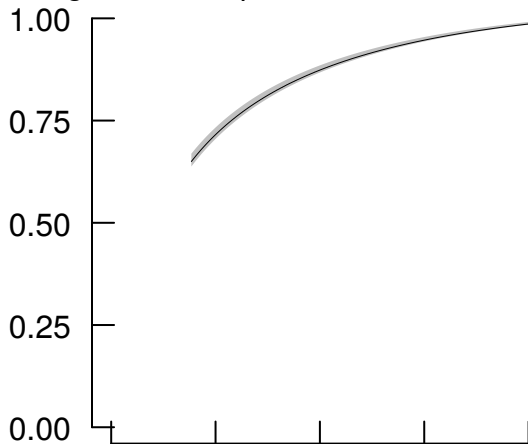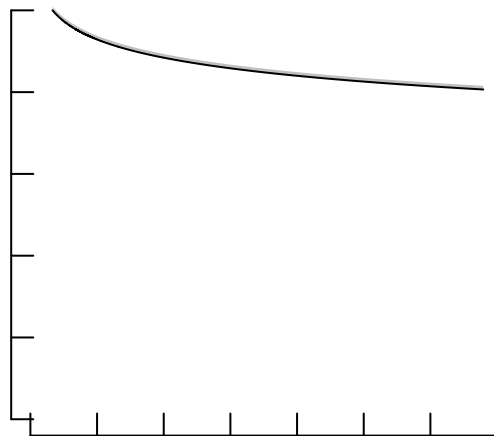

relative 10 year survival response

survival: sample size= 15093 , N & S corr.= 0.39 , VIF\_N= 1.41 , VIF\_S= 2.08

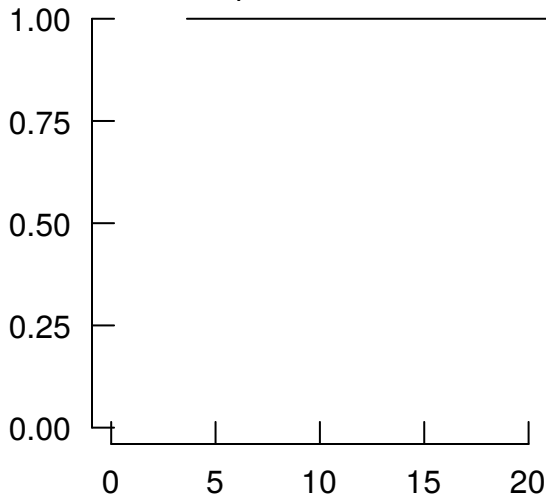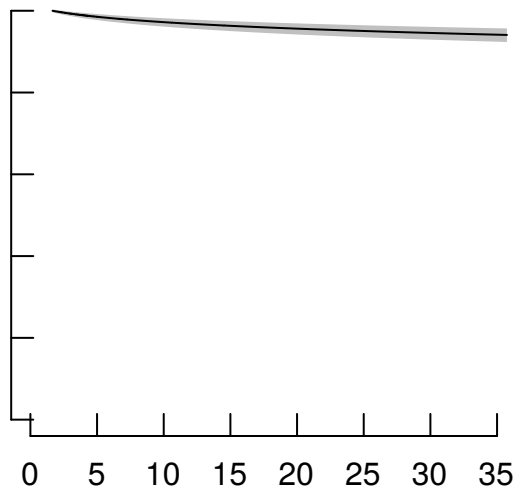

N deposition (kg N ha<sup>-1</sup> yr<sup>-1</sup>)

S deposition (kg S ha<sup>-1</sup> yr<sup>-1</sup>)

# winged elm

*Ulmus alata*

## N deposition

## S deposition

growth: sample size= 5198 , N & S corr.= 0.38 , VIF\_N= 1.34 , VIF\_S= 1.33

relative annual growth response

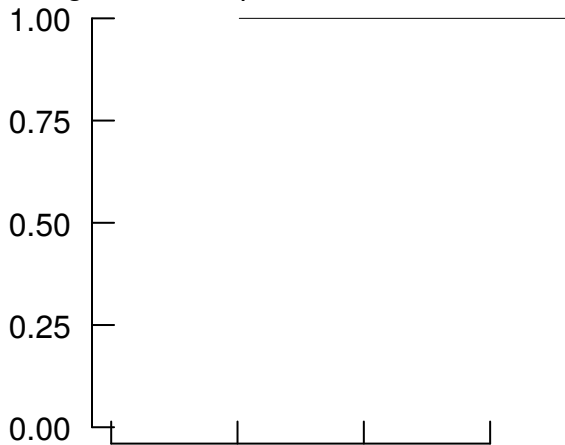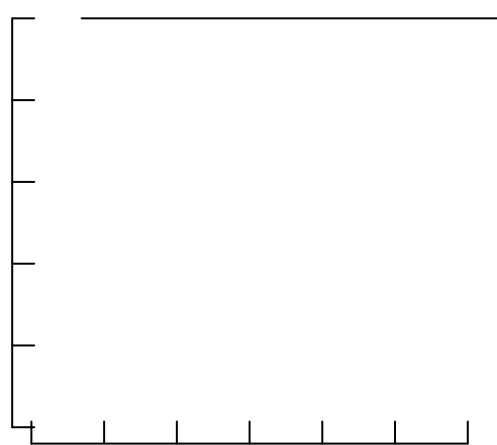

survival: sample size= 6682 , N & S corr.= 0.37 , VIF\_N= 1.35 , VIF\_S= 1.31

relative 10 year survival response

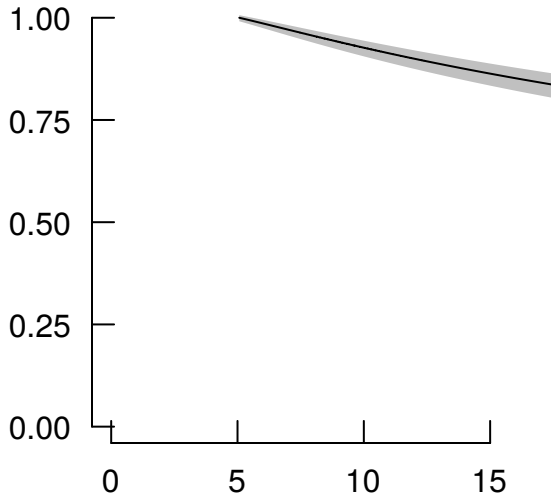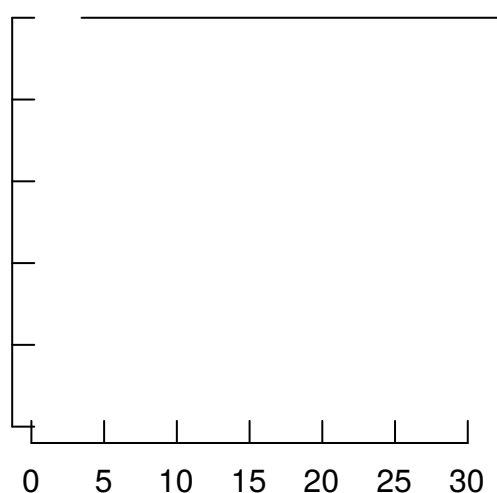

N deposition (kg N ha<sup>-1</sup> yr<sup>-1</sup>)

S deposition (kg S ha<sup>-1</sup> yr<sup>-1</sup>)

**American elm**  
*Ulmus americana*

**N deposition**

**S deposition**

growth: sample size= 14210 , N & S corr.= 0.25 , VIF\_N= 1.07 , VIF\_S= 1.27

relative annual growth response

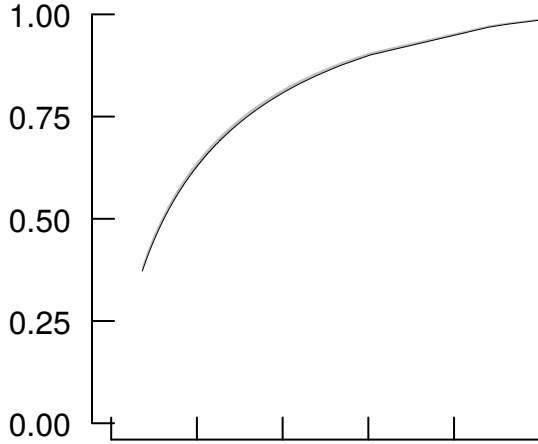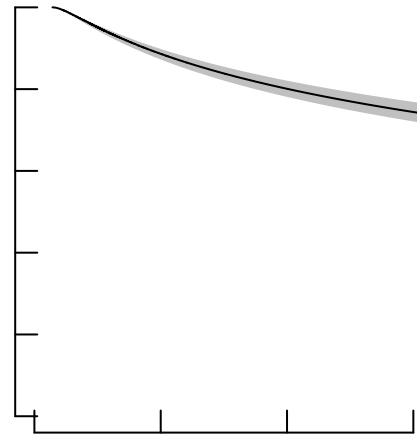

survival: sample size= 18811 , N & S corr.= 0.24 , VIF\_N= 1.07 , VIF\_S= 1.27

relative 10 year survival response

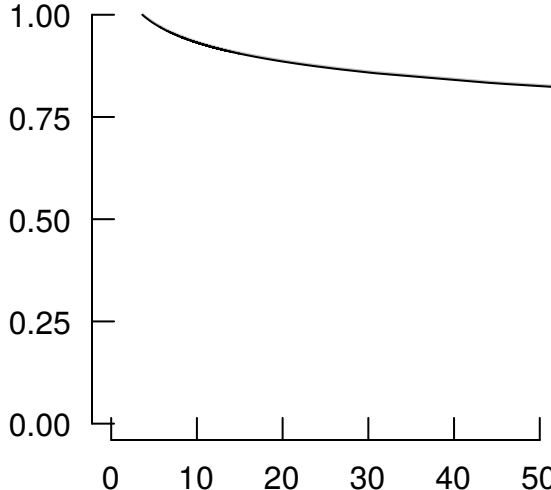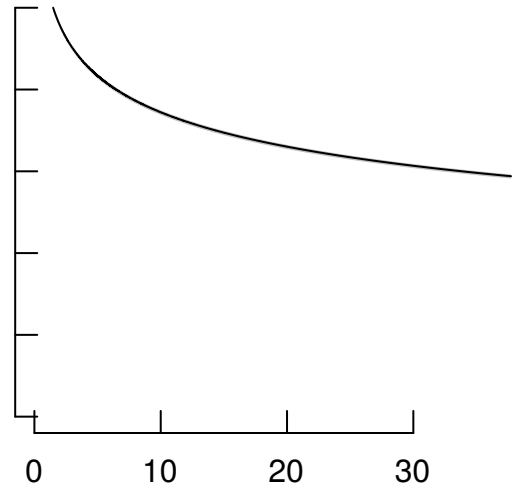

N deposition (kg N ha<sup>-1</sup> yr<sup>-1</sup>)

S deposition (kg S ha<sup>-1</sup> yr<sup>-1</sup>)

# slippery elm

*Ulmus rubra*

## N deposition

## S deposition

growth: sample size= 4087 , N & S corr.= 0.085 , VIF\_N= 1.26 , VIF\_S= 1.19

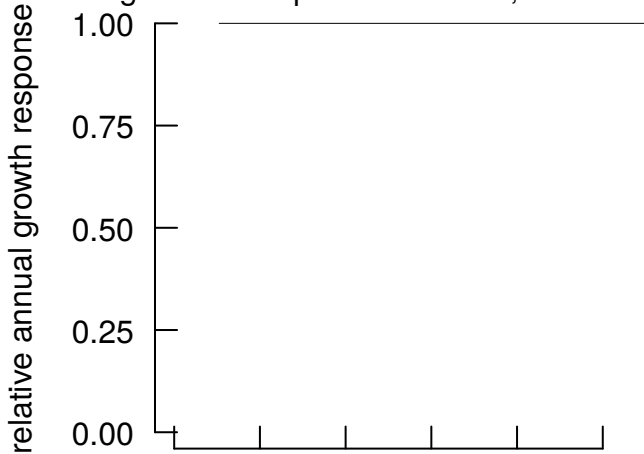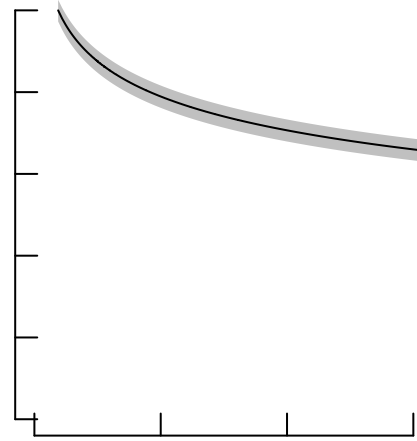

survival: sample size= 5431 , N & S corr.= 0.07 , VIF\_N= 1.3 , VIF\_S= 1.21

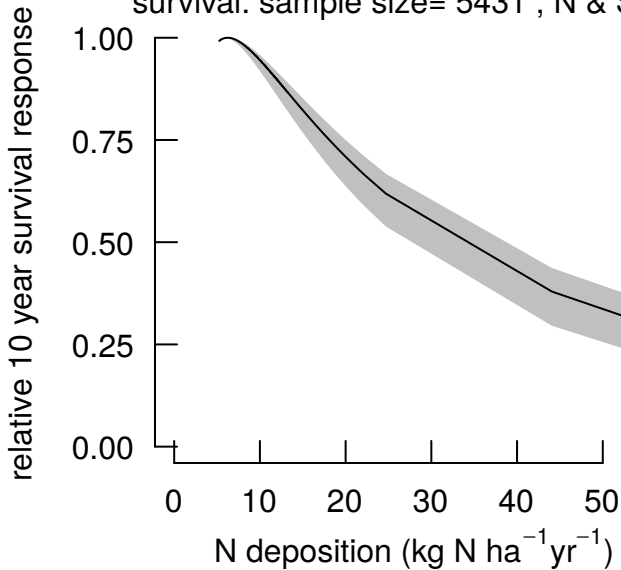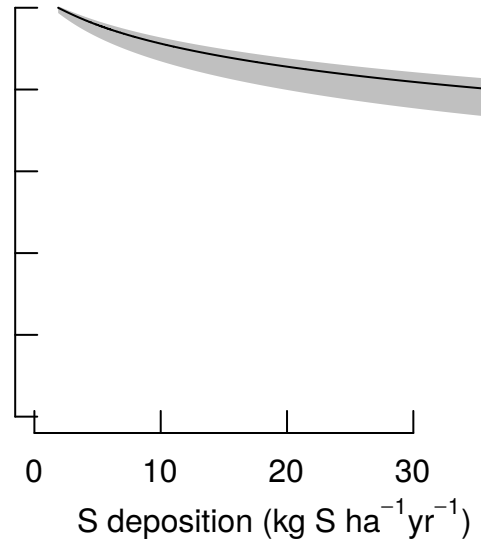

Supplement: pone.0205296.s005.pdf [file pone.0205296.s005.pdf]
