# Supplementary material for: Growth and survival relationships of 71 tree species with nitrogen and sulfur deposition across the conterminous U.S
Source: PubMed Central journal article supplement (PMC6193662; doi:10.1371/journal.pone.0205296), 2018-10-18
Supplement: pone.0205296.s003.pdf [file pone.0205296.s003.pdf]

**Table S3. Tree survival equations.** Survival equations used to estimate the spatial relationship between tree survival and atmospheric deposition. *Note: BAL is the basal area of all trees greater than the tree of interest within the subplot divided by 4.*

$$P(s) = \left[ a \times \left( 1 - zc_1 \cdot e^{-zc_2 \cdot \text{size}} \right) \times e^{-zc_3 \cdot \text{size}^{zc_4}} \times e^{-br_1 \left( \frac{BA^{br_2}}{\text{ratio}} \right) \cdot \left( BA^{br_3} \right)} \times e^{\frac{-1}{2} \left( \frac{\ln(T/t_1)}{t_2} \right)^2} \times e^{\frac{-1}{2} \left( \frac{\ln(P/p_1)}{p_2} \right)^2} \times e^{\frac{-1}{2} \left( \frac{\ln(S/s_1)}{s_2} \right)^2} \times e^{\frac{-1}{2} \left( \frac{\ln(N/n_1)}{n_2} \right)^2} \right]^{\text{time}} \quad (1)$$

$$P(s) = \left[ a \times \left( 1 - zc_1 \cdot e^{-zc_2 \cdot \text{size}} \right) \times e^{-zc_3 \cdot \text{size}^{zc_4}} \times e^{-br_1 \left( \frac{BA^{br_2}}{\text{ratio}} \right) \cdot \left( BA^{br_3} \right)} \times e^{\frac{-1}{2} \left( \frac{\ln(T/t_1)}{t_2} \right)^2} \times e^{\frac{-1}{2} \left( \frac{\ln(P/p_1)}{p_2} \right)^2} \times e^{\frac{-1}{2} \left( \frac{\ln(S/s_1)}{s_2} \right)^2} \right]^{\text{time}} \quad (2)$$

$$P(s) = \left[ a \times \left( 1 - zc_1 \cdot e^{-zc_2 \cdot \text{size}} \right) \times e^{-zc_3 \cdot \text{size}^{zc_4}} \times e^{-br_1 \left( \frac{BA^{br_2}}{\text{ratio}} \right) \cdot \left( BA^{br_3} \right)} \times e^{\frac{-1}{2} \left( \frac{\ln(T/t_1)}{t_2} \right)^2} \times e^{\frac{-1}{2} \left( \frac{\ln(P/p_1)}{p_2} \right)^2} \times e^{\frac{-1}{2} \left( \frac{\ln(N/n_1)}{n_2} \right)^2} \right]^{\text{time}} \quad (3)$$

$$P(s) = \left[ a \times \left( 1 - zc_1 \cdot e^{-zc_2 \cdot \text{size}} \right) \times e^{-zc_3 \cdot \text{size}^{zc_4}} \times e^{-br_1 \left( \frac{BA^{br_2}}{\text{ratio}} \right) \cdot \left( BA^{br_3} \right)} \times e^{\frac{-1}{2} \left( \frac{\ln(T/t_1)}{t_2} \right)^2} \times e^{\frac{-1}{2} \left( \frac{\ln(P/p_1)}{p_2} \right)^2} \right]^{\text{time}} \quad (4)$$

$$P(s) = \left[ a \times e^{\frac{-1}{2} \left( \frac{\ln(\text{size}/z_1)}{z_2} \right)^2} \times e^{\frac{-1}{2} \left( \frac{\ln(BA/ba_1)}{ba_2} \right)^2} + \frac{-1}{2} \left( \frac{\ln((BAL+1)/(bl_1+1))}{bl_2} \right)^2 \times e^{\frac{-1}{2} \left( \frac{\ln(T/t_1)}{t_2} \right)^2} \times e^{\frac{-1}{2} \left( \frac{\ln(P/p_1)}{p_2} \right)^2} \times e^{\frac{-1}{2} \left( \frac{\ln(S/s_1)}{s_2} \right)^2} \times e^{\frac{-1}{2} \left( \frac{\ln(N/n_1)}{n_2} \right)^2} \right]^{\text{time}} \quad (5)$$

$$P(s) = \left[ a \times e^{\frac{-1}{2} \left( \frac{\ln(\text{size}/z_1)}{z_2} \right)^2} \times e^{\frac{-1}{2} \left( \frac{\ln(BA/ba_1)}{ba_2} \right)^2} + \frac{-1}{2} \left( \frac{\ln((BAL+1)/(bl_1+1))}{bl_2} \right)^2 \times e^{\frac{-1}{2} \left( \frac{\ln(T/t_1)}{t_2} \right)^2} \times e^{\frac{-1}{2} \left( \frac{\ln(P/p_1)}{p_2} \right)^2} \times e^{\frac{-1}{2} \left( \frac{\ln(S/s_1)}{s_2} \right)^2} \right]^{\text{time}} \quad (6)$$

$$P(s) = \left[ a \times e^{\frac{-1}{2} \left( \frac{\ln(\text{size}/z_1)}{z_2} \right)^2} \times e^{\frac{-1}{2} \left( \frac{\ln(BA/ba_1)}{ba_2} \right)^2} + \frac{-1}{2} \left( \frac{\ln((BAL+1)/(bl_1+1))}{bl_2} \right)^2} \times e^{\frac{-1}{2} \left( \frac{\ln(T/t_1)}{t_2} \right)^2} \times e^{\frac{-1}{2} \left( \frac{\ln(P/p_1)}{p_2} \right)^2} \times e^{\frac{-1}{2} \left( \frac{\ln(N/n_1)}{n_2} \right)^2} \right]^{\text{time}} \quad (7)$$

$$P(s) = \left[ a \times e^{\frac{-1}{2} \left( \frac{\ln(\text{size}/z_1)}{z_2} \right)^2} \times e^{\frac{-1}{2} \left( \frac{\ln(BA/ba_1)}{ba_2} \right)^2} + \frac{-1}{2} \left( \frac{\ln((BAL+1)/(bl_1+1))}{bl_2} \right)^2} \times e^{\frac{-1}{2} \left( \frac{\ln(T/t_1)}{t_2} \right)^2} \times e^{\frac{-1}{2} \left( \frac{\ln(P/p_1)}{p_2} \right)^2} \right]^{\text{time}} \quad (8)$$

$$P(s) = a^{\text{time}} \quad (9)$$
